# Supplementary material
Source: PubMed Central journal article supplement (PMC5752263)
Supplement: jciinsight-2-97818-s001.pdf [file jciinsight-2-97818-s001.pdf]

## Supplementary Online Content

### Therapeutic Drug Repositioning Using Personalized Proteomics of Liquid Biopsies

Velez G, Bassuk AG, Colgan D, Tsang SH, Mahajan VB.

**Supplemental Figure 1.** Linearity and reproducibility of selected cytokines.

**Supplemental Figure 2.** Steroid implant slows progression of NIV disease.

**Supplemental Figure 3.** Timeline of NIV repurposed treatment.

**Supplemental Table 1.** Demographics for vitreous biopsy patients.

**Supplemental Table 2.** Vitreous sample volumes and concentrations.

**Supplemental Table 3.** ELISA calibration curves for individual cytokines.

**Supplemental Table 4.** Quantitative results for individual patients pre-Retisert.

**Supplemental Table 5.** Clinical outcomes of bevacizumab injection.

**Supplemental Table 6.** Clinical outcomes of methotrexate injection.

**Supplemental Table 7.** Quantitative results for individual patients post-Retisert.

**Supplemental Table 8.** Cytokines that decrease following Retisert treatment.

**Supplemental Figure 1. Linearity and reproducibility of selected cytokines: (A)** ELISA calibration curve for VEGF (left). Plotting of raw concentration values for VEGF shows data reproducibility (right). **(B)** ELISA calibration curve for IL-6 (left). Plotting of raw concentration values for IL-6 shows data reproducibility (right). **(C)** ELISA calibration curve for TNF- $\alpha$  (left). Plotting of raw concentration values for TNF- $\alpha$  shows data reproducibility (right). Raw calibration curve values for all 200 cytokines are listed in Supplemental Table 2.

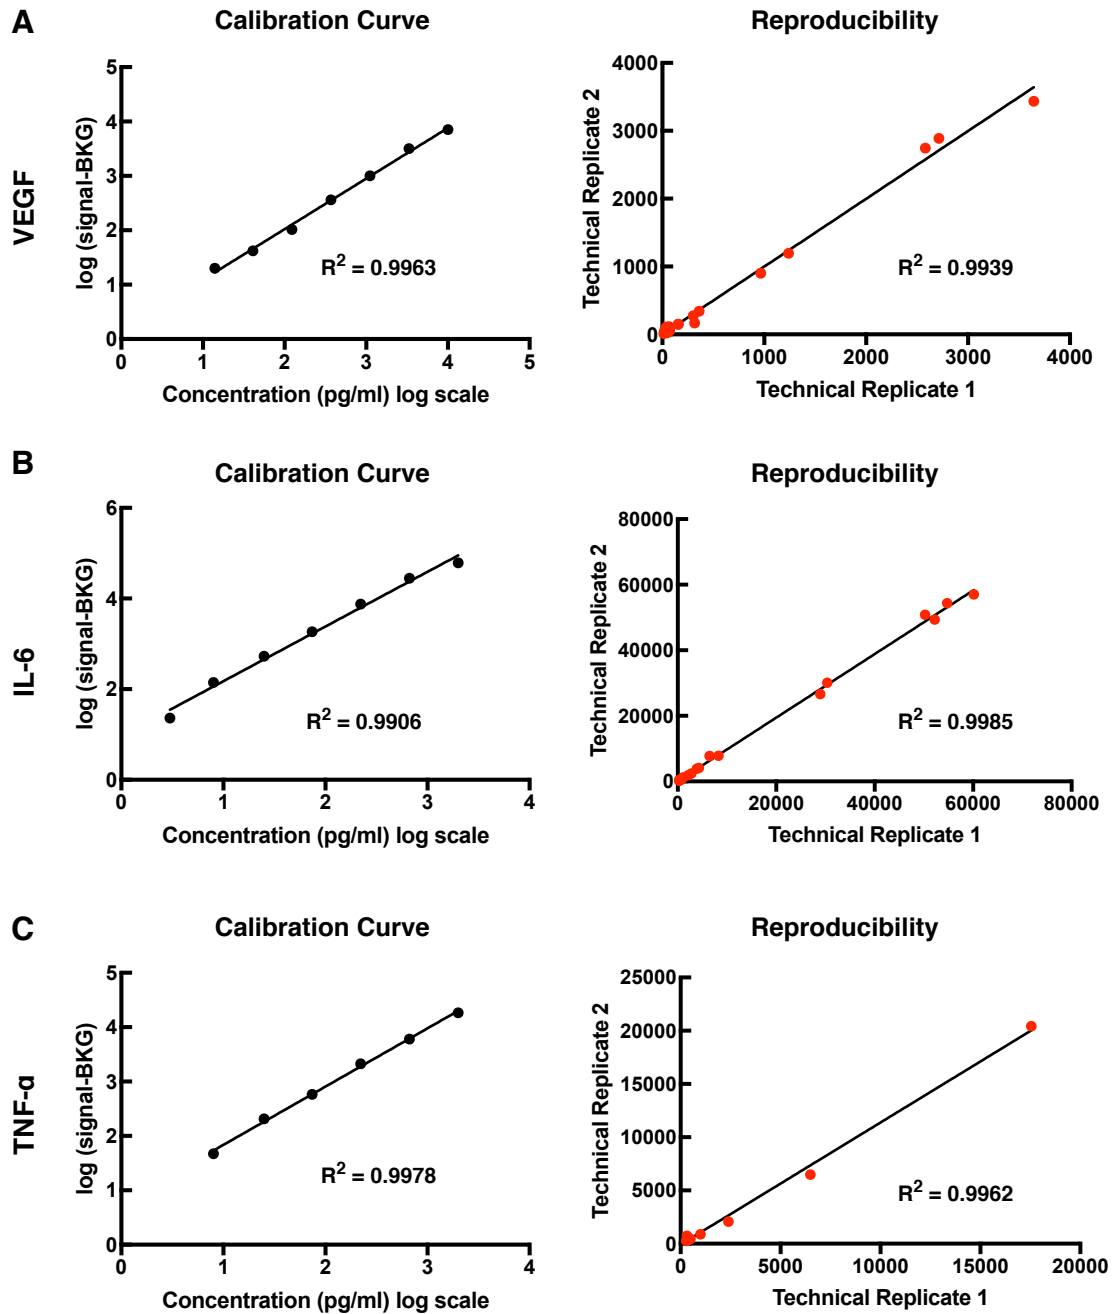

**Supplemental Figure 2. Steroid implant slows progression of NIV disease:** An implantable steroid (Retisert) normalized expression of many upregulated cytokines but eleven, including IL-6, were still overexpressed. Four control eyes (A) were compared to eight untreated NIV eyes (B) and three treated NIV eyes (C) were analyzed by hierarchal clustering;  $p < 0.05$ .

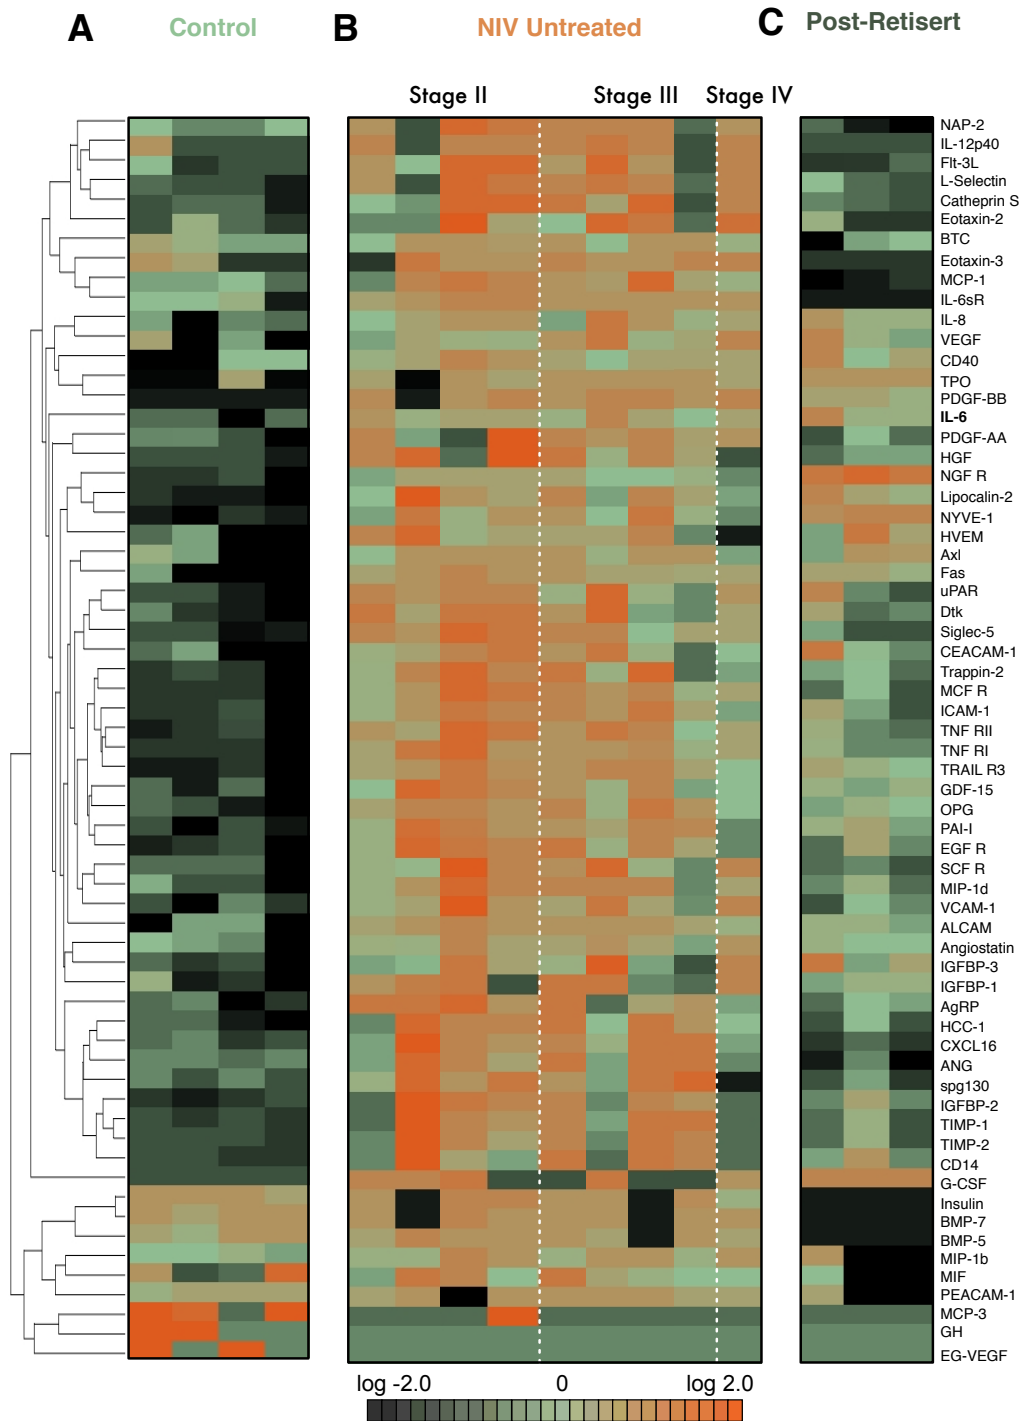

**Supplemental Figure 3. Timeline of NIV repurposed treatment:** The disease onset of NIV varies between 10 and 30 years of age with each stage lasting approximately a decade. Our proteomics-based intervention follows the progressive stages of NIV: Stage II NIV is treated with intravitreal MTX; stage III with anti-VEGF therapy and Retisert; stage IV is treated with a combination of the above drugs along with anti-IL-6 therapy.

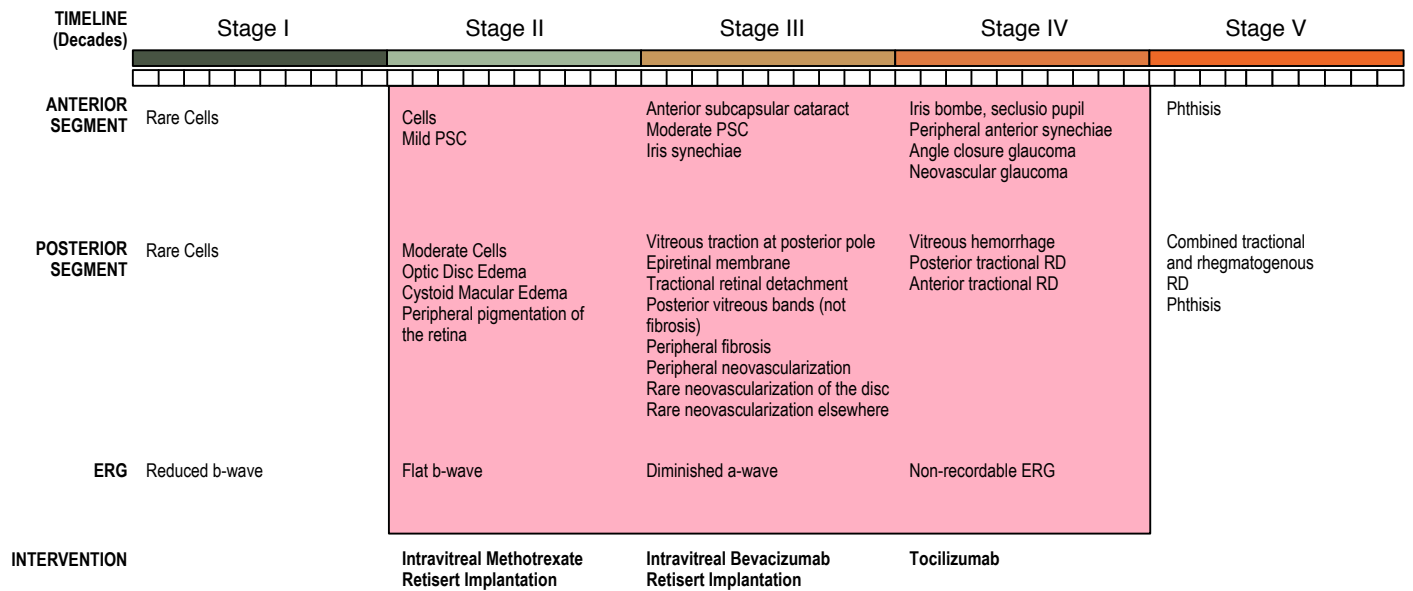

**Supplemental Table 1. Demographics for vitreous biopsy patients.**

| <b>Control Cases</b>       |            |              |                                                      |                     |
|----------------------------|------------|--------------|------------------------------------------------------|---------------------|
| <b>Case</b>                | <b>Sex</b> | <b>Stage</b> | <b>Indication</b>                                    | <b>Intervention</b> |
| 1                          | M          | -            | Macular Hole                                         | Vitrectomy          |
| 2                          | M          | -            | Epiretinal Membrane                                  | Vitrectomy          |
| 3                          | F          | -            | Epiretinal Membrane                                  | Vitrectomy          |
| 4                          | F          | -            | Epiretinal Membrane                                  | Vitrectomy          |
| <b>NIV Cases</b>           |            |              |                                                      |                     |
| 5                          | F          | II           | Cystoid Macular Edema                                | Retisert Implant    |
| 6                          | F          | II           | Cystoid Macular Edema                                | Retisert Implant    |
| 7                          | F          | II           | Cystoid Macular Edema                                | Retisert Implant    |
| 8                          | M          | III          | Cystoid Macular Edema                                | Retisert Implant    |
| 9                          | F          | III          | Epiretinal Membrane                                  | Vitrectomy          |
| 10                         | F          | III          | Epiretinal Membrane                                  | Vitrectomy          |
| 11                         | F          | III          | Epiretinal Membrane                                  | Vitrectomy          |
| 12                         | F          | IV           | Tractional Retinal Detachment, Cystoid Macular Edema | Vitrectomy          |
| <b>Post-Retisert Cases</b> |            |              |                                                      |                     |
| 6                          | F          | II           | Cystoid Macular Edema                                | Retisert Implant    |
| 7                          | F          | II           | Cystoid Macular Edema                                | Retisert Implant    |
| 8                          | M          | III          | Cystoid Macular Edema                                | Retisert Implant    |

**Supplemental Table 2. Vitreous sample volumes and concentrations.**

| <b>Patient</b> | <b>Sample Type</b> | <b>Sample Volume (µL)</b> | <b>Buffer Volume (µL)</b> | <b>Sample Used (µL)</b> | <b>Concentration Correction</b> |
|----------------|--------------------|---------------------------|---------------------------|-------------------------|---------------------------------|
| 1              | Control            | 500                       | 0                         | 4x100                   | 1.0                             |
| 2              | Control            | 500                       | 0                         | 4x100                   | 1.0                             |
| 3              | Control            | 500                       | 0                         | 4x100                   | 1.0                             |
| 4              | Control            | 500                       | 0                         | 4x100                   | 1.0                             |
| 5              | NIV                | 392                       | 108                       | 4x100                   | 1.3                             |
| 6              | NIV                | 152                       | 348                       | 4x100                   | 3.3                             |
| 7              | NIV                | 120                       | 380                       | 4x100                   | 4.2                             |
| 8              | NIV                | 220                       | 280                       | 4x100                   | 2.3                             |
| 9              | NIV                | 384                       | 116                       | 4x100                   | 1.3                             |
| 10             | NIV                | 150                       | 350                       | 4x100                   | 3.3                             |
| 11             | NIV                | 180                       | 320                       | 4x100                   | 2.8                             |
| 12             | NIV                | 434                       | 66                        | 4x100                   | 1.2                             |
| 6              | Post-Retisert      | 200                       | 200                       | 4x100                   | 2.0                             |
| 7              | Post-Retisert      | 500                       | 0                         | 4x100                   | 1.0                             |
| 8              | Post-Retisert      | 500                       | 0                         | 4x100                   | 1.0                             |

**Supplemental Table 3. ELISA calibration curves for individual cytokines.**

| <b>AR</b>             |       |       |       |      |           |       |       |        |
|-----------------------|-------|-------|-------|------|-----------|-------|-------|--------|
| Concentration (pg/ml) | 0     | 14    | 41    | 123  | 370       | 1111  | 3333  | 10000  |
| Signal-BKG            | 0     | 22    | 54    | 317  | 1523      | 5057  | 16765 | 25330  |
| Log (Concentration)   |       | 1.14  | 1.61  | 2.09 | 2.57      | 3.05  | 3.52  | 4.00   |
| Log (Signal-BKG)      |       | 1.34  | 1.73  | 2.50 | 3.18      | 3.70  | 4.22  | 4.40   |
| Linear regression     | Slope |       |       |      | Intercept |       |       |        |
| log-log regression    | 4.97  |       |       |      | 0.00      |       |       |        |
|                       | 1.26  |       |       |      | -0.15     |       |       |        |
| <b>BDNF</b>           |       |       |       |      |           |       |       |        |
| Concentration (pg/ml) | 0     | 3     | 8     | 25   | 74        | 222   | 667   | 2000   |
| Signal-BKG            | 0     | 5     | 59    | 183  | 410       | 1429  | 5548  | 19681  |
| Log (Concentration)   |       | 0.44  | 0.92  | 1.39 | 1.87      | 2.35  | 2.82  | 3.30   |
| Log (Signal-BKG)      |       |       | 1.77  | 2.26 | 2.61      | 3.15  | 3.74  | 4.29   |
| Linear regression     | Slope |       |       |      | Intercept |       |       |        |
| log-log regression    | 9.65  |       |       |      | 0.00      |       |       |        |
|                       | 1.05  |       |       |      | 0.75      |       |       |        |
| <b>bFGF</b>           |       |       |       |      |           |       |       |        |
| Concentration (pg/ml) | 0     | 27    | 82    | 247  | 741       | 2222  | 6667  | 20000  |
| Signal-BKG            | 20    | 1     | 16    | 41   | 158       | 1098  | 7731  | 35878  |
| Log (Concentration)   |       | 1.44  | 1.92  | 2.39 | 2.87      | 3.35  | 3.82  | 4.30   |
| Log (Signal-BKG)      |       | 0.00  | 1.19  | 1.61 | 2.20      | 3.04  | 3.89  | 4.55   |
| Linear regression     | Slope |       |       |      | Intercept |       |       |        |
| log-log regression    | 1.71  |       |       |      | 0.00      |       |       |        |
|                       | 1.53  |       |       |      | -2.04     |       |       |        |
| <b>BMP-4</b>          |       |       |       |      |           |       |       |        |
| Concentration (pg/ml) | 0     | 137   | 412   | 1235 | 3704      | 11111 | 33333 | 100000 |
| Signal-BKG            | 0     | 41    | 177   | 578  | 1910      | 4480  | 8418  | 12102  |
| Log (Concentration)   |       | 2.14  | 2.61  | 3.09 | 3.57      | 4.05  | 4.52  | 5.00   |
| Log (Signal-BKG)      |       | 1.62  | 2.25  | 2.76 | 3.28      | 3.65  | 3.93  | 4.08   |
| Linear regression     | Slope |       |       |      | Intercept |       |       |        |
| log-log regression    | 0.42  |       |       |      | 0.00      |       |       |        |
|                       | 1.07  |       |       |      | -0.60     |       |       |        |
| <b>BMP-5</b>          |       |       |       |      |           |       |       |        |
| Concentration (pg/ml) | 0     | 137   | 412   | 1235 | 3704      | 11111 | 33333 | 100000 |
| Signal-BKG            | 0     | 1     | 3     | 8    | 18        | 47    | 212   | 571    |
| Log (Concentration)   |       | 2.14  | 2.61  | 3.09 | 3.57      | 4.05  | 4.52  | 5.00   |
| Log (Signal-BKG)      |       |       | 0.48  | 0.91 | 1.25      | 1.67  | 2.33  | 2.76   |
| Linear regression     | Slope |       |       |      | Intercept |       |       |        |
| log-log regression    | 0.01  |       |       |      | 0.00      |       |       |        |
|                       | 0.96  |       |       |      | -2.10     |       |       |        |
| <b>BMP-7</b>          |       |       |       |      |           |       |       |        |
| Concentration (pg/ml) | 0     | 55    | 165   | 494  | 1481      | 4444  | 13333 | 40000  |
| Signal-BKG            | 19    | 6     | 1     | 11   | 29        | 55    | 257   | 996    |
| Log (Concentration)   |       | 1.74  | 2.22  | 2.69 | 3.17      | 3.65  | 4.12  | 4.60   |
| Log (Signal-BKG)      |       |       |       | 1.05 | 1.46      | 1.74  | 2.41  | 3.00   |
| Linear regression     | Slope |       |       |      | Intercept |       |       |        |
| log-log regression    | 0.02  |       |       |      | 0.00      |       |       |        |
|                       | 1.02  |       |       |      | -1.78     |       |       |        |
| <b>b-NGF</b>          |       |       |       |      |           |       |       |        |
| Concentration (pg/ml) | 0     | 14    | 41    | 123  | 370       | 1111  | 3333  | 10000  |
| Signal-BKG            | 0     | 693   | 1569  | 3920 | 10956     | 28312 | 59033 | 79065  |
| Log (Concentration)   |       | 1.14  | 1.61  | 2.09 | 2.57      | 3.05  | 3.52  | 4.00   |
| Log (Signal-BKG)      |       | 2.84  | 3.20  | 3.59 | 4.04      | 4.45  | 4.77  | 4.90   |
| Linear regression     | Slope |       |       |      | Intercept |       |       |        |
| log-log regression    | 18.63 |       |       |      | 0.00      |       |       |        |
|                       | 0.83  |       |       |      | 1.88      |       |       |        |
| <b>EGF</b>            |       |       |       |      |           |       |       |        |
| Concentration (pg/ml) | 0     | 0     | 1     | 2    | 7         | 22    | 67    | 200    |
| Signal-BKG            | 0     | 9     | 25    | 82   | 262       | 675   | 1878  | 5182   |
| Log (Concentration)   |       | -0.56 | -0.08 | 0.39 | 0.87      | 1.35  | 1.82  | 2.30   |
| Log (Signal-BKG)      |       | 0.94  | 1.39  | 1.92 | 2.42      | 2.83  | 3.27  | 3.71   |

|                       |       |      |      |      |      |       |       |           |
|-----------------------|-------|------|------|------|------|-------|-------|-----------|
| Linear regression     | Slope |      |      |      |      |       |       | Intercept |
| log-log regression    | 26.20 |      |      |      |      |       |       | 0.00      |
|                       | 0.97  |      |      |      |      |       |       | 1.51      |
| <b>EGF R</b>          |       |      |      |      |      |       |       |           |
| Concentration (pg/ml) | 0     | 14   | 41   | 123  | 370  | 1111  | 3333  | 10000     |
| Signal-BKG            | 0     | 21   | 59   | 154  | 530  | 1269  | 3261  | 5588      |
| Log (Concentration)   |       | 1.14 | 1.61 | 2.09 | 2.57 | 3.05  | 3.52  | 4.00      |
| Log (Signal-BKG)      |       | 1.32 | 1.77 | 2.19 | 2.72 | 3.10  | 3.51  | 3.75      |
| Linear regression     | Slope |      |      |      |      |       |       | Intercept |
| log-log regression    | 1.00  |      |      |      |      |       |       | 0.00      |
|                       | 0.93  |      |      |      |      |       |       | 0.27      |
| <b>EG-VEGF</b>        |       |      |      |      |      |       |       |           |
| Concentration (pg/ml) | 0     | 14   | 41   | 123  | 370  | 1111  | 3333  | 10000     |
| Signal-BKG            | 0     | 1    | 22   | 70   | 470  | 1143  | 4311  | 5782      |
| Log (Concentration)   |       | 1.14 | 1.61 | 2.09 | 2.57 | 3.05  | 3.52  | 4.00      |
| Log (Signal-BKG)      |       |      | 1.34 | 1.85 | 2.67 | 3.06  | 3.63  | 3.76      |
| Linear regression     | Slope |      |      |      |      |       |       | Intercept |
| log-log regression    | 1.27  |      |      |      |      |       |       | 0.00      |
|                       | 1.22  |      |      |      |      |       |       | -0.61     |
| <b>FGF-4</b>          |       |      |      |      |      |       |       |           |
| Concentration (pg/ml) | 0     | 137  | 412  | 1235 | 3704 | 11111 | 33333 | 100000    |
| Signal-BKG            | 0     | 16   | 62   | 135  | 455  | 1848  | 4645  | 6441      |
| Log (Concentration)   |       | 2.14 | 2.61 | 3.09 | 3.57 | 4.05  | 4.52  | 5.00      |
| Log (Signal-BKG)      |       | 1.21 | 1.79 | 2.13 | 2.66 | 3.27  | 3.67  | 3.81      |
| Linear regression     | Slope |      |      |      |      |       |       | Intercept |
| log-log regression    | 0.14  |      |      |      |      |       |       | 0.00      |
|                       | 1.03  |      |      |      |      |       |       | -0.98     |
| <b>FGF-7</b>          |       |      |      |      |      |       |       |           |
| Concentration (pg/ml) | 0     | 14   | 41   | 123  | 370  | 1111  | 3333  | 10000     |
| Signal-BKG            | 0     | 104  | 288  | 829  | 2516 | 6643  | 20543 | 28463     |
| Log (Concentration)   |       | 1.14 | 1.61 | 2.09 | 2.57 | 3.05  | 3.52  | 4.00      |
| Log (Signal-BKG)      |       | 2.02 | 2.46 | 2.92 | 3.40 | 3.82  | 4.31  | 4.45      |
| Linear regression     | Slope |      |      |      |      |       |       | Intercept |
| log-log regression    | 6.15  |      |      |      |      |       |       | 0.00      |
|                       | 0.96  |      |      |      |      |       |       | 0.91      |
| <b>GDF-15</b>         |       |      |      |      |      |       |       |           |
| Concentration (pg/ml) | 0     | 3    | 8    | 25   | 74   | 222   | 667   | 2000      |
| Signal-BKG            | 0     | 53   | 188  | 432  | 1230 | 4003  | 11237 | 17827     |
| Log (Concentration)   |       | 0.44 | 0.92 | 1.39 | 1.87 | 2.35  | 2.82  | 3.30      |
| Log (Signal-BKG)      |       | 1.72 | 2.27 | 2.64 | 3.09 | 3.60  | 4.05  | 4.25      |
| Linear regression     | Slope |      |      |      |      |       |       | Intercept |
| log-log regression    | 16.97 |      |      |      |      |       |       | 0.00      |
|                       | 0.96  |      |      |      |      |       |       | 1.33      |
| <b>GDNF</b>           |       |      |      |      |      |       |       |           |
| Concentration (pg/ml) | 0     | 5    | 16   | 49   | 148  | 444   | 1333  | 4000      |
| Signal-BKG            | 0     | 6    | 45   | 87   | 303  | 777   | 2356  | 5392      |
| Log (Concentration)   |       | 0.74 | 1.22 | 1.69 | 2.17 | 2.65  | 3.12  | 3.60      |
| Log (Signal-BKG)      |       | 0.77 | 1.65 | 1.94 | 2.48 | 2.89  | 3.37  | 3.73      |
| Linear regression     | Slope |      |      |      |      |       |       | Intercept |
| log-log regression    | 1.39  |      |      |      |      |       |       | 0.00      |
|                       | 0.99  |      |      |      |      |       |       | 0.25      |
| <b>GH</b>             |       |      |      |      |      |       |       |           |
| Concentration (pg/ml) | 0     | 14   | 41   | 123  | 370  | 1111  | 3333  | 10000     |
| Signal-BKG            | 0     | 61   | 145  | 390  | 1230 | 2879  | 6588  | 11606     |
| Log (Concentration)   |       | 1.14 | 1.61 | 2.09 | 2.57 | 3.05  | 3.52  | 4.00      |
| Log (Signal-BKG)      |       | 1.79 | 2.16 | 2.59 | 3.09 | 3.46  | 3.82  | 4.06      |
| Linear regression     | Slope |      |      |      |      |       |       | Intercept |
| log-log regression    | 2.05  |      |      |      |      |       |       | 0.00      |
|                       | 0.87  |      |      |      |      |       |       | 0.79      |
| <b>HB-EGF</b>         |       |      |      |      |      |       |       |           |
| Concentration (pg/ml) | 0     | 14   | 41   | 123  | 370  | 1111  | 3333  | 10000     |
| Signal-BKG            | 0     | 97   | 164  | 683  | 1434 | 4013  | 6918  | 11626     |
| Log (Concentration)   |       | 1.14 | 1.61 | 2.09 | 2.57 | 3.05  | 3.52  | 4.00      |



|                              |           |             |             |             |             |              |              |               |
|------------------------------|-----------|-------------|-------------|-------------|-------------|--------------|--------------|---------------|
| <b>Log (Signal-BKG)</b>      |           | <b>1.99</b> | <b>2.21</b> | <b>2.83</b> | <b>3.16</b> | <b>3.60</b>  | <b>3.84</b>  | <b>4.07</b>   |
| Linear regression            | Slope     |             |             |             |             | Intercept    |              |               |
| log-log regression           | 3.66      |             |             |             |             | 0.00         |              |               |
|                              | 0.88      |             |             |             |             | 0.93         |              |               |
| <b>HGF</b>                   |           |             |             |             |             |              |              |               |
| <b>Concentration (pg/ml)</b> | <b>0</b>  | <b>5</b>    | <b>16</b>   | <b>49</b>   | <b>148</b>  | <b>444</b>   | <b>1333</b>  | <b>4000</b>   |
| <b>Signal-BKG</b>            | <b>0</b>  | <b>22</b>   | <b>36</b>   | <b>174</b>  | <b>438</b>  | <b>1324</b>  | <b>4418</b>  | <b>13180</b>  |
| <b>Log (Concentration)</b>   |           | <b>0.74</b> | <b>1.22</b> | <b>1.69</b> | <b>2.17</b> | <b>2.65</b>  | <b>3.12</b>  | <b>3.60</b>   |
| <b>Log (Signal-BKG)</b>      |           | <b>1.35</b> | <b>1.55</b> | <b>2.24</b> | <b>2.64</b> | <b>3.12</b>  | <b>3.65</b>  | <b>4.12</b>   |
| Linear regression            | Slope     |             |             |             |             | Intercept    |              |               |
| log-log regression           | 3.29      |             |             |             |             | 0.00         |              |               |
|                              | 1.00      |             |             |             |             | 0.49         |              |               |
| <b>IGFBP-1</b>               |           |             |             |             |             |              |              |               |
| <b>Concentration (pg/ml)</b> | <b>0</b>  | <b>7</b>    | <b>21</b>   | <b>62</b>   | <b>185</b>  | <b>556</b>   | <b>1667</b>  | <b>5000</b>   |
| <b>Signal-BKG</b>            | <b>0</b>  | <b>19</b>   | <b>48</b>   | <b>212</b>  | <b>844</b>  | <b>2972</b>  | <b>10187</b> | <b>18696</b>  |
| <b>Log (Concentration)</b>   |           | <b>0.84</b> | <b>1.31</b> | <b>1.79</b> | <b>2.27</b> | <b>2.74</b>  | <b>3.22</b>  | <b>3.70</b>   |
| <b>Log (Signal-BKG)</b>      |           | <b>1.27</b> | <b>1.68</b> | <b>2.33</b> | <b>2.93</b> | <b>3.47</b>  | <b>4.01</b>  | <b>4.27</b>   |
| Linear regression            | Slope     |             |             |             |             | Intercept    |              |               |
| log-log regression           | 6.02      |             |             |             |             | 0.00         |              |               |
|                              | 1.18      |             |             |             |             | 0.23         |              |               |
| <b>IGFBP-2</b>               |           |             |             |             |             |              |              |               |
| <b>Concentration (pg/ml)</b> | <b>0</b>  | <b>27</b>   | <b>82</b>   | <b>247</b>  | <b>741</b>  | <b>2222</b>  | <b>6667</b>  | <b>20000</b>  |
| <b>Signal-BKG</b>            | <b>0</b>  | <b>7</b>    | <b>38</b>   | <b>111</b>  | <b>494</b>  | <b>1416</b>  | <b>4098</b>  | <b>6593</b>   |
| <b>Log (Concentration)</b>   |           | <b>1.44</b> | <b>1.92</b> | <b>2.39</b> | <b>2.87</b> | <b>3.35</b>  | <b>3.82</b>  | <b>4.30</b>   |
| <b>Log (Signal-BKG)</b>      |           | <b>0.82</b> | <b>1.58</b> | <b>2.05</b> | <b>2.69</b> | <b>3.15</b>  | <b>3.61</b>  | <b>3.82</b>   |
| Linear regression            | Slope     |             |             |             |             | Intercept    |              |               |
| log-log regression           | 0.62      |             |             |             |             | 0.00         |              |               |
|                              | 1.16      |             |             |             |             | -0.73        |              |               |
| <b>IGFBP-3</b>               |           |             |             |             |             |              |              |               |
| <b>Concentration (pg/ml)</b> | <b>0</b>  | <b>274</b>  | <b>823</b>  | <b>2469</b> | <b>7407</b> | <b>22222</b> | <b>66667</b> | <b>200000</b> |
| <b>Signal-BKG</b>            | <b>0</b>  | <b>11</b>   | <b>19</b>   | <b>46</b>   | <b>122</b>  | <b>464</b>   | <b>1319</b>  | <b>3156</b>   |
| <b>Log (Concentration)</b>   |           | <b>2.44</b> | <b>2.92</b> | <b>3.39</b> | <b>3.87</b> | <b>4.35</b>  | <b>4.82</b>  | <b>5.30</b>   |
| <b>Log (Signal-BKG)</b>      |           | <b>1.03</b> | <b>1.28</b> | <b>1.66</b> | <b>2.09</b> | <b>2.67</b>  | <b>3.12</b>  | <b>3.50</b>   |
| Linear regression            | Slope     |             |             |             |             | Intercept    |              |               |
| log-log regression           | 0.02      |             |             |             |             | 0.00         |              |               |
|                              | 0.91      |             |             |             |             | -1.32        |              |               |
| <b>IGFBP-4</b>               |           |             |             |             |             |              |              |               |
| <b>Concentration (pg/ml)</b> | <b>0</b>  | <b>274</b>  | <b>823</b>  | <b>2469</b> | <b>7407</b> | <b>22222</b> | <b>66667</b> | <b>200000</b> |
| <b>Signal-BKG</b>            | <b>21</b> | <b>1</b>    | <b>17</b>   | <b>44</b>   | <b>85</b>   | <b>175</b>   | <b>644</b>   | <b>1915</b>   |
| <b>Log (Concentration)</b>   |           | <b>2.44</b> | <b>2.92</b> | <b>3.39</b> | <b>3.87</b> | <b>4.35</b>  | <b>4.82</b>  | <b>5.30</b>   |
| <b>Log (Signal-BKG)</b>      |           |             | <b>1.24</b> | <b>1.65</b> | <b>1.93</b> | <b>2.24</b>  | <b>2.81</b>  | <b>3.28</b>   |
| Linear regression            | Slope     |             |             |             |             | Intercept    |              |               |
| log-log regression           | 0.01      |             |             |             |             | 0.00         |              |               |
|                              | 0.84      |             |             |             |             | -1.25        |              |               |
| <b>IGFBP-6</b>               |           |             |             |             |             |              |              |               |
| <b>Concentration (pg/ml)</b> | <b>0</b>  | <b>137</b>  | <b>412</b>  | <b>1235</b> | <b>3704</b> | <b>11111</b> | <b>33333</b> | <b>100000</b> |
| <b>Signal-BKG</b>            | <b>0</b>  | <b>43</b>   | <b>84</b>   | <b>214</b>  | <b>587</b>  | <b>1333</b>  | <b>3524</b>  | <b>6445</b>   |
| <b>Log (Concentration)</b>   |           | <b>2.14</b> | <b>2.61</b> | <b>3.09</b> | <b>3.57</b> | <b>4.05</b>  | <b>4.52</b>  | <b>5.00</b>   |
| <b>Log (Signal-BKG)</b>      |           | <b>1.63</b> | <b>1.92</b> | <b>2.33</b> | <b>2.77</b> | <b>3.12</b>  | <b>3.55</b>  | <b>3.81</b>   |
| Linear regression            | Slope     |             |             |             |             | Intercept    |              |               |
| log-log regression           | 0.11      |             |             |             |             | 0.00         |              |               |
|                              | 0.82      |             |             |             |             | -0.16        |              |               |
| <b>IGF-I</b>                 |           |             |             |             |             |              |              |               |
| <b>Concentration (pg/ml)</b> | <b>0</b>  | <b>27</b>   | <b>82</b>   | <b>247</b>  | <b>741</b>  | <b>2222</b>  | <b>6667</b>  | <b>20000</b>  |
| <b>Signal-BKG</b>            | <b>0</b>  | <b>9</b>    | <b>19</b>   | <b>50</b>   | <b>220</b>  | <b>684</b>   | <b>1710</b>  | <b>3885</b>   |
| <b>Log (Concentration)</b>   |           | <b>1.44</b> | <b>1.92</b> | <b>2.39</b> | <b>2.87</b> | <b>3.35</b>  | <b>3.82</b>  | <b>4.30</b>   |
| <b>Log (Signal-BKG)</b>      |           | <b>0.96</b> | <b>1.28</b> | <b>1.70</b> | <b>2.34</b> | <b>2.84</b>  | <b>3.23</b>  | <b>3.59</b>   |
| Linear regression            | Slope     |             |             |             |             | Intercept    |              |               |
| log-log regression           | 0.20      |             |             |             |             | 0.00         |              |               |
|                              | 0.97      |             |             |             |             | -0.50        |              |               |
| <b>Insulin</b>               |           |             |             |             |             |              |              |               |
| <b>Concentration (pg/ml)</b> | <b>0</b>  | <b>27</b>   | <b>82</b>   | <b>247</b>  | <b>741</b>  | <b>2222</b>  | <b>6667</b>  | <b>20000</b>  |
| <b>Signal-BKG</b>            | <b>6</b>  | <b>1</b>    | <b>7</b>    | <b>12</b>   | <b>83</b>   | <b>215</b>   | <b>766</b>   | <b>2334</b>   |

|                              |          |             |             |             |             |              |              |              |
|------------------------------|----------|-------------|-------------|-------------|-------------|--------------|--------------|--------------|
| <b>Log (Concentration)</b>   |          | <b>1.44</b> | <b>1.92</b> | <b>2.39</b> | <b>2.87</b> | <b>3.35</b>  | <b>3.82</b>  | <b>4.30</b>  |
| <b>Log (Signal-BKG)</b>      |          | <b>0.00</b> | <b>0.82</b> | <b>1.07</b> | <b>1.92</b> | <b>2.33</b>  | <b>2.88</b>  | <b>3.37</b>  |
| Linear regression            | Slope    |             |             |             |             | Intercept    |              |              |
| log-log regression           | 0.12     |             |             |             |             | 0.00         |              |              |
|                              | 1.16     |             |             |             |             | -1.56        |              |              |
| <b>MCF R</b>                 |          |             |             |             |             |              |              |              |
| <b>Concentration (pg/ml)</b> | <b>0</b> | <b>55</b>   | <b>165</b>  | <b>494</b>  | <b>1481</b> | <b>4444</b>  | <b>13333</b> | <b>40000</b> |
| <b>Signal-BKG</b>            | <b>0</b> | <b>197</b>  | <b>571</b>  | <b>1547</b> | <b>3747</b> | <b>8726</b>  | <b>23470</b> | <b>42577</b> |
| <b>Log (Concentration)</b>   |          | <b>1.74</b> | <b>2.22</b> | <b>2.69</b> | <b>3.17</b> | <b>3.65</b>  | <b>4.12</b>  | <b>4.60</b>  |
| <b>Log (Signal-BKG)</b>      |          | <b>2.29</b> | <b>2.76</b> | <b>3.19</b> | <b>3.57</b> | <b>3.94</b>  | <b>4.37</b>  | <b>4.63</b>  |
| Linear regression            | Slope    |             |             |             |             | Intercept    |              |              |
| log-log regression           | 1.79     |             |             |             |             | 0.00         |              |              |
|                              | 0.86     |             |             |             |             | 0.84         |              |              |
| <b>NGF R</b>                 |          |             |             |             |             |              |              |              |
| <b>Concentration (pg/ml)</b> | <b>0</b> | <b>14</b>   | <b>41</b>   | <b>123</b>  | <b>370</b>  | <b>1111</b>  | <b>3333</b>  | <b>10000</b> |
| <b>Signal-BKG</b>            | <b>0</b> | <b>48</b>   | <b>78</b>   | <b>236</b>  | <b>617</b>  | <b>1375</b>  | <b>3074</b>  | <b>5815</b>  |
| <b>Log (Concentration)</b>   |          | <b>1.14</b> | <b>1.61</b> | <b>2.09</b> | <b>2.57</b> | <b>3.05</b>  | <b>3.52</b>  | <b>4.00</b>  |
| <b>Log (Signal-BKG)</b>      |          | <b>1.68</b> | <b>1.89</b> | <b>2.37</b> | <b>2.79</b> | <b>3.14</b>  | <b>3.49</b>  | <b>3.76</b>  |
| Linear regression            | Slope    |             |             |             |             | Intercept    |              |              |
| log-log regression           | 0.62     |             |             |             |             | 0.00         |              |              |
|                              | 0.76     |             |             |             |             | 0.77         |              |              |
| <b>NT-3</b>                  |          |             |             |             |             |              |              |              |
| <b>Concentration (pg/ml)</b> | <b>0</b> | <b>55</b>   | <b>165</b>  | <b>494</b>  | <b>1481</b> | <b>4444</b>  | <b>13333</b> | <b>40000</b> |
| <b>Signal-BKG</b>            | <b>0</b> | <b>44</b>   | <b>121</b>  | <b>237</b>  | <b>836</b>  | <b>1975</b>  | <b>8660</b>  | <b>12253</b> |
| <b>Log (Concentration)</b>   |          | <b>1.74</b> | <b>2.22</b> | <b>2.69</b> | <b>3.17</b> | <b>3.65</b>  | <b>4.12</b>  | <b>4.60</b>  |
| <b>Log (Signal-BKG)</b>      |          | <b>1.65</b> | <b>2.08</b> | <b>2.38</b> | <b>2.92</b> | <b>3.30</b>  | <b>3.94</b>  | <b>4.09</b>  |
| Linear regression            | Slope    |             |             |             |             | Intercept    |              |              |
| log-log regression           | 0.34     |             |             |             |             | 0.00         |              |              |
|                              | 0.89     |             |             |             |             | 0.07         |              |              |
| <b>NT-4</b>                  |          |             |             |             |             |              |              |              |
| <b>Concentration (pg/ml)</b> | <b>0</b> | <b>14</b>   | <b>41</b>   | <b>123</b>  | <b>370</b>  | <b>1111</b>  | <b>3333</b>  | <b>10000</b> |
| <b>Signal-BKG</b>            | <b>0</b> | <b>1</b>    | <b>43</b>   | <b>106</b>  | <b>432</b>  | <b>1066</b>  | <b>2883</b>  | <b>3144</b>  |
| <b>Log (Concentration)</b>   |          | <b>1.14</b> | <b>1.61</b> | <b>2.09</b> | <b>2.57</b> | <b>3.05</b>  | <b>3.52</b>  | <b>4.00</b>  |
| <b>Log (Signal-BKG)</b>      |          |             | <b>1.63</b> | <b>2.02</b> | <b>2.64</b> | <b>3.03</b>  | <b>3.46</b>  | <b>3.50</b>  |
| Linear regression            | Slope    |             |             |             |             | Intercept    |              |              |
| log-log regression           | 0.88     |             |             |             |             | 0.00         |              |              |
|                              | 0.98     |             |             |             |             | 0.04         |              |              |
| <b>OPG</b>                   |          |             |             |             |             |              |              |              |
| <b>Concentration (pg/ml)</b> | <b>0</b> | <b>5</b>    | <b>16</b>   | <b>49</b>   | <b>148</b>  | <b>444</b>   | <b>1333</b>  | <b>4000</b>  |
| <b>Signal-BKG</b>            | <b>0</b> | <b>29</b>   | <b>64</b>   | <b>188</b>  | <b>561</b>  | <b>1369</b>  | <b>4024</b>  | <b>9882</b>  |
| <b>Log (Concentration)</b>   |          | <b>0.74</b> | <b>1.22</b> | <b>1.69</b> | <b>2.17</b> | <b>2.65</b>  | <b>3.12</b>  | <b>3.60</b>  |
| <b>Log (Signal-BKG)</b>      |          | <b>1.46</b> | <b>1.81</b> | <b>2.27</b> | <b>2.75</b> | <b>3.14</b>  | <b>3.60</b>  | <b>3.99</b>  |
| Linear regression            | Slope    |             |             |             |             | Intercept    |              |              |
| log-log regression           | 2.53     |             |             |             |             | 0.00         |              |              |
|                              | 0.90     |             |             |             |             | 0.76         |              |              |
| <b>PDGF-AA</b>               |          |             |             |             |             |              |              |              |
| <b>Concentration (pg/ml)</b> | <b>0</b> | <b>14</b>   | <b>41</b>   | <b>123</b>  | <b>370</b>  | <b>1111</b>  | <b>3333</b>  | <b>10000</b> |
| <b>Signal-BKG</b>            | <b>0</b> | <b>303</b>  | <b>828</b>  | <b>1842</b> | <b>6451</b> | <b>10749</b> | <b>30057</b> | <b>44607</b> |
| <b>Log (Concentration)</b>   |          | <b>1.14</b> | <b>1.61</b> | <b>2.09</b> | <b>2.57</b> | <b>3.05</b>  | <b>3.52</b>  | <b>4.00</b>  |
| <b>Log (Signal-BKG)</b>      |          | <b>2.48</b> | <b>2.92</b> | <b>3.27</b> | <b>3.81</b> | <b>4.03</b>  | <b>4.48</b>  | <b>4.65</b>  |
| Linear regression            | Slope    |             |             |             |             | Intercept    |              |              |
| log-log regression           | 9.18     |             |             |             |             | 0.00         |              |              |
|                              | 0.83     |             |             |             |             | 1.56         |              |              |
| <b>PIGF</b>                  |          |             |             |             |             |              |              |              |
| <b>Concentration (pg/ml)</b> | <b>0</b> | <b>5</b>    | <b>16</b>   | <b>49</b>   | <b>148</b>  | <b>444</b>   | <b>1333</b>  | <b>4000</b>  |
| <b>Signal-BKG</b>            | <b>0</b> | <b>148</b>  | <b>466</b>  | <b>1443</b> | <b>4140</b> | <b>8444</b>  | <b>20920</b> | <b>30318</b> |
| <b>Log (Concentration)</b>   |          | <b>0.74</b> | <b>1.22</b> | <b>1.69</b> | <b>2.17</b> | <b>2.65</b>  | <b>3.12</b>  | <b>3.60</b>  |
| <b>Log (Signal-BKG)</b>      |          | <b>2.17</b> | <b>2.67</b> | <b>3.16</b> | <b>3.62</b> | <b>3.93</b>  | <b>4.32</b>  | <b>4.48</b>  |
| Linear regression            | Slope    |             |             |             |             | Intercept    |              |              |
| log-log regression           | 16.17    |             |             |             |             | 0.00         |              |              |
|                              | 0.90     |             |             |             |             | 1.58         |              |              |
| <b>SCF</b>                   |          |             |             |             |             |              |              |              |
| <b>Concentration (pg/ml)</b> | <b>0</b> | <b>14</b>   | <b>41</b>   | <b>123</b>  | <b>370</b>  | <b>1111</b>  | <b>3333</b>  | <b>10000</b> |

|                              |          |             |             |             |              |              |              |               |
|------------------------------|----------|-------------|-------------|-------------|--------------|--------------|--------------|---------------|
| <b>Signal-BKG</b>            | <b>0</b> | <b>736</b>  | <b>1802</b> | <b>4843</b> | <b>11752</b> | <b>22582</b> | <b>39008</b> | <b>49162</b>  |
| <b>Log (Concentration)</b>   |          | <b>1.14</b> | <b>1.61</b> | <b>2.09</b> | <b>2.57</b>  | <b>3.05</b>  | <b>3.52</b>  | <b>4.00</b>   |
| <b>Log (Signal-BKG)</b>      |          | <b>2.87</b> | <b>3.26</b> | <b>3.69</b> | <b>4.07</b>  | <b>4.35</b>  | <b>4.59</b>  | <b>4.69</b>   |
| Linear regression            | Slope    | 21.69       |             |             | Intercept    | 0.00         |              |               |
| log-log regression           |          | 0.79        |             |             |              | 1.99         |              |               |
| <b>SCF R</b>                 |          |             |             |             |              |              |              |               |
| <b>Concentration (pg/ml)</b> | <b>0</b> | <b>27</b>   | <b>82</b>   | <b>247</b>  | <b>741</b>   | <b>2222</b>  | <b>6667</b>  | <b>20000</b>  |
| <b>Signal-BKG</b>            | <b>0</b> | <b>30</b>   | <b>89</b>   | <b>434</b>  | <b>1313</b>  | <b>3922</b>  | <b>13490</b> | <b>33890</b>  |
| <b>Log (Concentration)</b>   |          | <b>1.44</b> | <b>1.92</b> | <b>2.39</b> | <b>2.87</b>  | <b>3.35</b>  | <b>3.82</b>  | <b>4.30</b>   |
| <b>Log (Signal-BKG)</b>      |          | <b>1.48</b> | <b>1.95</b> | <b>2.64</b> | <b>3.12</b>  | <b>3.59</b>  | <b>4.13</b>  | <b>4.53</b>   |
| Linear regression            | Slope    | 1.73        |             |             | Intercept    | 0.00         |              |               |
| log-log regression           |          | 1.08        |             |             |              | -0.04        |              |               |
| <b>TGFa</b>                  |          |             |             |             |              |              |              |               |
| <b>Concentration (pg/ml)</b> | <b>0</b> | <b>14</b>   | <b>41</b>   | <b>123</b>  | <b>370</b>   | <b>1111</b>  | <b>3333</b>  | <b>10000</b>  |
| <b>Signal-BKG</b>            | <b>0</b> | <b>26</b>   | <b>112</b>  | <b>332</b>  | <b>764</b>   | <b>1156</b>  | <b>1994</b>  | <b>2133</b>   |
| <b>Log (Concentration)</b>   |          | <b>1.14</b> | <b>1.61</b> | <b>2.09</b> | <b>2.57</b>  | <b>3.05</b>  | <b>3.52</b>  | <b>4.00</b>   |
| <b>Log (Signal-BKG)</b>      |          | <b>1.42</b> | <b>2.05</b> | <b>2.52</b> | <b>2.88</b>  | <b>3.06</b>  | <b>3.30</b>  | <b>3.33</b>   |
| Linear regression            | Slope    | 2.13        |             |             | Intercept    | 0.00         |              |               |
| log-log regression           |          | 1.02        |             |             |              | 0.33         |              |               |
| <b>TGFb1</b>                 |          |             |             |             |              |              |              |               |
| <b>Concentration (pg/ml)</b> | <b>0</b> | <b>137</b>  | <b>412</b>  | <b>1235</b> | <b>3704</b>  | <b>11111</b> | <b>33333</b> | <b>100000</b> |
| <b>Signal-BKG</b>            | <b>0</b> | <b>2</b>    | <b>20</b>   | <b>85</b>   | <b>219</b>   | <b>648</b>   | <b>1949</b>  | <b>6482</b>   |
| <b>Log (Concentration)</b>   |          | <b>2.14</b> | <b>2.61</b> | <b>3.09</b> | <b>3.57</b>  | <b>4.05</b>  | <b>4.52</b>  | <b>5.00</b>   |
| <b>Log (Signal-BKG)</b>      |          |             | <b>1.31</b> | <b>1.93</b> | <b>2.34</b>  | <b>2.81</b>  | <b>3.29</b>  | <b>3.81</b>   |
| Linear regression            | Slope    | 0.06        |             |             | Intercept    | 0.00         |              |               |
| log-log regression           |          | 1.02        |             |             |              | -1.31        |              |               |
| <b>TGFb3</b>                 |          |             |             |             |              |              |              |               |
| <b>Concentration (pg/ml)</b> | <b>0</b> | <b>55</b>   | <b>165</b>  | <b>494</b>  | <b>1481</b>  | <b>4444</b>  | <b>13333</b> | <b>40000</b>  |
| <b>Signal-BKG</b>            | <b>0</b> | <b>58</b>   | <b>126</b>  | <b>395</b>  | <b>1213</b>  | <b>3494</b>  | <b>10492</b> | <b>13620</b>  |
| <b>Log (Concentration)</b>   |          | <b>1.74</b> | <b>2.22</b> | <b>2.69</b> | <b>3.17</b>  | <b>3.65</b>  | <b>4.12</b>  | <b>4.60</b>   |
| <b>Log (Signal-BKG)</b>      |          | <b>1.76</b> | <b>2.10</b> | <b>2.60</b> | <b>3.08</b>  | <b>3.54</b>  | <b>4.02</b>  | <b>4.13</b>   |
| Linear regression            | Slope    | 0.79        |             |             | Intercept    | 0.00         |              |               |
| log-log regression           |          | 0.96        |             |             |              | 0.02         |              |               |
| <b>VEGF</b>                  |          |             |             |             |              |              |              |               |
| <b>Concentration (pg/ml)</b> | <b>0</b> | <b>14</b>   | <b>41</b>   | <b>123</b>  | <b>370</b>   | <b>1111</b>  | <b>3333</b>  | <b>10000</b>  |
| <b>Signal-BKG</b>            | <b>0</b> | <b>16</b>   | <b>35</b>   | <b>78</b>   | <b>142</b>   | <b>365</b>   | <b>1366</b>  | <b>4741</b>   |
| <b>Log (Concentration)</b>   |          | <b>1.14</b> | <b>1.61</b> | <b>2.09</b> | <b>2.57</b>  | <b>3.05</b>  | <b>3.52</b>  | <b>4.00</b>   |
| <b>Log (Signal-BKG)</b>      |          | <b>1.20</b> | <b>1.54</b> | <b>1.89</b> | <b>2.15</b>  | <b>2.56</b>  | <b>3.14</b>  | <b>3.68</b>   |
| Linear regression            | Slope    | 0.47        |             |             | Intercept    | 0.00         |              |               |
| log-log regression           |          | 0.85        |             |             |              | 0.13         |              |               |
| <b>VEGF R2</b>               |          |             |             |             |              |              |              |               |
| <b>Concentration (pg/ml)</b> | <b>0</b> | <b>14</b>   | <b>41</b>   | <b>123</b>  | <b>370</b>   | <b>1111</b>  | <b>3333</b>  | <b>10000</b>  |
| <b>Signal-BKG</b>            | <b>0</b> | <b>140</b>  | <b>208</b>  | <b>715</b>  | <b>1501</b>  | <b>3641</b>  | <b>10086</b> | <b>21814</b>  |
| <b>Log (Concentration)</b>   |          | <b>1.14</b> | <b>1.61</b> | <b>2.09</b> | <b>2.57</b>  | <b>3.05</b>  | <b>3.52</b>  | <b>4.00</b>   |
| <b>Log (Signal-BKG)</b>      |          | <b>2.15</b> | <b>2.32</b> | <b>2.85</b> | <b>3.18</b>  | <b>3.56</b>  | <b>4.00</b>  | <b>4.34</b>   |
| Linear regression            | Slope    | 2.28        |             |             | Intercept    | 0.00         |              |               |
| log-log regression           |          | 0.80        |             |             |              | 1.15         |              |               |
| <b>VEGF R3</b>               |          |             |             |             |              |              |              |               |
| <b>Concentration (pg/ml)</b> | <b>0</b> | <b>55</b>   | <b>165</b>  | <b>494</b>  | <b>1481</b>  | <b>4444</b>  | <b>13333</b> | <b>40000</b>  |
| <b>Signal-BKG</b>            | <b>0</b> | <b>183</b>  | <b>349</b>  | <b>946</b>  | <b>2732</b>  | <b>6539</b>  | <b>21873</b> | <b>51976</b>  |
| <b>Log (Concentration)</b>   |          | <b>1.74</b> | <b>2.22</b> | <b>2.69</b> | <b>3.17</b>  | <b>3.65</b>  | <b>4.12</b>  | <b>4.60</b>   |
| <b>Log (Signal-BKG)</b>      |          | <b>2.26</b> | <b>2.54</b> | <b>2.98</b> | <b>3.44</b>  | <b>3.82</b>  | <b>4.34</b>  | <b>4.72</b>   |
| Linear regression            | Slope    | 1.34        |             |             | Intercept    | 0.00         |              |               |
| log-log regression           |          | 0.88        |             |             |              | 0.64         |              |               |
| <b>VEGF-D</b>                |          |             |             |             |              |              |              |               |

|                              |          |             |             |             |             |              |              |               |
|------------------------------|----------|-------------|-------------|-------------|-------------|--------------|--------------|---------------|
| <b>Concentration (pg/ml)</b> | <b>0</b> | <b>27</b>   | <b>82</b>   | <b>247</b>  | <b>741</b>  | <b>2222</b>  | <b>6667</b>  | <b>20000</b>  |
| <b>Signal-BKG</b>            | <b>0</b> | <b>32</b>   | <b>101</b>  | <b>235</b>  | <b>538</b>  | <b>1278</b>  | <b>3082</b>  | <b>5350</b>   |
| <b>Log (Concentration)</b>   |          | <b>1.44</b> | <b>1.92</b> | <b>2.39</b> | <b>2.87</b> | <b>3.35</b>  | <b>3.82</b>  | <b>4.30</b>   |
| <b>Log (Signal-BKG)</b>      |          | <b>1.50</b> | <b>2.01</b> | <b>2.37</b> | <b>2.73</b> | <b>3.11</b>  | <b>3.49</b>  | <b>3.73</b>   |
| Linear regression            | Slope    |             |             |             |             | Intercept    |              |               |
| log-log regression           | 0.48     |             |             |             |             | 0.00         |              |               |
|                              | 0.82     |             |             |             |             | 0.39         |              |               |
| <b>6Ckine</b>                |          |             |             |             |             |              |              |               |
| <b>Concentration (pg/ml)</b> | <b>0</b> | <b>55</b>   | <b>165</b>  | <b>494</b>  | <b>1481</b> | <b>4444</b>  | <b>13333</b> | <b>40000</b>  |
| <b>Signal-BKG</b>            | <b>0</b> | <b>13</b>   | <b>57</b>   | <b>176</b>  | <b>628</b>  | <b>1824</b>  | <b>6803</b>  | <b>12401</b>  |
| <b>Log (Concentration)</b>   |          | <b>1.74</b> | <b>2.22</b> | <b>2.69</b> | <b>3.17</b> | <b>3.65</b>  | <b>4.12</b>  | <b>4.60</b>   |
| <b>Log (Signal-BKG)</b>      |          | <b>1.11</b> | <b>1.75</b> | <b>2.24</b> | <b>2.80</b> | <b>3.26</b>  | <b>3.83</b>  | <b>4.09</b>   |
| Linear regression            | Slope    |             |             |             |             | Intercept    |              |               |
| log-log regression           | 0.50     |             |             |             |             | 0.00         |              |               |
|                              | 1.12     |             |             |             |             | -0.78        |              |               |
| <b>Axl</b>                   |          |             |             |             |             |              |              |               |
| <b>Concentration (pg/ml)</b> | <b>0</b> | <b>5</b>    | <b>16</b>   | <b>49</b>   | <b>148</b>  | <b>444</b>   | <b>1333</b>  | <b>4000</b>   |
| <b>Signal-BKG</b>            | <b>0</b> | <b>81</b>   | <b>150</b>  | <b>427</b>  | <b>654</b>  | <b>1376</b>  | <b>3079</b>  | <b>6821</b>   |
| <b>Log (Concentration)</b>   |          | <b>0.74</b> | <b>1.22</b> | <b>1.69</b> | <b>2.17</b> | <b>2.65</b>  | <b>3.12</b>  | <b>3.60</b>   |
| <b>Log (Signal-BKG)</b>      |          | <b>1.91</b> | <b>2.18</b> | <b>2.63</b> | <b>2.82</b> | <b>3.14</b>  | <b>3.49</b>  | <b>3.83</b>   |
| Linear regression            | Slope    |             |             |             |             | Intercept    |              |               |
| log-log regression           | 1.78     |             |             |             |             | 0.00         |              |               |
|                              | 0.67     |             |             |             |             | 1.41         |              |               |
| <b>BTC</b>                   |          |             |             |             |             |              |              |               |
| <b>Concentration (pg/ml)</b> | <b>0</b> | <b>137</b>  | <b>412</b>  | <b>1235</b> | <b>3704</b> | <b>11111</b> | <b>33333</b> | <b>100000</b> |
| <b>Signal-BKG</b>            | <b>0</b> | <b>30</b>   | <b>37</b>   | <b>33</b>   | <b>60</b>   | <b>98</b>    | <b>366</b>   | <b>724</b>    |
| <b>Log (Concentration)</b>   |          | <b>2.14</b> | <b>2.61</b> | <b>3.09</b> | <b>3.57</b> | <b>4.05</b>  | <b>4.52</b>  | <b>5.00</b>   |
| <b>Log (Signal-BKG)</b>      |          |             | <b>1.52</b> | <b>1.77</b> | <b>1.99</b> | <b>2.56</b>  | <b>2.86</b>  |               |
| Linear regression            | Slope    |             |             |             |             | Intercept    |              |               |
| log-log regression           | 0.01     |             |             |             |             | 0.00         |              |               |
|                              | 0.73     |             |             |             |             | -0.80        |              |               |
| <b>CCL28</b>                 |          |             |             |             |             |              |              |               |
| <b>Concentration (pg/ml)</b> | <b>0</b> | <b>55</b>   | <b>165</b>  | <b>494</b>  | <b>1481</b> | <b>4444</b>  | <b>13333</b> | <b>40000</b>  |
| <b>Signal-BKG</b>            | <b>0</b> | <b>32</b>   | <b>55</b>   | <b>118</b>  | <b>758</b>  | <b>1383</b>  | <b>4939</b>  | <b>13262</b>  |
| <b>Log (Concentration)</b>   |          | <b>1.74</b> | <b>2.22</b> | <b>2.69</b> | <b>3.17</b> | <b>3.65</b>  | <b>4.12</b>  | <b>4.60</b>   |
| <b>Log (Signal-BKG)</b>      |          | <b>1.50</b> | <b>1.74</b> | <b>2.07</b> | <b>2.88</b> | <b>3.14</b>  | <b>3.69</b>  | <b>4.12</b>   |
| Linear regression            | Slope    |             |             |             |             | Intercept    |              |               |
| log-log regression           | 0.34     |             |             |             |             | 0.00         |              |               |
|                              | 0.96     |             |             |             |             | -0.31        |              |               |
| <b>CTACK</b>                 |          |             |             |             |             |              |              |               |
| <b>Concentration (pg/ml)</b> | <b>0</b> | <b>69</b>   | <b>206</b>  | <b>617</b>  | <b>1852</b> | <b>5556</b>  | <b>16667</b> | <b>50000</b>  |
| <b>Signal-BKG</b>            | <b>0</b> | <b>162</b>  | <b>396</b>  | <b>1401</b> | <b>2378</b> | <b>3934</b>  | <b>5467</b>  | <b>7619</b>   |
| <b>Log (Concentration)</b>   |          | <b>1.84</b> | <b>2.31</b> | <b>2.79</b> | <b>3.27</b> | <b>3.74</b>  | <b>4.22</b>  | <b>4.70</b>   |
| <b>Log (Signal-BKG)</b>      |          | <b>2.21</b> | <b>2.60</b> | <b>3.15</b> | <b>3.38</b> | <b>3.59</b>  | <b>3.74</b>  | <b>3.88</b>   |
| Linear regression            | Slope    |             |             |             |             | Intercept    |              |               |
| log-log regression           | 0.78     |             |             |             |             | 0.00         |              |               |
|                              | 0.74     |             |             |             |             | 0.91         |              |               |
| <b>CXCL16</b>                |          |             |             |             |             |              |              |               |
| <b>Concentration (pg/ml)</b> | <b>0</b> | <b>27</b>   | <b>82</b>   | <b>247</b>  | <b>741</b>  | <b>2222</b>  | <b>6667</b>  | <b>20000</b>  |
| <b>Signal-BKG</b>            | <b>0</b> | <b>137</b>  | <b>306</b>  | <b>801</b>  | <b>2349</b> | <b>4890</b>  | <b>12358</b> | <b>13489</b>  |
| <b>Log (Concentration)</b>   |          | <b>1.44</b> | <b>1.92</b> | <b>2.39</b> | <b>2.87</b> | <b>3.35</b>  | <b>3.82</b>  | <b>4.30</b>   |
| <b>Log (Signal-BKG)</b>      |          | <b>2.14</b> | <b>2.49</b> | <b>2.90</b> | <b>3.37</b> | <b>3.69</b>  | <b>4.09</b>  | <b>4.13</b>   |
| Linear regression            | Slope    |             |             |             |             | Intercept    |              |               |
| log-log regression           | 1.90     |             |             |             |             | 0.00         |              |               |
|                              | 0.83     |             |             |             |             | 0.93         |              |               |
| <b>ENA-78</b>                |          |             |             |             |             |              |              |               |
| <b>Concentration (pg/ml)</b> | <b>0</b> | <b>14</b>   | <b>41</b>   | <b>123</b>  | <b>370</b>  | <b>1111</b>  | <b>3333</b>  | <b>10000</b>  |
| <b>Signal-BKG</b>            | <b>0</b> | <b>24</b>   | <b>80</b>   | <b>319</b>  | <b>1154</b> | <b>3107</b>  | <b>7695</b>  | <b>10005</b>  |
| <b>Log (Concentration)</b>   |          | <b>1.14</b> | <b>1.61</b> | <b>2.09</b> | <b>2.57</b> | <b>3.05</b>  | <b>3.52</b>  | <b>4.00</b>   |
| <b>Log (Signal-BKG)</b>      |          | <b>1.38</b> | <b>1.90</b> | <b>2.50</b> | <b>3.06</b> | <b>3.49</b>  | <b>3.89</b>  | <b>4.00</b>   |
| Linear regression            | Slope    |             |             |             |             | Intercept    |              |               |
| log-log regression           | 2.37     |             |             |             |             | 0.00         |              |               |
|                              | 1.07     |             |             |             |             | 0.21         |              |               |

| <b>Eotaxin-3</b>             |          |             |             |             |             |              |              |               |
|------------------------------|----------|-------------|-------------|-------------|-------------|--------------|--------------|---------------|
| <b>Concentration (pg/ml)</b> | <b>0</b> | <b>27</b>   | <b>82</b>   | <b>247</b>  | <b>741</b>  | <b>2222</b>  | <b>6667</b>  | <b>20000</b>  |
| <b>Signal-BKG</b>            | <b>0</b> | <b>28</b>   | <b>65</b>   | <b>109</b>  | <b>372</b>  | <b>659</b>   | <b>1986</b>  | <b>3842</b>   |
| <b>Log (Concentration)</b>   |          | <b>1.44</b> | <b>1.92</b> | <b>2.39</b> | <b>2.87</b> | <b>3.35</b>  | <b>3.82</b>  | <b>4.30</b>   |
| <b>Log (Signal-BKG)</b>      |          | <b>1.45</b> | <b>1.81</b> | <b>2.04</b> | <b>2.57</b> | <b>2.82</b>  | <b>3.30</b>  | <b>3.58</b>   |
| Linear regression            | Slope    |             |             |             |             | Intercept    |              |               |
| log-log regression           | 0.20     |             |             |             |             | 0.00         |              |               |
|                              | 0.76     |             |             |             |             | 0.33         |              |               |
| <b>GCP-2</b>                 |          |             |             |             |             |              |              |               |
| <b>Concentration (pg/ml)</b> | <b>0</b> | <b>14</b>   | <b>41</b>   | <b>123</b>  | <b>370</b>  | <b>1111</b>  | <b>3333</b>  | <b>10000</b>  |
| <b>Signal-BKG</b>            | <b>0</b> | <b>47</b>   | <b>111</b>  | <b>456</b>  | <b>1243</b> | <b>2573</b>  | <b>5291</b>  | <b>6960</b>   |
| <b>Log (Concentration)</b>   |          | <b>1.14</b> | <b>1.61</b> | <b>2.09</b> | <b>2.57</b> | <b>3.05</b>  | <b>3.52</b>  | <b>4.00</b>   |
| <b>Log (Signal-BKG)</b>      |          | <b>1.67</b> | <b>2.05</b> | <b>2.66</b> | <b>3.09</b> | <b>3.41</b>  | <b>3.72</b>  | <b>3.84</b>   |
| Linear regression            | Slope    |             |             |             |             | Intercept    |              |               |
| log-log regression           | 1.68     |             |             |             |             | 0.00         |              |               |
|                              | 0.89     |             |             |             |             | 0.70         |              |               |
| <b>GRO</b>                   |          |             |             |             |             |              |              |               |
| <b>Concentration (pg/ml)</b> | <b>0</b> | <b>1</b>    | <b>4</b>    | <b>12</b>   | <b>37</b>   | <b>111</b>   | <b>333</b>   | <b>1000</b>   |
| <b>Signal-BKG</b>            | <b>0</b> | <b>57</b>   | <b>132</b>  | <b>232</b>  | <b>309</b>  | <b>720</b>   | <b>2188</b>  | <b>4751</b>   |
| <b>Log (Concentration)</b>   |          | <b>0.14</b> | <b>0.61</b> | <b>1.09</b> | <b>1.57</b> | <b>2.05</b>  | <b>2.52</b>  | <b>3.00</b>   |
| <b>Log (Signal-BKG)</b>      |          | <b>1.75</b> | <b>2.12</b> | <b>2.37</b> | <b>2.49</b> | <b>2.86</b>  | <b>3.34</b>  | <b>3.68</b>   |
| Linear regression            | Slope    |             |             |             |             | Intercept    |              |               |
| log-log regression           | 4.96     |             |             |             |             | 0.00         |              |               |
|                              | 0.65     |             |             |             |             | 1.64         |              |               |
| <b>HCC-1</b>                 |          |             |             |             |             |              |              |               |
| <b>Concentration (pg/ml)</b> | <b>0</b> | <b>5</b>    | <b>16</b>   | <b>49</b>   | <b>148</b>  | <b>444</b>   | <b>1333</b>  | <b>4000</b>   |
| <b>Signal-BKG</b>            | <b>0</b> | <b>41</b>   | <b>116</b>  | <b>603</b>  | <b>1417</b> | <b>2519</b>  | <b>4990</b>  | <b>5786</b>   |
| <b>Log (Concentration)</b>   |          | <b>0.74</b> | <b>1.22</b> | <b>1.69</b> | <b>2.17</b> | <b>2.65</b>  | <b>3.12</b>  | <b>3.60</b>   |
| <b>Log (Signal-BKG)</b>      |          | <b>1.62</b> | <b>2.06</b> | <b>2.78</b> | <b>3.15</b> | <b>3.40</b>  | <b>3.70</b>  | <b>3.76</b>   |
| Linear regression            | Slope    |             |             |             |             | Intercept    |              |               |
| log-log regression           | 4.01     |             |             |             |             | 0.00         |              |               |
|                              | 0.89     |             |             |             |             | 1.07         |              |               |
| <b>HCC-4</b>                 |          |             |             |             |             |              |              |               |
| <b>Concentration (pg/ml)</b> | <b>0</b> | <b>14</b>   | <b>41</b>   | <b>123</b>  | <b>370</b>  | <b>1111</b>  | <b>3333</b>  | <b>10000</b>  |
| <b>Signal-BKG</b>            | <b>0</b> | <b>135</b>  | <b>445</b>  | <b>1393</b> | <b>2899</b> | <b>4691</b>  | <b>6835</b>  | <b>7093</b>   |
| <b>Log (Concentration)</b>   |          | <b>1.14</b> | <b>1.61</b> | <b>2.09</b> | <b>2.57</b> | <b>3.05</b>  | <b>3.52</b>  | <b>4.00</b>   |
| <b>Log (Signal-BKG)</b>      |          | <b>2.13</b> | <b>2.65</b> | <b>3.14</b> | <b>3.46</b> | <b>3.67</b>  | <b>3.83</b>  | <b>3.85</b>   |
| Linear regression            | Slope    |             |             |             |             | Intercept    |              |               |
| log-log regression           | 2.34     |             |             |             |             | 0.00         |              |               |
|                              | 0.71     |             |             |             |             | 1.49         |              |               |
| <b>IL-9</b>                  |          |             |             |             |             |              |              |               |
| <b>Concentration (pg/ml)</b> | <b>0</b> | <b>274</b>  | <b>823</b>  | <b>2469</b> | <b>7407</b> | <b>22222</b> | <b>66667</b> | <b>200000</b> |
| <b>Signal-BKG</b>            | <b>0</b> | <b>45</b>   | <b>79</b>   | <b>113</b>  | <b>268</b>  | <b>597</b>   | <b>1208</b>  | <b>1650</b>   |
| <b>Log (Concentration)</b>   |          | <b>2.44</b> | <b>2.92</b> | <b>3.39</b> | <b>3.87</b> | <b>4.35</b>  | <b>4.82</b>  | <b>5.30</b>   |
| <b>Log (Signal-BKG)</b>      |          | <b>1.65</b> | <b>1.90</b> | <b>2.05</b> | <b>2.43</b> | <b>2.78</b>  | <b>3.08</b>  | <b>3.22</b>   |
| Linear regression            | Slope    |             |             |             |             | Intercept    |              |               |
| log-log regression           | 0.02     |             |             |             |             | 0.00         |              |               |
|                              | 0.61     |             |             |             |             | 0.10         |              |               |
| <b>IL-17F</b>                |          |             |             |             |             |              |              |               |
| <b>Concentration (pg/ml)</b> | <b>0</b> | <b>137</b>  | <b>412</b>  | <b>1235</b> | <b>3704</b> | <b>11111</b> | <b>33333</b> | <b>100000</b> |
| <b>Signal-BKG</b>            | <b>0</b> | <b>378</b>  | <b>765</b>  | <b>1364</b> | <b>2574</b> | <b>3368</b>  | <b>8008</b>  | <b>11721</b>  |
| <b>Log (Concentration)</b>   |          | <b>2.14</b> | <b>2.61</b> | <b>3.09</b> | <b>3.57</b> | <b>4.05</b>  | <b>4.52</b>  | <b>5.00</b>   |
| <b>Log (Signal-BKG)</b>      |          | <b>2.58</b> | <b>2.88</b> | <b>3.13</b> | <b>3.41</b> | <b>3.53</b>  | <b>3.90</b>  | <b>4.07</b>   |
| Linear regression            | Slope    |             |             |             |             | Intercept    |              |               |
| log-log regression           | 0.13     |             |             |             |             | 0.00         |              |               |
|                              | 0.52     |             |             |             |             | 1.51         |              |               |
| <b>IL-18 BPa</b>             |          |             |             |             |             |              |              |               |
| <b>Concentration (pg/ml)</b> | <b>0</b> | <b>82</b>   | <b>247</b>  | <b>741</b>  | <b>2222</b> | <b>6667</b>  | <b>20000</b> | <b>60000</b>  |
| <b>Signal-BKG</b>            | <b>0</b> | <b>71</b>   | <b>248</b>  | <b>364</b>  | <b>1544</b> | <b>3277</b>  | <b>8103</b>  | <b>11440</b>  |
| <b>Log (Concentration)</b>   |          | <b>1.92</b> | <b>2.39</b> | <b>2.87</b> | <b>3.35</b> | <b>3.82</b>  | <b>4.30</b>  | <b>4.78</b>   |
| <b>Log (Signal-BKG)</b>      |          | <b>1.85</b> | <b>2.39</b> | <b>2.56</b> | <b>3.19</b> | <b>3.52</b>  | <b>3.91</b>  | <b>4.06</b>   |
| Linear regression            | Slope    |             |             |             |             | Intercept    |              |               |
|                              | 0.42     |             |             |             |             | 0.00         |              |               |

|                       |       |      |      |      |           |       |       |        |
|-----------------------|-------|------|------|------|-----------|-------|-------|--------|
| log-log regression    | 0.85  |      |      |      | 0.25      |       |       |        |
| <b>IL-28A</b>         |       |      |      |      |           |       |       |        |
| Concentration (pg/ml) | 0     | 14   | 41   | 123  | 370       | 1111  | 3333  | 10000  |
| Signal-BKG            | 9     | 1    | 25   | 125  | 579       | 1029  | 3598  | 5884   |
| Log (Concentration)   |       | 1.14 | 1.61 | 2.09 | 2.57      | 3.05  | 3.52  | 4.00   |
| Log (Signal-BKG)      |       |      | 1.40 | 2.10 | 2.76      | 3.01  | 3.56  | 3.77   |
| Linear regression     | Slope |      |      |      | Intercept |       |       |        |
| log-log regression    | 1.07  |      |      |      | 0.00      |       |       |        |
|                       | 1.10  |      |      |      | -0.25     |       |       |        |
| <b>IL-29</b>          |       |      |      |      |           |       |       |        |
| Concentration (pg/ml) | 0     | 137  | 412  | 1235 | 3704      | 11111 | 33333 | 100000 |
| Signal-BKG            | 0     | 31   | 57   | 148  | 351       | 942   | 2695  | 6369   |
| Log (Concentration)   |       | 2.14 | 2.61 | 3.09 | 3.57      | 4.05  | 4.52  | 5.00   |
| Log (Signal-BKG)      |       | 1.49 | 1.75 | 2.17 | 2.54      | 2.97  | 3.43  | 3.80   |
| Linear regression     | Slope |      |      |      | Intercept |       |       |        |
| log-log regression    | 0.07  |      |      |      | 0.00      |       |       |        |
|                       | 0.83  |      |      |      | -0.37     |       |       |        |
| <b>IL-31</b>          |       |      |      |      |           |       |       |        |
| Concentration (pg/ml) | 0     | 55   | 165  | 494  | 1481      | 4444  | 13333 | 40000  |
| Signal-BKG            | 0     | 169  | 341  | 909  | 2005      | 3821  | 6912  | 10338  |
| Log (Concentration)   |       | 1.74 | 2.22 | 2.69 | 3.17      | 3.65  | 4.12  | 4.60   |
| Log (Signal-BKG)      |       | 2.23 | 2.53 | 2.96 | 3.30      | 3.58  | 3.84  | 4.01   |
| Linear regression     | Slope |      |      |      | Intercept |       |       |        |
| log-log regression    | 0.56  |      |      |      | 0.00      |       |       |        |
|                       | 0.69  |      |      |      | 1.05      |       |       |        |
| <b>IP-10</b>          |       |      |      |      |           |       |       |        |
| Concentration (pg/ml) | 0     | 14   | 41   | 123  | 370       | 1111  | 3333  | 10000  |
| Signal-BKG            | 0     | 30   | 53   | 155  | 630       | 1342  | 3781  | 3389   |
| Log (Concentration)   |       | 1.14 | 1.61 | 2.09 | 2.57      | 3.05  | 3.52  | 4.00   |
| Log (Signal-BKG)      |       | 1.47 | 1.73 | 2.19 | 2.80      | 3.13  | 3.58  | 3.53   |
| Linear regression     | Slope |      |      |      | Intercept |       |       |        |
| log-log regression    | 1.15  |      |      |      | 0.00      |       |       |        |
|                       | 0.92  |      |      |      | 0.34      |       |       |        |
| <b>I-TAC</b>          |       |      |      |      |           |       |       |        |
| Concentration (pg/ml) | 0     | 14   | 41   | 123  | 370       | 1111  | 3333  | 10000  |
| Signal-BKG            | 0     | 87   | 314  | 594  | 1661      | 2286  | 5067  | 5781   |
| Log (Concentration)   |       | 1.14 | 1.61 | 2.09 | 2.57      | 3.05  | 3.52  | 4.00   |
| Log (Signal-BKG)      |       | 1.94 | 2.50 | 2.77 | 3.22      | 3.36  | 3.70  | 3.76   |
| Linear regression     | Slope |      |      |      | Intercept |       |       |        |
| log-log regression    | 1.61  |      |      |      | 0.00      |       |       |        |
|                       | 0.71  |      |      |      | 1.26      |       |       |        |
| <b>LIF</b>            |       |      |      |      |           |       |       |        |
| Concentration (pg/ml) | 0     | 18   | 53   | 160  | 481       | 1444  | 4333  | 13000  |
| Signal-BKG            | 0     | 31   | 161  | 408  | 1675      | 4007  | 11429 | 15604  |
| Log (Concentration)   |       | 1.25 | 1.73 | 2.21 | 2.68      | 3.16  | 3.64  | 4.11   |
| Log (Signal-BKG)      |       | 1.49 | 2.21 | 2.61 | 3.22      | 3.60  | 4.06  | 4.19   |
| Linear regression     | Slope |      |      |      | Intercept |       |       |        |
| log-log regression    | 2.66  |      |      |      | 0.00      |       |       |        |
|                       | 1.06  |      |      |      | 0.28      |       |       |        |
| <b>LIGHT</b>          |       |      |      |      |           |       |       |        |
| Concentration (pg/ml) | 0     | 14   | 41   | 123  | 370       | 1111  | 3333  | 10000  |
| Signal-BKG            | 0     | 15   | 85   | 159  | 781       | 1492  | 5169  | 8414   |
| Log (Concentration)   |       | 1.14 | 1.61 | 2.09 | 2.57      | 3.05  | 3.52  | 4.00   |
| Log (Signal-BKG)      |       | 1.17 | 1.93 | 2.20 | 2.89      | 3.17  | 3.71  | 3.92   |
| Linear regression     | Slope |      |      |      | Intercept |       |       |        |
| log-log regression    | 1.54  |      |      |      | 0.00      |       |       |        |
|                       | 1.03  |      |      |      | 0.12      |       |       |        |
| <b>Lymphotactin</b>   |       |      |      |      |           |       |       |        |
| Concentration (pg/ml) | 0     | 137  | 412  | 1235 | 3704      | 11111 | 33333 | 100000 |
| Signal-BKG            | 0     | 172  | 995  | 3912 | 9904      | 11992 | 15267 | 13017  |
| Log (Concentration)   |       | 2.14 | 2.61 | 3.09 | 3.57      | 4.05  | 4.52  | 5.00   |
| Log (Signal-BKG)      |       | 2.24 | 3.00 | 3.59 | 4.00      | 4.08  | 4.18  | 4.11   |
|                       | Slope |      |      |      | Intercept |       |       |        |

|                       |       |      |      |      |           |       |       |        |
|-----------------------|-------|------|------|------|-----------|-------|-------|--------|
| Linear regression     | 2.72  |      |      |      | 0.00      |       |       |        |
| log-log regression    | 1.23  |      |      |      | -0.31     |       |       |        |
| <b>MCP-2</b>          |       |      |      |      |           |       |       |        |
| Concentration (pg/ml) | 0     | 3    | 8    | 25   | 74        | 222   | 667   | 2000   |
| Signal-BKG            | 0     | 135  | 405  | 996  | 3307      | 5760  | 17241 | 15739  |
| Log (Concentration)   |       | 0.44 | 0.92 | 1.39 | 1.87      | 2.35  | 2.82  | 3.30   |
| Log (Signal-BKG)      |       | 2.13 | 2.61 | 3.00 | 3.52      | 3.76  | 4.24  | 4.20   |
| Linear regression     | Slope |      |      |      | Intercept |       |       |        |
| log-log regression    | 26.09 |      |      |      | 0.00      |       |       |        |
|                       | 0.87  |      |      |      | 1.79      |       |       |        |
| <b>MCP-3</b>          |       |      |      |      |           |       |       |        |
| Concentration (pg/ml) | 0     | 27   | 82   | 247  | 741       | 2222  | 6667  | 20000  |
| Signal-BKG            | 0     | 38   | 96   | 324  | 1299      | 2941  | 6524  | 7916   |
| Log (Concentration)   |       | 1.44 | 1.92 | 2.39 | 2.87      | 3.35  | 3.82  | 4.30   |
| Log (Signal-BKG)      |       | 1.58 | 1.98 | 2.51 | 3.11      | 3.47  | 3.81  | 3.90   |
| Linear regression     | Slope |      |      |      | Intercept |       |       |        |
| log-log regression    | 1.02  |      |      |      | 0.00      |       |       |        |
|                       | 0.97  |      |      |      | 0.18      |       |       |        |
| <b>MCP-4</b>          |       |      |      |      |           |       |       |        |
| Concentration (pg/ml) | 0     | 14   | 41   | 123  | 370       | 1111  | 3333  | 10000  |
| Signal-BKG            | 0     | 14   | 270  | 1495 | 3949      | 8373  | 9805  | 10858  |
| Log (Concentration)   |       | 1.14 | 1.61 | 2.09 | 2.57      | 3.05  | 3.52  | 4.00   |
| Log (Signal-BKG)      |       |      | 2.43 | 3.17 | 3.60      | 3.92  | 3.99  | 4.04   |
| Linear regression     | Slope |      |      |      | Intercept |       |       |        |
| log-log regression    | 7.89  |      |      |      | 0.00      |       |       |        |
|                       | 1.03  |      |      |      | 0.89      |       |       |        |
| <b>MDC</b>            |       |      |      |      |           |       |       |        |
| Concentration (pg/ml) | 0     | 14   | 41   | 123  | 370       | 1111  | 3333  | 10000  |
| Signal-BKG            | 0     | 68   | 262  | 661  | 2204      | 2972  | 7399  | 7927   |
| Log (Concentration)   |       | 1.14 | 1.61 | 2.09 | 2.57      | 3.05  | 3.52  | 4.00   |
| Log (Signal-BKG)      |       | 1.83 | 2.42 | 2.82 | 3.34      | 3.47  | 3.87  | 3.90   |
| Linear regression     | Slope |      |      |      | Intercept |       |       |        |
| log-log regression    | 2.31  |      |      |      | 0.00      |       |       |        |
|                       | 0.83  |      |      |      | 1.03      |       |       |        |
| <b>MIF</b>            |       |      |      |      |           |       |       |        |
| Concentration (pg/ml) | 0     | 137  | 412  | 1235 | 3704      | 11111 | 33333 | 100000 |
| Signal-BKG            | 0     | 28   | 38   | 105  | 268       | 574   | 2285  | 4591   |
| Log (Concentration)   |       | 2.14 | 2.61 | 3.09 | 3.57      | 4.05  | 4.52  | 5.00   |
| Log (Signal-BKG)      |       |      | 1.59 | 2.02 | 2.43      | 2.76  | 3.36  | 3.66   |
| Linear regression     | Slope |      |      |      | Intercept |       |       |        |
| log-log regression    | 0.05  |      |      |      | 0.00      |       |       |        |
|                       | 0.88  |      |      |      | -0.72     |       |       |        |
| <b>MIP-3a</b>         |       |      |      |      |           |       |       |        |
| Concentration (pg/ml) | 0     | 14   | 41   | 123  | 370       | 1111  | 3333  | 10000  |
| Signal-BKG            | 0     | 38   | 184  | 536  | 1710      | 3238  | 7919  | 11478  |
| Log (Concentration)   |       | 1.14 | 1.61 | 2.09 | 2.57      | 3.05  | 3.52  | 4.00   |
| Log (Signal-BKG)      |       |      | 2.27 | 2.73 | 3.23      | 3.51  | 3.90  | 4.06   |
| Linear regression     | Slope |      |      |      | Intercept |       |       |        |
| log-log regression    | 2.46  |      |      |      | 0.00      |       |       |        |
|                       | 0.85  |      |      |      | 0.95      |       |       |        |
| <b>MIP-3b</b>         |       |      |      |      |           |       |       |        |
| Concentration (pg/ml) | 0     | 27   | 82   | 247  | 741       | 2222  | 6667  | 20000  |
| Signal-BKG            | 0     | 14   | 147  | 345  | 1804      | 3980  | 13124 | 12557  |
| Log (Concentration)   |       | 1.44 | 1.92 | 2.39 | 2.87      | 3.35  | 3.82  | 4.30   |
| Log (Signal-BKG)      |       |      | 2.17 | 2.54 | 3.26      | 3.60  | 4.12  | 4.10   |
| Linear regression     | Slope |      |      |      | Intercept |       |       |        |
| log-log regression    | 1.96  |      |      |      | 0.00      |       |       |        |
|                       | 1.04  |      |      |      | 0.15      |       |       |        |
| <b>MPIF-1</b>         |       |      |      |      |           |       |       |        |
| Concentration (pg/ml) | 0     | 274  | 823  | 2469 | 7407      | 22222 | 66667 | 200000 |
| Signal-BKG            | 0     | 74   | 380  | 783  | 3394      | 7712  | 17950 | 18866  |
| Log (Concentration)   |       | 2.44 | 2.92 | 3.39 | 3.87      | 4.35  | 4.82  | 5.30   |
| Log (Signal-BKG)      |       | 1.87 | 2.58 | 2.89 | 3.53      | 3.89  | 4.25  | 4.28   |

|                       |       |      |           |      |      |       |       |        |
|-----------------------|-------|------|-----------|------|------|-------|-------|--------|
| Linear regression     | Slope |      | Intercept |      |      |       |       |        |
| log-log regression    | 0.28  |      |           |      |      |       |       |        |
|                       | 0.99  |      |           |      |      |       |       |        |
| <b>MSPa</b>           |       |      |           |      |      |       |       |        |
| Concentration (pg/ml) | 0     | 137  | 412       | 1235 | 3704 | 11111 | 33333 | 100000 |
| Signal-BKG            | 0     | 96   | 321       | 704  | 2312 | 4680  | 11463 | 18104  |
| Log (Concentration)   |       | 2.14 | 2.61      | 3.09 | 3.57 | 4.05  | 4.52  | 5.00   |
| Log (Signal-BKG)      |       | 1.98 | 2.51      | 2.85 | 3.36 | 3.67  | 4.06  | 4.26   |
| Linear regression     | Slope |      | Intercept |      |      |       |       |        |
| log-log regression    | 0.35  |      |           |      |      |       |       |        |
|                       | 0.86  |      |           |      |      |       |       |        |
| <b>NAP-2</b>          |       |      |           |      |      |       |       |        |
| Concentration (pg/ml) | 0     | 27   | 82        | 247  | 741  | 2222  | 6667  | 20000  |
| Signal-BKG            | 0     | 22   | 54        | 102  | 339  | 687   | 1802  | 4196   |
| Log (Concentration)   |       | 1.44 | 1.92      | 2.39 | 2.87 | 3.35  | 3.82  | 4.30   |
| Log (Signal-BKG)      |       | 1.35 | 1.73      | 2.01 | 2.53 | 2.84  | 3.26  | 3.62   |
| Linear regression     | Slope |      | Intercept |      |      |       |       |        |
| log-log regression    | 0.22  |      |           |      |      |       |       |        |
|                       | 0.80  |      |           |      |      |       |       |        |
| <b>OPN</b>            |       |      |           |      |      |       |       |        |
| Concentration (pg/ml) | 0     | 137  | 412       | 1235 | 3704 | 11111 | 33333 | 100000 |
| Signal-BKG            | 0     | 30   | 91        | 233  | 711  | 1768  | 3868  | 5666   |
| Log (Concentration)   |       | 2.14 | 2.61      | 3.09 | 3.57 | 4.05  | 4.52  | 5.00   |
| Log (Signal-BKG)      |       | 1.48 | 1.96      | 2.37 | 2.85 | 3.25  | 3.59  | 3.75   |
| Linear regression     | Slope |      | Intercept |      |      |       |       |        |
| log-log regression    | 0.12  |      |           |      |      |       |       |        |
|                       | 0.89  |      |           |      |      |       |       |        |
| <b>PARC</b>           |       |      |           |      |      |       |       |        |
| Concentration (pg/ml) | 0     | 14   | 41        | 123  | 370  | 1111  | 3333  | 10000  |
| Signal-BKG            | 0     | 9    | 35        | 71   | 341  | 576   | 1865  | 2729   |
| Log (Concentration)   |       | 1.14 | 1.61      | 2.09 | 2.57 | 3.05  | 3.52  | 4.00   |
| Log (Signal-BKG)      |       | 0.98 | 1.55      | 1.85 | 2.53 | 2.76  | 3.27  | 3.44   |
| Linear regression     | Slope |      | Intercept |      |      |       |       |        |
| log-log regression    | 0.30  |      |           |      |      |       |       |        |
|                       | 0.88  |      |           |      |      |       |       |        |
| <b>PF4</b>            |       |      |           |      |      |       |       |        |
| Concentration (pg/ml) | 0     | 137  | 412       | 1235 | 3704 | 11111 | 33333 | 100000 |
| Signal-BKG            | 0     | 208  | 530       | 902  | 1642 | 1940  | 2195  | 2138   |
| Log (Concentration)   |       | 2.14 | 2.61      | 3.09 | 3.57 | 4.05  | 4.52  | 5.00   |
| Log (Signal-BKG)      |       | 2.32 | 2.72      | 2.96 | 3.22 | 3.29  | 3.34  | 3.33   |
| Linear regression     | Slope |      | Intercept |      |      |       |       |        |
| log-log regression    | 0.48  |      |           |      |      |       |       |        |
|                       | 0.61  |      |           |      |      |       |       |        |
| <b>SDF-1a</b>         |       |      |           |      |      |       |       |        |
| Concentration (pg/ml) | 0     | 137  | 412       | 1235 | 3704 | 11111 | 33333 | 100000 |
| Signal-BKG            | 0     | 13   | 28        | 48   | 161  | 378   | 962   | 1403   |
| Log (Concentration)   |       | 2.14 | 2.61      | 3.09 | 3.57 | 4.05  | 4.52  | 5.00   |
| Log (Signal-BKG)      |       | 1.11 | 1.45      | 1.69 | 2.21 | 2.58  | 2.98  | 3.15   |
| Linear regression     | Slope |      | Intercept |      |      |       |       |        |
| log-log regression    | 0.03  |      |           |      |      |       |       |        |
|                       | 0.79  |      |           |      |      |       |       |        |
| <b>TARC</b>           |       |      |           |      |      |       |       |        |
| Concentration (pg/ml) | 0     | 14   | 41        | 123  | 370  | 1111  | 3333  | 10000  |
| Signal-BKG            | 0     | 135  | 568       | 976  | 2729 | 3126  | 4681  | 4130   |
| Log (Concentration)   |       | 1.14 | 1.61      | 2.09 | 2.57 | 3.05  | 3.52  | 4.00   |
| Log (Signal-BKG)      |       | 2.13 | 2.75      | 2.99 | 3.44 | 3.49  | 3.67  | 3.62   |
| Linear regression     | Slope |      | Intercept |      |      |       |       |        |
| log-log regression    | 7.50  |      |           |      |      |       |       |        |
|                       | 0.87  |      |           |      |      |       |       |        |
| <b>TECK</b>           |       |      |           |      |      |       |       |        |
| Concentration (pg/ml) | 0     | 137  | 412       | 1235 | 3704 | 11111 | 33333 | 100000 |
| Signal-BKG            | 0     | 15   | 59        | 170  | 777  | 1771  | 7196  | 9532   |
| Log (Concentration)   |       | 2.14 | 2.61      | 3.09 | 3.57 | 4.05  | 4.52  | 5.00   |



|                              |          |             |             |             |             |              |              |              |
|------------------------------|----------|-------------|-------------|-------------|-------------|--------------|--------------|--------------|
| <b>Log (Signal-BKG)</b>      |          | <b>1.19</b> | <b>1.77</b> | <b>2.23</b> | <b>2.89</b> | <b>3.25</b>  | <b>3.86</b>  | <b>3.98</b>  |
| Linear regression            | Slope    |             |             |             |             |              | Intercept    |              |
| log-log regression           | 0.21     |             |             |             |             |              | 0.00         |              |
|                              | 1.10     |             |             |             |             |              | -1.14        |              |
| <b>TSLP</b>                  |          |             |             |             |             |              |              |              |
| <b>Concentration (pg/ml)</b> | <b>0</b> | <b>55</b>   | <b>165</b>  | <b>494</b>  | <b>1481</b> | <b>4444</b>  | <b>13333</b> | <b>40000</b> |
| <b>Signal-BKG</b>            | <b>0</b> | <b>30</b>   | <b>146</b>  | <b>332</b>  | <b>967</b>  | <b>1211</b>  | <b>2027</b>  | <b>2027</b>  |
| <b>Log (Concentration)</b>   |          | <b>1.74</b> | <b>2.22</b> | <b>2.69</b> | <b>3.17</b> | <b>3.65</b>  | <b>4.12</b>  | <b>4.60</b>  |
| <b>Log (Signal-BKG)</b>      |          | <b>1.48</b> | <b>2.16</b> | <b>2.52</b> | <b>2.99</b> | <b>3.08</b>  | <b>3.31</b>  | <b>3.31</b>  |
| Linear regression            | Slope    |             |             |             |             |              | Intercept    |              |
| log-log regression           | 0.66     |             |             |             |             |              | 0.00         |              |
|                              | 1.02     |             |             |             |             |              | -0.22        |              |
| <b>4-1BB</b>                 |          |             |             |             |             |              |              |              |
| <b>Concentration (pg/ml)</b> | <b>0</b> | <b>14</b>   | <b>41</b>   | <b>123</b>  | <b>370</b>  | <b>1111</b>  | <b>3333</b>  | <b>10000</b> |
| <b>Signal-BKG</b>            | <b>0</b> | <b>71</b>   | <b>177</b>  | <b>495</b>  | <b>1062</b> | <b>2914</b>  | <b>5570</b>  | <b>6376</b>  |
| <b>Log (Concentration)</b>   |          | <b>1.14</b> | <b>1.61</b> | <b>2.09</b> | <b>2.57</b> | <b>3.05</b>  | <b>3.52</b>  | <b>4.00</b>  |
| <b>Log (Signal-BKG)</b>      |          | <b>1.85</b> | <b>2.25</b> | <b>2.69</b> | <b>3.03</b> | <b>3.46</b>  | <b>3.75</b>  | <b>3.80</b>  |
| Linear regression            | Slope    |             |             |             |             |              | Intercept    |              |
| log-log regression           | 1.78     |             |             |             |             |              | 0.00         |              |
|                              | 0.81     |             |             |             |             |              | 0.96         |              |
| <b>ALCAM</b>                 |          |             |             |             |             |              |              |              |
| <b>Concentration (pg/ml)</b> | <b>0</b> | <b>14</b>   | <b>41</b>   | <b>123</b>  | <b>370</b>  | <b>1111</b>  | <b>3333</b>  | <b>10000</b> |
| <b>Signal-BKG</b>            | <b>0</b> | <b>47</b>   | <b>133</b>  | <b>389</b>  | <b>839</b>  | <b>2329</b>  | <b>5692</b>  | <b>11551</b> |
| <b>Log (Concentration)</b>   |          | <b>1.14</b> | <b>1.61</b> | <b>2.09</b> | <b>2.57</b> | <b>3.05</b>  | <b>3.52</b>  | <b>4.00</b>  |
| <b>Log (Signal-BKG)</b>      |          | <b>1.67</b> | <b>2.12</b> | <b>2.59</b> | <b>2.92</b> | <b>3.37</b>  | <b>3.76</b>  | <b>4.06</b>  |
| Linear regression            | Slope    |             |             |             |             |              | Intercept    |              |
| log-log regression           | 1.22     |             |             |             |             |              | 0.00         |              |
|                              | 0.84     |             |             |             |             |              | 0.77         |              |
| <b>B7-1</b>                  |          |             |             |             |             |              |              |              |
| <b>Concentration (pg/ml)</b> | <b>0</b> | <b>14</b>   | <b>41</b>   | <b>123</b>  | <b>370</b>  | <b>1111</b>  | <b>3333</b>  | <b>10000</b> |
| <b>Signal-BKG</b>            | <b>0</b> | <b>73</b>   | <b>203</b>  | <b>526</b>  | <b>1311</b> | <b>3934</b>  | <b>11354</b> | <b>22579</b> |
| <b>Log (Concentration)</b>   |          | <b>1.14</b> | <b>1.61</b> | <b>2.09</b> | <b>2.57</b> | <b>3.05</b>  | <b>3.52</b>  | <b>4.00</b>  |
| <b>Log (Signal-BKG)</b>      |          | <b>1.87</b> | <b>2.31</b> | <b>2.72</b> | <b>3.12</b> | <b>3.59</b>  | <b>4.06</b>  | <b>4.35</b>  |
| Linear regression            | Slope    |             |             |             |             |              | Intercept    |              |
| log-log regression           | 2.39     |             |             |             |             |              | 0.00         |              |
|                              | 0.89     |             |             |             |             |              | 0.87         |              |
| <b>BCMA</b>                  |          |             |             |             |             |              |              |              |
| <b>Concentration (pg/ml)</b> | <b>0</b> | <b>27</b>   | <b>82</b>   | <b>247</b>  | <b>741</b>  | <b>2222</b>  | <b>6667</b>  | <b>20000</b> |
| <b>Signal-BKG</b>            | <b>0</b> | <b>27</b>   | <b>71</b>   | <b>186</b>  | <b>434</b>  | <b>1864</b>  | <b>5514</b>  | <b>9963</b>  |
| <b>Log (Concentration)</b>   |          | <b>1.44</b> | <b>1.92</b> | <b>2.39</b> | <b>2.87</b> | <b>3.35</b>  | <b>3.82</b>  | <b>4.30</b>  |
| <b>Log (Signal-BKG)</b>      |          | <b>1.44</b> | <b>1.85</b> | <b>2.27</b> | <b>2.64</b> | <b>3.27</b>  | <b>3.74</b>  | <b>4.00</b>  |
| Linear regression            | Slope    |             |             |             |             |              | Intercept    |              |
| log-log regression           | 0.83     |             |             |             |             |              | 0.00         |              |
|                              | 0.97     |             |             |             |             |              | -0.01        |              |
| <b>CD14</b>                  |          |             |             |             |             |              |              |              |
| <b>Concentration (pg/ml)</b> | <b>0</b> | <b>14</b>   | <b>41</b>   | <b>123</b>  | <b>370</b>  | <b>1111</b>  | <b>3333</b>  | <b>10000</b> |
| <b>Signal-BKG</b>            | <b>0</b> | <b>64</b>   | <b>96</b>   | <b>407</b>  | <b>866</b>  | <b>2630</b>  | <b>4422</b>  | <b>7117</b>  |
| <b>Log (Concentration)</b>   |          | <b>1.14</b> | <b>1.61</b> | <b>2.09</b> | <b>2.57</b> | <b>3.05</b>  | <b>3.52</b>  | <b>4.00</b>  |
| <b>Log (Signal-BKG)</b>      |          | <b>1.81</b> | <b>1.98</b> | <b>2.61</b> | <b>2.94</b> | <b>3.42</b>  | <b>3.65</b>  | <b>3.85</b>  |
| Linear regression            | Slope    |             |             |             |             |              | Intercept    |              |
| log-log regression           | 0.79     |             |             |             |             |              | 0.00         |              |
|                              | 0.77     |             |             |             |             |              | 0.92         |              |
| <b>CD30</b>                  |          |             |             |             |             |              |              |              |
| <b>Concentration (pg/ml)</b> | <b>0</b> | <b>14</b>   | <b>41</b>   | <b>123</b>  | <b>370</b>  | <b>1111</b>  | <b>3333</b>  | <b>10000</b> |
| <b>Signal-BKG</b>            | <b>0</b> | <b>58</b>   | <b>136</b>  | <b>296</b>  | <b>652</b>  | <b>1947</b>  | <b>5705</b>  | <b>11437</b> |
| <b>Log (Concentration)</b>   |          | <b>1.14</b> | <b>1.61</b> | <b>2.09</b> | <b>2.57</b> | <b>3.05</b>  | <b>3.52</b>  | <b>4.00</b>  |
| <b>Log (Signal-BKG)</b>      |          | <b>1.76</b> | <b>2.13</b> | <b>2.47</b> | <b>2.81</b> | <b>3.29</b>  | <b>3.76</b>  | <b>4.06</b>  |
| Linear regression            | Slope    |             |             |             |             |              | Intercept    |              |
| log-log regression           | 1.21     |             |             |             |             |              | 0.00         |              |
|                              | 0.82     |             |             |             |             |              | 0.79         |              |
| <b>CD40 L</b>                |          |             |             |             |             |              |              |              |
| <b>Concentration (pg/ml)</b> | <b>0</b> | <b>14</b>   | <b>41</b>   | <b>123</b>  | <b>370</b>  | <b>1111</b>  | <b>3333</b>  | <b>10000</b> |
| <b>Signal-BKG</b>            | <b>0</b> | <b>361</b>  | <b>870</b>  | <b>2093</b> | <b>5321</b> | <b>12439</b> | <b>26530</b> | <b>42506</b> |

|                              |          |             |             |             |             |             |              |              |
|------------------------------|----------|-------------|-------------|-------------|-------------|-------------|--------------|--------------|
| <b>Log (Concentration)</b>   |          | <b>1.14</b> | <b>1.61</b> | <b>2.09</b> | <b>2.57</b> | <b>3.05</b> | <b>3.52</b>  | <b>4.00</b>  |
| <b>Log (Signal-BKG)</b>      |          | <b>2.56</b> | <b>2.94</b> | <b>3.32</b> | <b>3.73</b> | <b>4.09</b> | <b>4.42</b>  | <b>4.63</b>  |
| Linear regression            | Slope    |             |             |             |             | Intercept   |              |              |
| log-log regression           | 8.36     |             |             |             |             | 0.00        |              |              |
|                              | 0.79     |             |             |             |             | 1.67        |              |              |
| <b>CEACAM-1</b>              |          |             |             |             |             |             |              |              |
| <b>Concentration (pg/ml)</b> | <b>0</b> | <b>14</b>   | <b>41</b>   | <b>123</b>  | <b>370</b>  | <b>1111</b> | <b>3333</b>  | <b>10000</b> |
| <b>Signal-BKG</b>            | <b>0</b> | <b>27</b>   | <b>60</b>   | <b>179</b>  | <b>376</b>  | <b>1247</b> | <b>3431</b>  | <b>9334</b>  |
| <b>Log (Concentration)</b>   |          | <b>1.14</b> | <b>1.61</b> | <b>2.09</b> | <b>2.57</b> | <b>3.05</b> | <b>3.52</b>  | <b>4.00</b>  |
| <b>Log (Signal-BKG)</b>      |          | <b>1.42</b> | <b>1.78</b> | <b>2.25</b> | <b>2.57</b> | <b>3.10</b> | <b>3.54</b>  | <b>3.97</b>  |
| Linear regression            | Slope    |             |             |             |             | Intercept   |              |              |
| log-log regression           | 0.95     |             |             |             |             | 0.00        |              |              |
|                              | 0.90     |             |             |             |             | 0.36        |              |              |
| <b>DR6</b>                   |          |             |             |             |             |             |              |              |
| <b>Concentration (pg/ml)</b> | <b>0</b> | <b>5</b>    | <b>16</b>   | <b>49</b>   | <b>148</b>  | <b>444</b>  | <b>1333</b>  | <b>4000</b>  |
| <b>Signal-BKG</b>            | <b>0</b> | <b>20</b>   | <b>81</b>   | <b>219</b>  | <b>480</b>  | <b>1601</b> | <b>4063</b>  | <b>15241</b> |
| <b>Log (Concentration)</b>   |          | <b>0.74</b> | <b>1.22</b> | <b>1.69</b> | <b>2.17</b> | <b>2.65</b> | <b>3.12</b>  | <b>3.60</b>  |
| <b>Log (Signal-BKG)</b>      |          | <b>1.31</b> | <b>1.91</b> | <b>2.34</b> | <b>2.68</b> | <b>3.20</b> | <b>3.61</b>  | <b>4.18</b>  |
| Linear regression            | Slope    |             |             |             |             | Intercept   |              |              |
| log-log regression           | 3.73     |             |             |             |             | 0.00        |              |              |
|                              | 0.97     |             |             |             |             | 0.65        |              |              |
| <b>Dtk</b>                   |          |             |             |             |             |             |              |              |
| <b>Concentration (pg/ml)</b> | <b>0</b> | <b>27</b>   | <b>82</b>   | <b>247</b>  | <b>741</b>  | <b>2222</b> | <b>6667</b>  | <b>20000</b> |
| <b>Signal-BKG</b>            | <b>0</b> | <b>20</b>   | <b>73</b>   | <b>272</b>  | <b>552</b>  | <b>1454</b> | <b>3897</b>  | <b>7647</b>  |
| <b>Log (Concentration)</b>   |          | <b>1.44</b> | <b>1.92</b> | <b>2.39</b> | <b>2.87</b> | <b>3.35</b> | <b>3.82</b>  | <b>4.30</b>  |
| <b>Log (Signal-BKG)</b>      |          | <b>1.30</b> | <b>1.86</b> | <b>2.44</b> | <b>2.74</b> | <b>3.16</b> | <b>3.59</b>  | <b>3.88</b>  |
| Linear regression            | Slope    |             |             |             |             | Intercept   |              |              |
| log-log regression           | 0.41     |             |             |             |             | 0.00        |              |              |
|                              | 0.89     |             |             |             |             | 0.15        |              |              |
| <b>Endoglin</b>              |          |             |             |             |             |             |              |              |
| <b>Concentration (pg/ml)</b> | <b>0</b> | <b>5</b>    | <b>16</b>   | <b>49</b>   | <b>148</b>  | <b>444</b>  | <b>1333</b>  | <b>4000</b>  |
| <b>Signal-BKG</b>            | <b>0</b> | <b>76</b>   | <b>141</b>  | <b>367</b>  | <b>882</b>  | <b>2196</b> | <b>5640</b>  | <b>10094</b> |
| <b>Log (Concentration)</b>   |          | <b>0.74</b> | <b>1.22</b> | <b>1.69</b> | <b>2.17</b> | <b>2.65</b> | <b>3.12</b>  | <b>3.60</b>  |
| <b>Log (Signal-BKG)</b>      |          | <b>1.88</b> | <b>2.15</b> | <b>2.56</b> | <b>2.95</b> | <b>3.34</b> | <b>3.75</b>  | <b>4.00</b>  |
| Linear regression            | Slope    |             |             |             |             | Intercept   |              |              |
| log-log regression           | 2.72     |             |             |             |             | 0.00        |              |              |
|                              | 0.77     |             |             |             |             | 1.27        |              |              |
| <b>ErbB3</b>                 |          |             |             |             |             |             |              |              |
| <b>Concentration (pg/ml)</b> | <b>0</b> | <b>27</b>   | <b>82</b>   | <b>247</b>  | <b>741</b>  | <b>2222</b> | <b>6667</b>  | <b>20000</b> |
| <b>Signal-BKG</b>            | <b>0</b> | <b>85</b>   | <b>141</b>  | <b>340</b>  | <b>711</b>  | <b>1977</b> | <b>5692</b>  | <b>13758</b> |
| <b>Log (Concentration)</b>   |          | <b>1.44</b> | <b>1.92</b> | <b>2.39</b> | <b>2.87</b> | <b>3.35</b> | <b>3.82</b>  | <b>4.30</b>  |
| <b>Log (Signal-BKG)</b>      |          | <b>1.93</b> | <b>2.15</b> | <b>2.53</b> | <b>2.85</b> | <b>3.30</b> | <b>3.76</b>  | <b>4.14</b>  |
| Linear regression            | Slope    |             |             |             |             | Intercept   |              |              |
| log-log regression           | 0.71     |             |             |             |             | 0.00        |              |              |
|                              | 0.79     |             |             |             |             | 0.67        |              |              |
| <b>E-Selectin</b>            |          |             |             |             |             |             |              |              |
| <b>Concentration (pg/ml)</b> | <b>0</b> | <b>55</b>   | <b>165</b>  | <b>494</b>  | <b>1481</b> | <b>4444</b> | <b>13333</b> | <b>40000</b> |
| <b>Signal-BKG</b>            | <b>0</b> | <b>14</b>   | <b>35</b>   | <b>81</b>   | <b>185</b>  | <b>656</b>  | <b>2579</b>  | <b>6778</b>  |
| <b>Log (Concentration)</b>   |          | <b>1.74</b> | <b>2.22</b> | <b>2.69</b> | <b>3.17</b> | <b>3.65</b> | <b>4.12</b>  | <b>4.60</b>  |
| <b>Log (Signal-BKG)</b>      |          | <b>1.14</b> | <b>1.55</b> | <b>1.91</b> | <b>2.27</b> | <b>2.82</b> | <b>3.41</b>  | <b>3.83</b>  |
| Linear regression            | Slope    |             |             |             |             | Intercept   |              |              |
| log-log regression           | 0.17     |             |             |             |             | 0.00        |              |              |
|                              | 0.95     |             |             |             |             | -0.60       |              |              |
| <b>Fas</b>                   |          |             |             |             |             |             |              |              |
| <b>Concentration (pg/ml)</b> | <b>0</b> | <b>3</b>    | <b>8</b>    | <b>25</b>   | <b>74</b>   | <b>222</b>  | <b>667</b>   | <b>2000</b>  |
| <b>Signal-BKG</b>            | <b>0</b> | <b>37</b>   | <b>61</b>   | <b>129</b>  | <b>309</b>  | <b>699</b>  | <b>2001</b>  | <b>3370</b>  |
| <b>Log (Concentration)</b>   |          | <b>0.44</b> | <b>0.92</b> | <b>1.39</b> | <b>1.87</b> | <b>2.35</b> | <b>2.82</b>  | <b>3.30</b>  |
| <b>Log (Signal-BKG)</b>      |          | <b>1.56</b> | <b>1.78</b> | <b>2.11</b> | <b>2.49</b> | <b>2.84</b> | <b>3.30</b>  | <b>3.53</b>  |
| Linear regression            | Slope    |             |             |             |             | Intercept   |              |              |
| log-log regression           | 1.83     |             |             |             |             | 0.00        |              |              |
|                              | 0.72     |             |             |             |             | 1.16        |              |              |
| <b>Flt-3L</b>                |          |             |             |             |             |             |              |              |
| <b>Concentration (pg/ml)</b> | <b>0</b> | <b>3</b>    | <b>8</b>    | <b>25</b>   | <b>74</b>   | <b>222</b>  | <b>667</b>   | <b>2000</b>  |

|                              |          |             |             |             |             |              |              |               |
|------------------------------|----------|-------------|-------------|-------------|-------------|--------------|--------------|---------------|
| <b>Signal-BKG</b>            | <b>0</b> | <b>98</b>   | <b>259</b>  | <b>673</b>  | <b>1812</b> | <b>5268</b>  | <b>14444</b> | <b>23669</b>  |
| <b>Log (Concentration)</b>   |          | <b>0.44</b> | <b>0.92</b> | <b>1.39</b> | <b>1.87</b> | <b>2.35</b>  | <b>2.82</b>  | <b>3.30</b>   |
| <b>Log (Signal-BKG)</b>      |          | <b>1.99</b> | <b>2.41</b> | <b>2.83</b> | <b>3.26</b> | <b>3.72</b>  | <b>4.16</b>  | <b>4.37</b>   |
| Linear regression            | Slope    |             |             |             |             | Intercept    |              |               |
| log-log regression           | 12.95    |             |             |             |             | 0.00         |              |               |
|                              | 0.86     |             |             |             |             | 1.64         |              |               |
| <b>G1TR</b>                  |          |             |             |             |             |              |              |               |
| <b>Concentration (pg/ml)</b> | <b>0</b> | <b>14</b>   | <b>41</b>   | <b>123</b>  | <b>370</b>  | <b>1111</b>  | <b>3333</b>  | <b>10000</b>  |
| <b>Signal-BKG</b>            | <b>0</b> | <b>50</b>   | <b>103</b>  | <b>213</b>  | <b>483</b>  | <b>1308</b>  | <b>3687</b>  | <b>7454</b>   |
| <b>Log (Concentration)</b>   |          | <b>1.14</b> | <b>1.61</b> | <b>2.09</b> | <b>2.57</b> | <b>3.05</b>  | <b>3.52</b>  | <b>4.00</b>   |
| <b>Log (Signal-BKG)</b>      |          | <b>1.70</b> | <b>2.01</b> | <b>2.33</b> | <b>2.68</b> | <b>3.12</b>  | <b>3.57</b>  | <b>3.87</b>   |
| Linear regression            | Slope    |             |             |             |             | Intercept    |              |               |
| log-log regression           | 0.79     |             |             |             |             | 0.00         |              |               |
|                              | 0.78     |             |             |             |             | 0.75         |              |               |
| <b>HVEM</b>                  |          |             |             |             |             |              |              |               |
| <b>Concentration (pg/ml)</b> | <b>0</b> | <b>55</b>   | <b>165</b>  | <b>494</b>  | <b>1481</b> | <b>4444</b>  | <b>13333</b> | <b>40000</b>  |
| <b>Signal-BKG</b>            | <b>0</b> | <b>166</b>  | <b>385</b>  | <b>1052</b> | <b>2025</b> | <b>4745</b>  | <b>11629</b> | <b>18139</b>  |
| <b>Log (Concentration)</b>   |          | <b>1.74</b> | <b>2.22</b> | <b>2.69</b> | <b>3.17</b> | <b>3.65</b>  | <b>4.12</b>  | <b>4.60</b>   |
| <b>Log (Signal-BKG)</b>      |          | <b>2.22</b> | <b>2.59</b> | <b>3.02</b> | <b>3.31</b> | <b>3.68</b>  | <b>4.07</b>  | <b>4.26</b>   |
| Linear regression            | Slope    |             |             |             |             | Intercept    |              |               |
| log-log regression           | 0.50     |             |             |             |             | 0.00         |              |               |
|                              | 0.73     |             |             |             |             | 0.99         |              |               |
| <b>ICAM-3</b>                |          |             |             |             |             |              |              |               |
| <b>Concentration (pg/ml)</b> | <b>0</b> | <b>137</b>  | <b>412</b>  | <b>1235</b> | <b>3704</b> | <b>11111</b> | <b>33333</b> | <b>100000</b> |
| <b>Signal-BKG</b>            | <b>0</b> | <b>42</b>   | <b>82</b>   | <b>280</b>  | <b>499</b>  | <b>1080</b>  | <b>1997</b>  | <b>2308</b>   |
| <b>Log (Concentration)</b>   |          | <b>2.14</b> | <b>2.61</b> | <b>3.09</b> | <b>3.57</b> | <b>4.05</b>  | <b>4.52</b>  | <b>5.00</b>   |
| <b>Log (Signal-BKG)</b>      |          | <b>1.62</b> | <b>1.92</b> | <b>2.45</b> | <b>2.70</b> | <b>3.03</b>  | <b>3.30</b>  | <b>3.36</b>   |
| Linear regression            | Slope    |             |             |             |             | Intercept    |              |               |
| log-log regression           | 0.06     |             |             |             |             | 0.00         |              |               |
|                              | 0.72     |             |             |             |             | 0.11         |              |               |
| <b>IL-1 R4</b>               |          |             |             |             |             |              |              |               |
| <b>Concentration (pg/ml)</b> | <b>0</b> | <b>5</b>    | <b>16</b>   | <b>49</b>   | <b>148</b>  | <b>444</b>   | <b>1333</b>  | <b>4000</b>   |
| <b>Signal-BKG</b>            | <b>0</b> | <b>21</b>   | <b>30</b>   | <b>113</b>  | <b>245</b>  | <b>655</b>   | <b>1690</b>  | <b>4228</b>   |
| <b>Log (Concentration)</b>   |          | <b>0.74</b> | <b>1.22</b> | <b>1.69</b> | <b>2.17</b> | <b>2.65</b>  | <b>3.12</b>  | <b>3.60</b>   |
| <b>Log (Signal-BKG)</b>      |          | <b>1.32</b> | <b>1.48</b> | <b>2.05</b> | <b>2.39</b> | <b>2.82</b>  | <b>3.23</b>  | <b>3.63</b>   |
| Linear regression            | Slope    |             |             |             |             | Intercept    |              |               |
| log-log regression           | 1.08     |             |             |             |             | 0.00         |              |               |
|                              | 0.84     |             |             |             |             | 0.60         |              |               |
| <b>IL-1 RI</b>               |          |             |             |             |             |              |              |               |
| <b>Concentration (pg/ml)</b> | <b>0</b> | <b>5</b>    | <b>16</b>   | <b>49</b>   | <b>148</b>  | <b>444</b>   | <b>1333</b>  | <b>4000</b>   |
| <b>Signal-BKG</b>            | <b>0</b> | <b>33</b>   | <b>104</b>  | <b>227</b>  | <b>505</b>  | <b>1431</b>  | <b>3661</b>  | <b>4736</b>   |
| <b>Log (Concentration)</b>   |          | <b>0.74</b> | <b>1.22</b> | <b>1.69</b> | <b>2.17</b> | <b>2.65</b>  | <b>3.12</b>  | <b>3.60</b>   |
| <b>Log (Signal-BKG)</b>      |          | <b>1.52</b> | <b>2.02</b> | <b>2.36</b> | <b>2.70</b> | <b>3.16</b>  | <b>3.56</b>  | <b>3.68</b>   |
| Linear regression            | Slope    |             |             |             |             | Intercept    |              |               |
| log-log regression           | 2.80     |             |             |             |             | 0.00         |              |               |
|                              | 0.84     |             |             |             |             | 0.93         |              |               |
| <b>IL-2 Rg</b>               |          |             |             |             |             |              |              |               |
| <b>Concentration (pg/ml)</b> | <b>0</b> | <b>14</b>   | <b>41</b>   | <b>123</b>  | <b>370</b>  | <b>1111</b>  | <b>3333</b>  | <b>10000</b>  |
| <b>Signal-BKG</b>            | <b>0</b> | <b>16</b>   | <b>61</b>   | <b>171</b>  | <b>363</b>  | <b>1015</b>  | <b>2285</b>  | <b>4283</b>   |
| <b>Log (Concentration)</b>   |          | <b>1.14</b> | <b>1.61</b> | <b>2.09</b> | <b>2.57</b> | <b>3.05</b>  | <b>3.52</b>  | <b>4.00</b>   |
| <b>Log (Signal-BKG)</b>      |          | <b>1.21</b> | <b>1.78</b> | <b>2.23</b> | <b>2.56</b> | <b>3.01</b>  | <b>3.36</b>  | <b>3.63</b>   |
| Linear regression            | Slope    |             |             |             |             | Intercept    |              |               |
| log-log regression           | 0.46     |             |             |             |             | 0.00         |              |               |
|                              | 0.84     |             |             |             |             | 0.39         |              |               |
| <b>IL-10 Rb</b>              |          |             |             |             |             |              |              |               |
| <b>Concentration (pg/ml)</b> | <b>0</b> | <b>5</b>    | <b>16</b>   | <b>49</b>   | <b>148</b>  | <b>444</b>   | <b>1333</b>  | <b>4000</b>   |
| <b>Signal-BKG</b>            | <b>0</b> | <b>45</b>   | <b>108</b>  | <b>251</b>  | <b>575</b>  | <b>1544</b>  | <b>4927</b>  | <b>11230</b>  |
| <b>Log (Concentration)</b>   |          | <b>0.74</b> | <b>1.22</b> | <b>1.69</b> | <b>2.17</b> | <b>2.65</b>  | <b>3.12</b>  | <b>3.60</b>   |
| <b>Log (Signal-BKG)</b>      |          | <b>1.65</b> | <b>2.03</b> | <b>2.40</b> | <b>2.76</b> | <b>3.19</b>  | <b>3.69</b>  | <b>4.05</b>   |
| Linear regression            | Slope    |             |             |             |             | Intercept    |              |               |
| log-log regression           | 2.90     |             |             |             |             | 0.00         |              |               |
|                              | 0.85     |             |             |             |             | 0.99         |              |               |
| <b>IL-17R</b>                |          |             |             |             |             |              |              |               |

|                              |          |             |             |             |             |              |              |               |
|------------------------------|----------|-------------|-------------|-------------|-------------|--------------|--------------|---------------|
| <b>Concentration (pg/ml)</b> | <b>0</b> | <b>14</b>   | <b>41</b>   | <b>123</b>  | <b>370</b>  | <b>1111</b>  | <b>3333</b>  | <b>10000</b>  |
| <b>Signal-BKG</b>            | <b>0</b> | <b>48</b>   | <b>139</b>  | <b>335</b>  | <b>696</b>  | <b>2098</b>  | <b>5123</b>  | <b>8395</b>   |
| <b>Log (Concentration)</b>   |          | <b>1.14</b> | <b>1.61</b> | <b>2.09</b> | <b>2.57</b> | <b>3.05</b>  | <b>3.52</b>  | <b>4.00</b>   |
| <b>Log (Signal-BKG)</b>      |          | <b>1.68</b> | <b>2.14</b> | <b>2.53</b> | <b>2.84</b> | <b>3.32</b>  | <b>3.71</b>  | <b>3.92</b>   |
| Linear regression            | Slope    |             |             |             | Intercept   |              |              |               |
| log-log regression           | 1.58     |             |             |             | 0.00        |              |              |               |
|                              | 0.84     |             |             |             | 0.75        |              |              |               |
| <b>IL-21R</b>                |          |             |             |             |             |              |              |               |
| <b>Concentration (pg/ml)</b> | <b>0</b> | <b>27</b>   | <b>82</b>   | <b>247</b>  | <b>741</b>  | <b>2222</b>  | <b>6667</b>  | <b>20000</b>  |
| <b>Signal-BKG</b>            | <b>0</b> | <b>13</b>   | <b>24</b>   | <b>67</b>   | <b>79</b>   | <b>261</b>   | <b>783</b>   | <b>1955</b>   |
| <b>Log (Concentration)</b>   |          | <b>1.44</b> | <b>1.92</b> | <b>2.39</b> | <b>2.87</b> | <b>3.35</b>  | <b>3.82</b>  | <b>4.30</b>   |
| <b>Log (Signal-BKG)</b>      |          | <b>1.11</b> | <b>1.38</b> | <b>1.83</b> | <b>1.90</b> | <b>2.42</b>  | <b>2.89</b>  | <b>3.29</b>   |
| Linear regression            | Slope    |             |             |             | Intercept   |              |              |               |
| log-log regression           | 0.10     |             |             |             | 0.00        |              |              |               |
|                              | 0.76     |             |             |             | -0.06       |              |              |               |
| <b>LIMPII</b>                |          |             |             |             |             |              |              |               |
| <b>Concentration (pg/ml)</b> | <b>0</b> | <b>5</b>    | <b>16</b>   | <b>49</b>   | <b>148</b>  | <b>444</b>   | <b>1333</b>  | <b>4000</b>   |
| <b>Signal-BKG</b>            | <b>0</b> | <b>11</b>   | <b>33</b>   | <b>69</b>   | <b>156</b>  | <b>377</b>   | <b>1152</b>  | <b>3051</b>   |
| <b>Log (Concentration)</b>   |          | <b>0.74</b> | <b>1.22</b> | <b>1.69</b> | <b>2.17</b> | <b>2.65</b>  | <b>3.12</b>  | <b>3.60</b>   |
| <b>Log (Signal-BKG)</b>      |          | <b>1.04</b> | <b>1.52</b> | <b>1.84</b> | <b>2.19</b> | <b>2.58</b>  | <b>3.06</b>  | <b>3.48</b>   |
| Linear regression            | Slope    |             |             |             | Intercept   |              |              |               |
| log-log regression           | 0.77     |             |             |             | 0.00        |              |              |               |
|                              | 0.83     |             |             |             | 0.43        |              |              |               |
| <b>Lipocalin-2</b>           |          |             |             |             |             |              |              |               |
| <b>Concentration (pg/ml)</b> | <b>0</b> | <b>1</b>    | <b>4</b>    | <b>12</b>   | <b>37</b>   | <b>111</b>   | <b>333</b>   | <b>1000</b>   |
| <b>Signal-BKG</b>            | <b>0</b> | <b>70</b>   | <b>179</b>  | <b>699</b>  | <b>1674</b> | <b>5680</b>  | <b>11708</b> | <b>14915</b>  |
| <b>Log (Concentration)</b>   |          | <b>0.14</b> | <b>0.61</b> | <b>1.09</b> | <b>1.57</b> | <b>2.05</b>  | <b>2.52</b>  | <b>3.00</b>   |
| <b>Log (Signal-BKG)</b>      |          | <b>1.85</b> | <b>2.25</b> | <b>2.84</b> | <b>3.22</b> | <b>3.75</b>  | <b>4.07</b>  | <b>4.17</b>   |
| Linear regression            | Slope    |             |             |             | Intercept   |              |              |               |
| log-log regression           | 36.84    |             |             |             | 0.00        |              |              |               |
|                              | 0.96     |             |             |             | 1.72        |              |              |               |
| <b>L-Selectin</b>            |          |             |             |             |             |              |              |               |
| <b>Concentration (pg/ml)</b> | <b>0</b> | <b>137</b>  | <b>412</b>  | <b>1235</b> | <b>3704</b> | <b>11111</b> | <b>33333</b> | <b>100000</b> |
| <b>Signal-BKG</b>            | <b>0</b> | <b>1</b>    | <b>18</b>   | <b>72</b>   | <b>127</b>  | <b>570</b>   | <b>1766</b>  | <b>3848</b>   |
| <b>Log (Concentration)</b>   |          | <b>2.14</b> | <b>2.61</b> | <b>3.09</b> | <b>3.57</b> | <b>4.05</b>  | <b>4.52</b>  | <b>5.00</b>   |
| <b>Log (Signal-BKG)</b>      |          |             | <b>1.26</b> | <b>1.86</b> | <b>2.10</b> | <b>2.76</b>  | <b>3.25</b>  | <b>3.59</b>   |
| Linear regression            | Slope    |             |             |             | Intercept   |              |              |               |
| log-log regression           | 0.04     |             |             |             | 0.00        |              |              |               |
|                              | 0.98     |             |             |             | -1.28       |              |              |               |
| <b>LYVE-1</b>                |          |             |             |             |             |              |              |               |
| <b>Concentration (pg/ml)</b> | <b>0</b> | <b>3</b>    | <b>8</b>    | <b>25</b>   | <b>74</b>   | <b>222</b>   | <b>667</b>   | <b>2000</b>   |
| <b>Signal-BKG</b>            | <b>0</b> | <b>9</b>    | <b>43</b>   | <b>141</b>  | <b>387</b>  | <b>1335</b>  | <b>3683</b>  | <b>7151</b>   |
| <b>Log (Concentration)</b>   |          | <b>0.44</b> | <b>0.92</b> | <b>1.39</b> | <b>1.87</b> | <b>2.35</b>  | <b>2.82</b>  | <b>3.30</b>   |
| <b>Log (Signal-BKG)</b>      |          | <b>0.93</b> | <b>1.64</b> | <b>2.15</b> | <b>2.59</b> | <b>3.13</b>  | <b>3.57</b>  | <b>3.85</b>   |
| Linear regression            | Slope    |             |             |             | Intercept   |              |              |               |
| log-log regression           | 3.80     |             |             |             | 0.00        |              |              |               |
|                              | 1.02     |             |             |             | 0.65        |              |              |               |
| <b>MICA</b>                  |          |             |             |             |             |              |              |               |
| <b>Concentration (pg/ml)</b> | <b>0</b> | <b>14</b>   | <b>41</b>   | <b>123</b>  | <b>370</b>  | <b>1111</b>  | <b>3333</b>  | <b>10000</b>  |
| <b>Signal-BKG</b>            | <b>0</b> | <b>27</b>   | <b>110</b>  | <b>288</b>  | <b>709</b>  | <b>2094</b>  | <b>5339</b>  | <b>10467</b>  |
| <b>Log (Concentration)</b>   |          | <b>1.14</b> | <b>1.61</b> | <b>2.09</b> | <b>2.57</b> | <b>3.05</b>  | <b>3.52</b>  | <b>4.00</b>   |
| <b>Log (Signal-BKG)</b>      |          | <b>1.42</b> | <b>2.04</b> | <b>2.46</b> | <b>2.85</b> | <b>3.32</b>  | <b>3.73</b>  | <b>4.02</b>   |
| Linear regression            | Slope    |             |             |             | Intercept   |              |              |               |
| log-log regression           | 1.11     |             |             |             | 0.00        |              |              |               |
|                              | 0.90     |             |             |             | 0.52        |              |              |               |
| <b>MICB</b>                  |          |             |             |             |             |              |              |               |
| <b>Concentration (pg/ml)</b> | <b>0</b> | <b>21</b>   | <b>62</b>   | <b>185</b>  | <b>556</b>  | <b>1667</b>  | <b>5000</b>  | <b>15000</b>  |
| <b>Signal-BKG</b>            | <b>0</b> | <b>11</b>   | <b>29</b>   | <b>107</b>  | <b>165</b>  | <b>567</b>   | <b>1554</b>  | <b>4085</b>   |
| <b>Log (Concentration)</b>   |          | <b>1.31</b> | <b>1.79</b> | <b>2.27</b> | <b>2.74</b> | <b>3.22</b>  | <b>3.70</b>  | <b>4.18</b>   |
| <b>Log (Signal-BKG)</b>      |          | <b>1.06</b> | <b>1.46</b> | <b>2.03</b> | <b>2.22</b> | <b>2.75</b>  | <b>3.19</b>  | <b>3.61</b>   |
| Linear regression            | Slope    |             |             |             | Intercept   |              |              |               |
| log-log regression           | 0.28     |             |             |             | 0.00        |              |              |               |
|                              | 0.89     |             |             |             | -0.10       |              |              |               |

| <b>NRG1-b1</b>        |       |      |      |      |           |       |       |        |
|-----------------------|-------|------|------|------|-----------|-------|-------|--------|
| Concentration (pg/ml) | 0     | 21   | 62   | 185  | 556       | 1667  | 5000  | 15000  |
| Signal-BKG            | 0     | 29   | 122  | 290  | 632       | 1313  | 2500  | 3081   |
| Log (Concentration)   |       | 1.31 | 1.79 | 2.27 | 2.74      | 3.22  | 3.70  | 4.18   |
| Log (Signal-BKG)      |       |      | 2.09 | 2.46 | 2.80      | 3.12  | 3.40  | 3.49   |
| Linear regression     | Slope |      |      |      | Intercept |       |       |        |
| log-log regression    | 0.54  |      |      |      | 0.00      |       |       |        |
|                       | 0.69  |      |      |      | 0.89      |       |       |        |
| <b>PDGF Rb</b>        |       |      |      |      |           |       |       |        |
| Concentration (pg/ml) | 0     | 137  | 412  | 1235 | 3704      | 11111 | 33333 | 100000 |
| Signal-BKG            | 0     | 1336 | 3048 | 6977 | 12882     | 22475 | 30934 | 38650  |
| Log (Concentration)   |       | 2.14 | 2.61 | 3.09 | 3.57      | 4.05  | 4.52  | 5.00   |
| Log (Signal-BKG)      |       | 3.13 | 3.48 | 3.84 | 4.11      | 4.35  | 4.49  | 4.59   |
| Linear regression     | Slope |      |      |      | Intercept |       |       |        |
| log-log regression    | 2.21  |      |      |      | 0.00      |       |       |        |
|                       | 0.65  |      |      |      | 1.79      |       |       |        |
| <b>PECAM-1</b>        |       |      |      |      |           |       |       |        |
| Concentration (pg/ml) | 0     | 27   | 82   | 247  | 741       | 2222  | 6667  | 20000  |
| Signal-BKG            | 0     | 11   | 26   | 114  | 180       | 666   | 2006  | 5617   |
| Log (Concentration)   |       | 1.44 | 1.92 | 2.39 | 2.87      | 3.35  | 3.82  | 4.30   |
| Log (Signal-BKG)      |       | 1.05 | 1.42 | 2.06 | 2.26      | 2.82  | 3.30  | 3.75   |
| Linear regression     | Slope |      |      |      | Intercept |       |       |        |
| log-log regression    | 0.28  |      |      |      | 0.00      |       |       |        |
|                       | 0.95  |      |      |      | -0.33     |       |       |        |
| <b>RAGE</b>           |       |      |      |      |           |       |       |        |
| Concentration (pg/ml) | 0     | 14   | 41   | 123  | 370       | 1111  | 3333  | 10000  |
| Signal-BKG            | 0     | 82   | 189  | 394  | 832       | 2096  | 3545  | 6476   |
| Log (Concentration)   |       | 1.14 | 1.61 | 2.09 | 2.57      | 3.05  | 3.52  | 4.00   |
| Log (Signal-BKG)      |       | 1.91 | 2.28 | 2.60 | 2.92      | 3.32  | 3.55  | 3.81   |
| Linear regression     | Slope |      |      |      | Intercept |       |       |        |
| log-log regression    | 0.70  |      |      |      | 0.00      |       |       |        |
|                       | 0.67  |      |      |      | 1.19      |       |       |        |
| <b>TIM-1</b>          |       |      |      |      |           |       |       |        |
| Concentration (pg/ml) | 0     | 14   | 41   | 123  | 370       | 1111  | 3333  | 10000  |
| Signal-BKG            | 0     | 25   | 78   | 187  | 452       | 1513  | 4030  | 7781   |
| Log (Concentration)   |       | 1.14 | 1.61 | 2.09 | 2.57      | 3.05  | 3.52  | 4.00   |
| Log (Signal-BKG)      |       | 1.40 | 1.89 | 2.27 | 2.66      | 3.18  | 3.61  | 3.89   |
| Linear regression     | Slope |      |      |      | Intercept |       |       |        |
| log-log regression    | 0.83  |      |      |      | 0.00      |       |       |        |
|                       | 0.88  |      |      |      | 0.43      |       |       |        |
| <b>TRAIL R3</b>       |       |      |      |      |           |       |       |        |
| Concentration (pg/ml) | 0     | 7    | 21   | 62   | 185       | 556   | 1667  | 5000   |
| Signal-BKG            | 0     | 47   | 147  | 438  | 882       | 2526  | 5852  | 10431  |
| Log (Concentration)   |       | 0.84 | 1.31 | 1.79 | 2.27      | 2.74  | 3.22  | 3.70   |
| Log (Signal-BKG)      |       | 1.67 | 2.17 | 2.64 | 2.95      | 3.40  | 3.77  | 4.02   |
| Linear regression     | Slope |      |      |      | Intercept |       |       |        |
| log-log regression    | 3.63  |      |      |      | 0.00      |       |       |        |
|                       | 0.87  |      |      |      | 1.00      |       |       |        |
| <b>Trappin-2</b>      |       |      |      |      |           |       |       |        |
| Concentration (pg/ml) | 0     | 14   | 41   | 123  | 370       | 1111  | 3333  | 10000  |
| Signal-BKG            | 0     | 4    | 12   | 64   | 280       | 1297  | 3255  | 4572   |
| Log (Concentration)   |       | 1.14 | 1.61 | 2.09 | 2.57      | 3.05  | 3.52  | 4.00   |
| Log (Signal-BKG)      |       | 0.60 | 1.09 | 1.81 | 2.45      | 3.11  | 3.51  | 3.66   |
| Linear regression     | Slope |      |      |      | Intercept |       |       |        |
| log-log regression    | 0.99  |      |      |      | 0.00      |       |       |        |
|                       | 1.28  |      |      |      | -0.88     |       |       |        |
| <b>uPAR</b>           |       |      |      |      |           |       |       |        |
| Concentration (pg/ml) | 0     | 55   | 165  | 494  | 1481      | 4444  | 13333 | 40000  |
| Signal-BKG            | 0     | 114  | 271  | 740  | 1774      | 6231  | 16417 | 35068  |
| Log (Concentration)   |       | 1.74 | 2.22 | 2.69 | 3.17      | 3.65  | 4.12  | 4.60   |
| Log (Signal-BKG)      |       | 2.06 | 2.43 | 2.87 | 3.25      | 3.79  | 4.22  | 4.54   |
| Linear regression     | Slope |      |      |      | Intercept |       |       |        |
|                       | 0.92  |      |      |      | 0.00      |       |       |        |

|                       |       |      |      |      |      |           |       |        |
|-----------------------|-------|------|------|------|------|-----------|-------|--------|
| log-log regression    | 0.89  |      |      |      | 0.47 |           |       |        |
| <b>VCAM-1</b>         |       |      |      |      |      |           |       |        |
| Concentration (pg/ml) | 0     | 274  | 823  | 2469 | 7407 | 22222     | 66667 | 200000 |
| Signal-BKG            | 0     | 4    | 30   | 62   | 117  | 309       | 1193  | 2624   |
| Log (Concentration)   |       | 2.44 | 2.92 | 3.39 | 3.87 | 4.35      | 4.82  | 5.30   |
| Log (Signal-BKG)      |       |      | 1.47 | 1.80 | 2.07 | 2.49      | 3.08  | 3.42   |
| Linear regression     | Slope |      |      |      |      | Intercept |       |        |
| log-log regression    | 0.01  |      |      |      |      | 0.00      |       |        |
|                       | 0.84  |      |      |      |      | -1.05     |       |        |
| <b>XEDAR</b>          |       |      |      |      |      |           |       |        |
| Concentration (pg/ml) | 0     | 14   | 41   | 123  | 370  | 1111      | 3333  | 10000  |
| Signal-BKG            | 0     | 18   | 36   | 100  | 240  | 750       | 1801  | 3679   |
| Log (Concentration)   |       | 1.14 | 1.61 | 2.09 | 2.57 | 3.05      | 3.52  | 4.00   |
| Log (Signal-BKG)      |       | 1.25 | 1.56 | 2.00 | 2.38 | 2.88      | 3.26  | 3.57   |
| Linear regression     | Slope |      |      |      |      | Intercept |       |        |
| log-log regression    | 0.39  |      |      |      |      | 0.00      |       |        |
|                       | 0.84  |      |      |      |      | 0.26      |       |        |
| <b>BLC</b>            |       |      |      |      |      |           |       |        |
| Concentration (pg/ml) | 0     | 3    | 8    | 25   | 74   | 222       | 667   | 2000   |
| Signal-BKG            | 2     | 1    | 11   | 26   | 102  | 289       | 916   | 1815   |
| Log (Concentration)   |       | 0.44 | 0.92 | 1.39 | 1.87 | 2.35      | 2.82  | 3.30   |
| Log (Signal-BKG)      |       |      | 1.05 | 1.42 | 2.01 | 2.46      | 2.96  | 3.26   |
| Linear regression     | Slope |      |      |      |      | Intercept |       |        |
| log-log regression    | 1.37  |      |      |      |      | 0.00      |       |        |
|                       | 1.02  |      |      |      |      | 0.07      |       |        |
| <b>Eotaxin</b>        |       |      |      |      |      |           |       |        |
| Concentration (pg/ml) | 0     | 5    | 16   | 49   | 148  | 444       | 1333  | 4000   |
| Signal-BKG            | 0     | 55   | 164  | 572  | 1609 | 3183      | 5241  | 7221   |
| Log (Concentration)   |       | 0.74 | 1.22 | 1.69 | 2.17 | 2.65      | 3.12  | 3.60   |
| Log (Signal-BKG)      |       | 1.74 | 2.21 | 2.76 | 3.21 | 3.50      | 3.72  | 3.86   |
| Linear regression     | Slope |      |      |      |      | Intercept |       |        |
| log-log regression    | 7.58  |      |      |      |      | 0.00      |       |        |
|                       | 0.95  |      |      |      |      | 1.08      |       |        |
| <b>Eotaxin-2</b>      |       |      |      |      |      |           |       |        |
| Concentration (pg/ml) | 0     | 1    | 4    | 12   | 37   | 111       | 333   | 1000   |
| Signal-BKG            | 0     | 9    | 57   | 202  | 643  | 2193      | 8671  | 25327  |
| Log (Concentration)   |       | 0.14 | 0.61 | 1.09 | 1.57 | 2.05      | 2.52  | 3.00   |
| Log (Signal-BKG)      |       | 0.95 | 1.76 | 2.30 | 2.81 | 3.34      | 3.94  | 4.40   |
| Linear regression     | Slope |      |      |      |      | Intercept |       |        |
| log-log regression    | 25.32 |      |      |      |      | 0.00      |       |        |
|                       | 1.18  |      |      |      |      | 0.94      |       |        |
| <b>G-CSF</b>          |       |      |      |      |      |           |       |        |
| Concentration (pg/ml) | 0     | 27   | 82   | 247  | 741  | 2222      | 6667  | 20000  |
| Signal-BKG            | 0     | 477  | 1406 | 3704 | 9615 | 18214     | 27518 | 32112  |
| Log (Concentration)   |       | 1.44 | 1.92 | 2.39 | 2.87 | 3.35      | 3.82  | 4.30   |
| Log (Signal-BKG)      |       | 2.68 | 3.15 | 3.57 | 3.98 | 4.26      | 4.44  | 4.51   |
| Linear regression     | Slope |      |      |      |      | Intercept |       |        |
| log-log regression    | 8.76  |      |      |      |      | 0.00      |       |        |
|                       | 0.84  |      |      |      |      | 1.52      |       |        |
| <b>GM-CSF</b>         |       |      |      |      |      |           |       |        |
| Concentration (pg/ml) | 0     | 1    | 4    | 12   | 37   | 111       | 333   | 1000   |
| Signal-BKG            | 0     | 36   | 111  | 180  | 530  | 1228      | 3392  | 7383   |
| Log (Concentration)   |       | 0.14 | 0.61 | 1.09 | 1.57 | 2.05      | 2.52  | 3.00   |
| Log (Signal-BKG)      |       | 1.56 | 2.04 | 2.26 | 2.72 | 3.09      | 3.53  | 3.87   |
| Linear regression     | Slope |      |      |      |      | Intercept |       |        |
| log-log regression    | 7.71  |      |      |      |      | 0.00      |       |        |
|                       | 0.80  |      |      |      |      | 1.46      |       |        |
| <b>I-309</b>          |       |      |      |      |      |           |       |        |
| Concentration (pg/ml) | 0     | 5    | 16   | 49   | 148  | 444       | 1333  | 4000   |
| Signal-BKG            | 0     | 34   | 114  | 336  | 1410 | 3555      | 10019 | 12284  |
| Log (Concentration)   |       | 0.74 | 1.22 | 1.69 | 2.17 | 2.65      | 3.12  | 3.60   |
| Log (Signal-BKG)      |       | 1.54 | 2.06 | 2.53 | 3.15 | 3.55      | 4.00  | 4.09   |

Slope

Intercept

|                       |       |      |      |       |           |       |       |        |
|-----------------------|-------|------|------|-------|-----------|-------|-------|--------|
| Linear regression     | 7.58  |      |      |       | 0.00      |       |       |        |
| log-log regression    | 1.04  |      |      |       | 0.79      |       |       |        |
| <b>ICAM-1</b>         |       |      |      |       |           |       |       |        |
| Concentration (pg/ml) | 0     | 137  | 412  | 1235  | 3704      | 11111 | 33333 | 100000 |
| Signal-BKG            | 0     | 1467 | 5651 | 12343 | 28489     | 40692 | 56826 | 59884  |
| Log (Concentration)   |       | 2.14 | 2.61 | 3.09  | 3.57      | 4.05  | 4.52  | 5.00   |
| Log (Signal-BKG)      |       | 3.17 | 3.75 | 4.09  | 4.45      | 4.61  | 4.75  | 4.78   |
| Linear regression     | Slope |      |      |       | Intercept |       |       |        |
| log-log regression    | 4.14  |      |      |       | 0.00      |       |       |        |
|                       | 0.75  |      |      |       | 1.69      |       |       |        |
| <b>IFNg</b>           |       |      |      |       |           |       |       |        |
| Concentration (pg/ml) | 0     | 3    | 8    | 25    | 74        | 222   | 667   | 2000   |
| Signal-BKG            | 0     | 75   | 122  | 239   | 807       | 1544  | 5973  | 18558  |
| Log (Concentration)   |       | 0.44 | 0.92 | 1.39  | 1.87      | 2.35  | 2.82  | 3.30   |
| Log (Signal-BKG)      |       | 2.09 | 2.38 | 2.91  | 3.19      | 3.78  | 4.27  |        |
| Linear regression     | Slope |      |      |       | Intercept |       |       |        |
| log-log regression    | 9.22  |      |      |       | 0.00      |       |       |        |
|                       | 0.92  |      |      |       | 1.16      |       |       |        |
| <b>IL-1a</b>          |       |      |      |       |           |       |       |        |
| Concentration (pg/ml) | 0     | 3    | 8    | 25    | 74        | 222   | 667   | 2000   |
| Signal-BKG            | 0     | 19   | 56   | 143   | 540       | 2126  | 6699  | 17011  |
| Log (Concentration)   |       | 0.44 | 0.92 | 1.39  | 1.87      | 2.35  | 2.82  | 3.30   |
| Log (Signal-BKG)      |       | 1.28 | 1.75 | 2.16  | 2.73      | 3.33  | 3.83  | 4.23   |
| Linear regression     | Slope |      |      |       | Intercept |       |       |        |
| log-log regression    | 8.67  |      |      |       | 0.00      |       |       |        |
|                       | 1.06  |      |      |       | 0.77      |       |       |        |
| <b>IL-1b</b>          |       |      |      |       |           |       |       |        |
| Concentration (pg/ml) | 0     | 1    | 4    | 12    | 37        | 111   | 333   | 1000   |
| Signal-BKG            | 0     | 132  | 362  | 1062  | 2908      | 6822  | 12353 | 16106  |
| Log (Concentration)   |       | 0.14 | 0.61 | 1.09  | 1.57      | 2.05  | 2.52  | 3.00   |
| Log (Signal-BKG)      |       | 2.12 | 2.56 | 3.03  | 3.46      | 3.83  | 4.09  | 4.21   |
| Linear regression     | Slope |      |      |       | Intercept |       |       |        |
| log-log regression    | 63.40 |      |      |       | 0.00      |       |       |        |
|                       | 0.91  |      |      |       | 2.01      |       |       |        |
| <b>IL-1ra</b>         |       |      |      |       |           |       |       |        |
| Concentration (pg/ml) | 0     | 3    | 8    | 25    | 74        | 222   | 667   | 2000   |
| Signal-BKG            | 0     | 29   | 188  | 300   | 952       | 2746  | 6840  | 17201  |
| Log (Concentration)   |       | 0.44 | 0.92 | 1.39  | 1.87      | 2.35  | 2.82  | 3.30   |
| Log (Signal-BKG)      |       | 1.46 | 2.27 | 2.48  | 2.98      | 3.44  | 3.84  | 4.24   |
| Linear regression     | Slope |      |      |       | Intercept |       |       |        |
| log-log regression    | 8.81  |      |      |       | 0.00      |       |       |        |
|                       | 0.93  |      |      |       | 1.22      |       |       |        |
| <b>IL-2</b>           |       |      |      |       |           |       |       |        |
| Concentration (pg/ml) | 0     | 3    | 8    | 25    | 74        | 222   | 667   | 2000   |
| Signal-BKG            | 8     | 1    | 46   | 184   | 494       | 1977  | 7642  | 33205  |
| Log (Concentration)   |       | 0.44 | 0.92 | 1.39  | 1.87      | 2.35  | 2.82  | 3.30   |
| Log (Signal-BKG)      |       |      | 1.67 | 2.26  | 2.69      | 3.30  | 3.88  | 4.52   |
| Linear regression     | Slope |      |      |       | Intercept |       |       |        |
| log-log regression    | 16.00 |      |      |       | 0.00      |       |       |        |
|                       | 1.18  |      |      |       | 0.56      |       |       |        |
| <b>IL-4</b>           |       |      |      |       |           |       |       |        |
| Concentration (pg/ml) | 0     | 3    | 8    | 25    | 74        | 222   | 667   | 2000   |
| Signal-BKG            | 0     | 40   | 141  | 307   | 850       | 2081  | 5237  | 8739   |
| Log (Concentration)   |       | 0.44 | 0.92 | 1.39  | 1.87      | 2.35  | 2.82  | 3.30   |
| Log (Signal-BKG)      |       | 1.60 | 2.15 | 2.49  | 2.93      | 3.32  | 3.72  | 3.94   |
| Linear regression     | Slope |      |      |       | Intercept |       |       |        |
| log-log regression    | 8.05  |      |      |       | 0.00      |       |       |        |
|                       | 0.87  |      |      |       | 1.28      |       |       |        |
| <b>IL-5</b>           |       |      |      |       |           |       |       |        |
| Concentration (pg/ml) | 0     | 5    | 16   | 49    | 148       | 444   | 1333  | 4000   |
| Signal-BKG            | 0     | 34   | 112  | 304   | 1192      | 3521  | 9223  | 15274  |
| Log (Concentration)   |       | 0.74 | 1.22 | 1.69  | 2.17      | 2.65  | 3.12  | 3.60   |
| Log (Signal-BKG)      |       | 1.53 | 2.05 | 2.48  | 3.08      | 3.55  | 3.96  | 4.18   |

|                       |       |       |           |      |       |       |       |       |
|-----------------------|-------|-------|-----------|------|-------|-------|-------|-------|
| Linear regression     | Slope |       | Intercept |      |       |       |       |       |
| log-log regression    | 7.03  |       |           |      |       |       |       |       |
|                       | 1.03  |       |           |      |       |       |       |       |
| <b>IL-6</b>           |       |       |           |      |       |       |       |       |
| Concentration (pg/ml) | 0     | 3     | 8         | 25   | 74    | 222   | 667   | 2000  |
| Signal-BKG            | 0     | 23    | 141       | 532  | 1857  | 7511  | 27940 | 61124 |
| Log (Concentration)   |       | 0.44  | 0.92      | 1.39 | 1.87  | 2.35  | 2.82  | 3.30  |
| Log (Signal-BKG)      |       | 1.36  | 2.15      | 2.73 | 3.27  | 3.88  | 4.45  | 4.79  |
| Linear regression     | Slope |       | Intercept |      |       |       |       |       |
| log-log regression    | 31.71 |       |           |      |       |       |       |       |
|                       | 1.20  |       |           |      |       |       |       |       |
| <b>IL-6sR</b>         |       |       |           |      |       |       |       |       |
| Concentration (pg/ml) | 0     | 14    | 41        | 123  | 370   | 1111  | 3333  | 10000 |
| Signal-BKG            | 0     | 835   | 2321      | 6067 | 13223 | 25403 | 37785 | 45640 |
| Log (Concentration)   |       | 1.14  | 1.61      | 2.09 | 2.57  | 3.05  | 3.52  | 4.00  |
| Log (Signal-BKG)      |       | 2.92  | 3.37      | 3.78 | 4.12  | 4.40  | 4.58  | 4.66  |
| Linear regression     | Slope |       | Intercept |      |       |       |       |       |
| log-log regression    | 24.47 |       |           |      |       |       |       |       |
|                       | 0.78  |       |           |      |       |       |       |       |
| <b>IL-7</b>           |       |       |           |      |       |       |       |       |
| Concentration (pg/ml) | 0     | 5     | 16        | 49   | 148   | 444   | 1333  | 4000  |
| Signal-BKG            | 0     | 84    | 243       | 978  | 4616  | 20287 | 57513 | 65787 |
| Log (Concentration)   |       | 0.74  | 1.22      | 1.69 | 2.17  | 2.65  | 3.12  | 3.60  |
| Log (Signal-BKG)      |       | 1.92  | 2.39      | 2.99 | 3.66  | 4.31  | 4.76  | 4.82  |
| Linear regression     | Slope |       | Intercept |      |       |       |       |       |
| log-log regression    | 43.22 |       |           |      |       |       |       |       |
|                       | 1.24  |       |           |      |       |       |       |       |
| <b>IL-8</b>           |       |       |           |      |       |       |       |       |
| Concentration (pg/ml) | 0     | 1     | 2         | 6    | 19    | 56    | 167   | 500   |
| Signal-BKG            | 0     | 33    | 177       | 487  | 1526  | 5032  | 14431 | 37522 |
| Log (Concentration)   |       | -0.16 | 0.31      | 0.79 | 1.27  | 1.74  | 2.22  | 2.70  |
| Log (Signal-BKG)      |       | 1.52  | 2.25      | 2.69 | 3.18  | 3.70  | 4.16  | 4.57  |
| Linear regression     | Slope |       | Intercept |      |       |       |       |       |
| log-log regression    | 76.36 |       |           |      |       |       |       |       |
|                       | 1.05  |       |           |      |       |       |       |       |
| <b>IL-10</b>          |       |       |           |      |       |       |       |       |
| Concentration (pg/ml) | 0     | 5     | 16        | 49   | 148   | 444   | 1333  | 4000  |
| Signal-BKG            | 0     | 161   | 410       | 1224 | 3150  | 8599  | 20872 | 34798 |
| Log (Concentration)   |       | 0.74  | 1.22      | 1.69 | 2.17  | 2.65  | 3.12  | 3.60  |
| Log (Signal-BKG)      |       | 2.21  | 2.61      | 3.09 | 3.50  | 3.93  | 4.32  | 4.54  |
| Linear regression     | Slope |       | Intercept |      |       |       |       |       |
| log-log regression    | 16.09 |       |           |      |       |       |       |       |
|                       | 0.89  |       |           |      |       |       |       |       |
| <b>IL-11</b>          |       |       |           |      |       |       |       |       |
| Concentration (pg/ml) | 0     | 27    | 82        | 247  | 741   | 2222  | 6667  | 20000 |
| Signal-BKG            | 0     | 67    | 160       | 866  | 2290  | 6681  | 13465 | 21821 |
| Log (Concentration)   |       | 1.44  | 1.92      | 2.39 | 2.87  | 3.35  | 3.82  | 4.30  |
| Log (Signal-BKG)      |       | 1.82  | 2.21      | 2.94 | 3.36  | 3.82  | 4.13  | 4.34  |
| Linear regression     | Slope |       | Intercept |      |       |       |       |       |
| log-log regression    | 3.02  |       |           |      |       |       |       |       |
|                       | 1.08  |       |           |      |       |       |       |       |
| <b>IL-12p40</b>       |       |       |           |      |       |       |       |       |
| Concentration (pg/ml) | 0     | 14    | 41        | 123  | 370   | 1111  | 3333  | 10000 |
| Signal-BKG            | 0     | 238   | 513       | 1395 | 3624  | 10462 | 28690 | 62536 |
| Log (Concentration)   |       | 1.14  | 1.61      | 2.09 | 2.57  | 3.05  | 3.52  | 4.00  |
| Log (Signal-BKG)      |       | 2.38  | 2.71      | 3.14 | 3.56  | 4.02  | 4.46  | 4.80  |
| Linear regression     | Slope |       | Intercept |      |       |       |       |       |
| log-log regression    | 6.53  |       |           |      |       |       |       |       |
|                       | 0.87  |       |           |      |       |       |       |       |
| <b>IL-12p70</b>       |       |       |           |      |       |       |       |       |
| Concentration (pg/ml) | 0     | 1     | 2         | 6    | 19    | 56    | 167   | 500   |
| Signal-BKG            | 0     | 56    | 129       | 467  | 1248  | 3709  | 10017 | 22818 |
| Log (Concentration)   |       | -0.16 | 0.31      | 0.79 | 1.27  | 1.74  | 2.22  | 2.70  |



|                              |          |             |             |             |             |              |              |              |
|------------------------------|----------|-------------|-------------|-------------|-------------|--------------|--------------|--------------|
| <b>Log (Signal-BKG)</b>      |          | <b>1.75</b> | <b>2.11</b> | <b>2.67</b> | <b>3.10</b> | <b>3.57</b>  | <b>4.00</b>  | <b>4.36</b>  |
| Linear regression            | Slope    |             |             |             |             |              | Intercept    |              |
| log-log regression           | 47.33    |             |             |             |             |              | 0.00         |              |
|                              | 0.94     |             |             |             |             |              | 1.89         |              |
| <b>IL-13</b>                 |          |             |             |             |             |              |              |              |
| <b>Concentration (pg/ml)</b> | <b>0</b> | <b>1</b>    | <b>4</b>    | <b>12</b>   | <b>37</b>   | <b>111</b>   | <b>333</b>   | <b>1000</b>  |
| <b>Signal-BKG</b>            | <b>0</b> | <b>84</b>   | <b>164</b>  | <b>1247</b> | <b>2915</b> | <b>7443</b>  | <b>14881</b> | <b>33167</b> |
| <b>Log (Concentration)</b>   |          | <b>0.14</b> | <b>0.61</b> | <b>1.09</b> | <b>1.57</b> | <b>2.05</b>  | <b>2.52</b>  | <b>3.00</b>  |
| <b>Log (Signal-BKG)</b>      |          | <b>1.92</b> | <b>2.21</b> | <b>3.10</b> | <b>3.46</b> | <b>3.87</b>  | <b>4.17</b>  | <b>4.52</b>  |
| Linear regression            | Slope    |             |             |             |             |              | Intercept    |              |
| log-log regression           | 34.74    |             |             |             |             |              | 0.00         |              |
|                              | 0.93     |             |             |             |             |              | 1.86         |              |
| <b>IL-15</b>                 |          |             |             |             |             |              |              |              |
| <b>Concentration (pg/ml)</b> | <b>0</b> | <b>5</b>    | <b>16</b>   | <b>49</b>   | <b>148</b>  | <b>444</b>   | <b>1333</b>  | <b>4000</b>  |
| <b>Signal-BKG</b>            | <b>0</b> | <b>38</b>   | <b>47</b>   | <b>156</b>  | <b>438</b>  | <b>2417</b>  | <b>14202</b> | <b>63712</b> |
| <b>Log (Concentration)</b>   |          | <b>0.74</b> | <b>1.22</b> | <b>1.69</b> | <b>2.17</b> | <b>2.65</b>  | <b>3.12</b>  | <b>3.60</b>  |
| <b>Log (Signal-BKG)</b>      |          |             | <b>1.67</b> | <b>2.19</b> | <b>2.64</b> | <b>3.38</b>  | <b>4.15</b>  | <b>4.80</b>  |
| Linear regression            | Slope    |             |             |             |             |              | Intercept    |              |
| log-log regression           | 15.27    |             |             |             |             |              | 0.00         |              |
|                              | 1.33     |             |             |             |             |              | -0.07        |              |
| <b>IL-16</b>                 |          |             |             |             |             |              |              |              |
| <b>Concentration (pg/ml)</b> | <b>0</b> | <b>7</b>    | <b>21</b>   | <b>62</b>   | <b>185</b>  | <b>556</b>   | <b>1667</b>  | <b>5000</b>  |
| <b>Signal-BKG</b>            | <b>0</b> | <b>24</b>   | <b>77</b>   | <b>612</b>  | <b>2362</b> | <b>14604</b> | <b>44055</b> | <b>64535</b> |
| <b>Log (Concentration)</b>   |          | <b>0.84</b> | <b>1.31</b> | <b>1.79</b> | <b>2.27</b> | <b>2.74</b>  | <b>3.22</b>  | <b>3.70</b>  |
| <b>Log (Signal-BKG)</b>      |          | <b>1.38</b> | <b>1.89</b> | <b>2.79</b> | <b>3.37</b> | <b>4.16</b>  | <b>4.64</b>  | <b>4.81</b>  |
| Linear regression            | Slope    |             |             |             |             |              | Intercept    |              |
| log-log regression           | 26.24    |             |             |             |             |              | 0.00         |              |
|                              | 1.42     |             |             |             |             |              | 0.16         |              |
| <b>IL-17</b>                 |          |             |             |             |             |              |              |              |
| <b>Concentration (pg/ml)</b> | <b>0</b> | <b>5</b>    | <b>16</b>   | <b>49</b>   | <b>148</b>  | <b>444</b>   | <b>1333</b>  | <b>4000</b>  |
| <b>Signal-BKG</b>            | <b>0</b> | <b>22</b>   | <b>42</b>   | <b>118</b>  | <b>305</b>  | <b>879</b>   | <b>2248</b>  | <b>4871</b>  |
| <b>Log (Concentration)</b>   |          | <b>0.74</b> | <b>1.22</b> | <b>1.69</b> | <b>2.17</b> | <b>2.65</b>  | <b>3.12</b>  | <b>3.60</b>  |
| <b>Log (Signal-BKG)</b>      |          | <b>1.34</b> | <b>1.62</b> | <b>2.07</b> | <b>2.48</b> | <b>2.94</b>  | <b>3.35</b>  | <b>3.69</b>  |
| Linear regression            | Slope    |             |             |             |             |              | Intercept    |              |
| log-log regression           | 1.27     |             |             |             |             |              | 0.00         |              |
|                              | 0.85     |             |             |             |             |              | 0.66         |              |
| <b>MCP-1</b>                 |          |             |             |             |             |              |              |              |
| <b>Concentration (pg/ml)</b> | <b>0</b> | <b>14</b>   | <b>41</b>   | <b>123</b>  | <b>370</b>  | <b>1111</b>  | <b>3333</b>  | <b>10000</b> |
| <b>Signal-BKG</b>            | <b>5</b> | <b>1</b>    | <b>48</b>   | <b>258</b>  | <b>898</b>  | <b>3394</b>  | <b>8314</b>  | <b>15228</b> |
| <b>Log (Concentration)</b>   |          | <b>1.14</b> | <b>1.61</b> | <b>2.09</b> | <b>2.57</b> | <b>3.05</b>  | <b>3.52</b>  | <b>4.00</b>  |
| <b>Log (Signal-BKG)</b>      |          |             | <b>1.68</b> | <b>2.41</b> | <b>2.95</b> | <b>3.53</b>  | <b>3.92</b>  | <b>4.18</b>  |
| Linear regression            | Slope    |             |             |             |             |              | Intercept    |              |
| log-log regression           | 2.55     |             |             |             |             |              | 0.00         |              |
|                              | 1.17     |             |             |             |             |              | -0.11        |              |
| <b>MCSF</b>                  |          |             |             |             |             |              |              |              |
| <b>Concentration (pg/ml)</b> | <b>0</b> | <b>5</b>    | <b>16</b>   | <b>49</b>   | <b>148</b>  | <b>444</b>   | <b>1333</b>  | <b>4000</b>  |
| <b>Signal-BKG</b>            | <b>0</b> | <b>78</b>   | <b>304</b>  | <b>1043</b> | <b>3210</b> | <b>8563</b>  | <b>15574</b> | <b>17332</b> |
| <b>Log (Concentration)</b>   |          | <b>0.74</b> | <b>1.22</b> | <b>1.69</b> | <b>2.17</b> | <b>2.65</b>  | <b>3.12</b>  | <b>3.60</b>  |
| <b>Log (Signal-BKG)</b>      |          | <b>1.89</b> | <b>2.48</b> | <b>3.02</b> | <b>3.51</b> | <b>3.93</b>  | <b>4.19</b>  | <b>4.24</b>  |
| Linear regression            | Slope    |             |             |             |             |              | Intercept    |              |
| log-log regression           | 19.52    |             |             |             |             |              | 0.00         |              |
|                              | 1.07     |             |             |             |             |              | 1.16         |              |
| <b>MIG</b>                   |          |             |             |             |             |              |              |              |
| <b>Concentration (pg/ml)</b> | <b>0</b> | <b>7</b>    | <b>21</b>   | <b>62</b>   | <b>185</b>  | <b>556</b>   | <b>1667</b>  | <b>5000</b>  |
| <b>Signal-BKG</b>            | <b>0</b> | <b>28</b>   | <b>13</b>   | <b>59</b>   | <b>239</b>  | <b>811</b>   | <b>2616</b>  | <b>9432</b>  |
| <b>Log (Concentration)</b>   |          | <b>0.84</b> | <b>1.31</b> | <b>1.79</b> | <b>2.27</b> | <b>2.74</b>  | <b>3.22</b>  | <b>3.70</b>  |
| <b>Log (Signal-BKG)</b>      |          |             | <b>1.11</b> | <b>1.77</b> | <b>2.38</b> | <b>2.91</b>  | <b>3.42</b>  | <b>3.97</b>  |
| Linear regression            | Slope    |             |             |             |             |              | Intercept    |              |
| log-log regression           | 1.85     |             |             |             |             |              | 0.00         |              |
|                              | 1.19     |             |             |             |             |              | -0.38        |              |
| <b>MIP-1a</b>                |          |             |             |             |             |              |              |              |
| <b>Concentration (pg/ml)</b> | <b>0</b> | <b>14</b>   | <b>41</b>   | <b>123</b>  | <b>370</b>  | <b>1111</b>  | <b>3333</b>  | <b>10000</b> |
| <b>Signal-BKG</b>            | <b>0</b> | <b>14</b>   | <b>23</b>   | <b>61</b>   | <b>216</b>  | <b>823</b>   | <b>2744</b>  | <b>7277</b>  |

|                              |          |             |             |              |              |              |              |               |
|------------------------------|----------|-------------|-------------|--------------|--------------|--------------|--------------|---------------|
| <b>Log (Concentration)</b>   |          | <b>1.14</b> | <b>1.61</b> | <b>2.09</b>  | <b>2.57</b>  | <b>3.05</b>  | <b>3.52</b>  | <b>4.00</b>   |
| <b>Log (Signal-BKG)</b>      |          |             | <b>1.37</b> | <b>1.79</b>  | <b>2.33</b>  | <b>2.92</b>  | <b>3.44</b>  | <b>3.86</b>   |
| Linear regression            | Slope    |             |             |              |              | Intercept    |              |               |
| log-log regression           | 0.74     |             |             |              |              | 0.00         |              |               |
|                              | 1.08     |             |             |              |              | -0.41        |              |               |
| <b>MIP-1b</b>                |          |             |             |              |              |              |              |               |
| <b>Concentration (pg/ml)</b> | <b>0</b> | <b>5</b>    | <b>16</b>   | <b>49</b>    | <b>148</b>   | <b>444</b>   | <b>1333</b>  | <b>4000</b>   |
| <b>Signal-BKG</b>            | <b>0</b> | <b>18</b>   | <b>79</b>   | <b>269</b>   | <b>937</b>   | <b>3281</b>  | <b>8173</b>  | <b>12241</b>  |
| <b>Log (Concentration)</b>   |          | <b>0.74</b> | <b>1.22</b> | <b>1.69</b>  | <b>2.17</b>  | <b>2.65</b>  | <b>3.12</b>  | <b>3.60</b>   |
| <b>Log (Signal-BKG)</b>      |          | <b>1.25</b> | <b>1.90</b> | <b>2.43</b>  | <b>2.97</b>  | <b>3.52</b>  | <b>3.91</b>  | <b>4.09</b>   |
| Linear regression            | Slope    |             |             |              |              | Intercept    |              |               |
| log-log regression           | 6.25     |             |             |              |              | 0.00         |              |               |
|                              | 1.12     |             |             |              |              | 0.50         |              |               |
| <b>MIP-1d</b>                |          |             |             |              |              |              |              |               |
| <b>Concentration (pg/ml)</b> | <b>0</b> | <b>14</b>   | <b>41</b>   | <b>123</b>   | <b>370</b>   | <b>1111</b>  | <b>3333</b>  | <b>10000</b>  |
| <b>Signal-BKG</b>            | <b>0</b> | <b>1778</b> | <b>3749</b> | <b>9454</b>  | <b>14805</b> | <b>23859</b> | <b>27221</b> | <b>30300</b>  |
| <b>Log (Concentration)</b>   |          | <b>1.14</b> | <b>1.61</b> | <b>2.09</b>  | <b>2.57</b>  | <b>3.05</b>  | <b>3.52</b>  | <b>4.00</b>   |
| <b>Log (Signal-BKG)</b>      |          | <b>3.25</b> | <b>3.57</b> | <b>3.98</b>  | <b>4.17</b>  | <b>4.38</b>  | <b>4.43</b>  | <b>4.48</b>   |
| Linear regression            | Slope    |             |             |              |              | Intercept    |              |               |
| log-log regression           | 24.00    |             |             |              |              | 0.00         |              |               |
|                              | 0.60     |             |             |              |              | 2.62         |              |               |
| <b>PDGF-BB</b>               |          |             |             |              |              |              |              |               |
| <b>Concentration (pg/ml)</b> | <b>0</b> | <b>3</b>    | <b>8</b>    | <b>25</b>    | <b>74</b>    | <b>222</b>   | <b>667</b>   | <b>2000</b>   |
| <b>Signal-BKG</b>            | <b>0</b> | <b>218</b>  | <b>497</b>  | <b>1500</b>  | <b>3592</b>  | <b>9028</b>  | <b>20016</b> | <b>34490</b>  |
| <b>Log (Concentration)</b>   |          | <b>0.44</b> | <b>0.92</b> | <b>1.39</b>  | <b>1.87</b>  | <b>2.35</b>  | <b>2.82</b>  | <b>3.30</b>   |
| <b>Log (Signal-BKG)</b>      |          | <b>2.34</b> | <b>2.70</b> | <b>3.18</b>  | <b>3.56</b>  | <b>3.96</b>  | <b>4.30</b>  | <b>4.54</b>   |
| Linear regression            | Slope    |             |             |              |              | Intercept    |              |               |
| log-log regression           | 31.32    |             |             |              |              | 0.00         |              |               |
|                              | 0.84     |             |             |              |              | 1.97         |              |               |
| <b>RANTES</b>                |          |             |             |              |              |              |              |               |
| <b>Concentration (pg/ml)</b> | <b>0</b> | <b>274</b>  | <b>823</b>  | <b>2469</b>  | <b>7407</b>  | <b>22222</b> | <b>66667</b> | <b>200000</b> |
| <b>Signal-BKG</b>            | <b>0</b> | <b>1012</b> | <b>4479</b> | <b>12409</b> | <b>32858</b> | <b>44063</b> | <b>43874</b> | <b>41059</b>  |
| <b>Log (Concentration)</b>   |          | <b>2.44</b> | <b>2.92</b> | <b>3.39</b>  | <b>3.87</b>  | <b>4.35</b>  | <b>4.82</b>  | <b>5.30</b>   |
| <b>Log (Signal-BKG)</b>      |          | <b>3.01</b> | <b>3.65</b> | <b>4.09</b>  | <b>4.52</b>  | <b>4.64</b>  | <b>4.64</b>  | <b>4.61</b>   |
| Linear regression            | Slope    |             |             |              |              | Intercept    |              |               |
| log-log regression           | 4.50     |             |             |              |              | 0.00         |              |               |
|                              | 1.04     |             |             |              |              | 0.53         |              |               |
| <b>TIMP-1</b>                |          |             |             |              |              |              |              |               |
| <b>Concentration (pg/ml)</b> | <b>0</b> | <b>55</b>   | <b>165</b>  | <b>494</b>   | <b>1481</b>  | <b>4444</b>  | <b>13333</b> | <b>40000</b>  |
| <b>Signal-BKG</b>            | <b>0</b> | <b>68</b>   | <b>323</b>  | <b>1373</b>  | <b>3640</b>  | <b>6973</b>  | <b>10983</b> | <b>13686</b>  |
| <b>Log (Concentration)</b>   |          | <b>1.74</b> | <b>2.22</b> | <b>2.69</b>  | <b>3.17</b>  | <b>3.65</b>  | <b>4.12</b>  | <b>4.60</b>   |
| <b>Log (Signal-BKG)</b>      |          |             | <b>2.51</b> | <b>3.14</b>  | <b>3.56</b>  | <b>3.84</b>  | <b>4.04</b>  | <b>4.14</b>   |
| Linear regression            | Slope    |             |             |              |              | Intercept    |              |               |
| log-log regression           | 0.92     |             |             |              |              | 0.00         |              |               |
|                              | 0.79     |             |             |              |              | 0.91         |              |               |
| <b>TIMP-2</b>                |          |             |             |              |              |              |              |               |
| <b>Concentration (pg/ml)</b> | <b>0</b> | <b>55</b>   | <b>165</b>  | <b>494</b>   | <b>1481</b>  | <b>4444</b>  | <b>13333</b> | <b>40000</b>  |
| <b>Signal-BKG</b>            | <b>0</b> | <b>97</b>   | <b>240</b>  | <b>629</b>   | <b>1415</b>  | <b>2502</b>  | <b>4076</b>  | <b>4956</b>   |
| <b>Log (Concentration)</b>   |          | <b>1.74</b> | <b>2.22</b> | <b>2.69</b>  | <b>3.17</b>  | <b>3.65</b>  | <b>4.12</b>  | <b>4.60</b>   |
| <b>Log (Signal-BKG)</b>      |          | <b>1.99</b> | <b>2.38</b> | <b>2.80</b>  | <b>3.15</b>  | <b>3.40</b>  | <b>3.61</b>  | <b>3.70</b>   |
| Linear regression            | Slope    |             |             |              |              | Intercept    |              |               |
| log-log regression           | 0.34     |             |             |              |              | 0.00         |              |               |
|                              | 0.69     |             |             |              |              | 0.86         |              |               |
| <b>TNFa</b>                  |          |             |             |              |              |              |              |               |
| <b>Concentration (pg/ml)</b> | <b>0</b> | <b>3</b>    | <b>8</b>    | <b>25</b>    | <b>74</b>    | <b>222</b>   | <b>667</b>   | <b>2000</b>   |
| <b>Signal-BKG</b>            | <b>0</b> | <b>30</b>   | <b>47</b>   | <b>207</b>   | <b>581</b>   | <b>2133</b>  | <b>6070</b>  | <b>18455</b>  |
| <b>Log (Concentration)</b>   |          | <b>0.44</b> | <b>0.92</b> | <b>1.39</b>  | <b>1.87</b>  | <b>2.35</b>  | <b>2.82</b>  | <b>3.30</b>   |
| <b>Log (Signal-BKG)</b>      |          | <b>1.47</b> | <b>1.67</b> | <b>2.32</b>  | <b>2.76</b>  | <b>3.33</b>  | <b>3.78</b>  | <b>4.27</b>   |
| Linear regression            | Slope    |             |             |              |              | Intercept    |              |               |
| log-log regression           | 9.22     |             |             |              |              | 0.00         |              |               |
|                              | 1.02     |             |             |              |              | 0.90         |              |               |
| <b>TNFb</b>                  |          |             |             |              |              |              |              |               |
| <b>Concentration (pg/ml)</b> | <b>0</b> | <b>27</b>   | <b>82</b>   | <b>247</b>   | <b>741</b>   | <b>2222</b>  | <b>6667</b>  | <b>20000</b>  |

|                              |          |             |             |              |              |               |               |                |
|------------------------------|----------|-------------|-------------|--------------|--------------|---------------|---------------|----------------|
| <b>Signal-BKG</b>            | <b>0</b> | <b>1219</b> | <b>3380</b> | <b>9219</b>  | <b>25008</b> | <b>61838</b>  | <b>64999</b>  | <b>65430</b>   |
| <b>Log (Concentration)</b>   |          | <b>1.44</b> | <b>1.92</b> | <b>2.39</b>  | <b>2.87</b>  | <b>3.35</b>   | <b>3.82</b>   | <b>4.30</b>    |
| <b>Log (Signal-BKG)</b>      |          | <b>3.09</b> | <b>3.53</b> | <b>3.96</b>  | <b>4.40</b>  | <b>4.79</b>   | <b>4.81</b>   | <b>4.82</b>    |
| Linear regression            | Slope    |             |             |              | Intercept    |               |               |                |
| log-log regression           | 28.54    |             |             |              | 0.00         |               |               |                |
|                              | 0.90     |             |             |              | 1.81         |               |               |                |
| <b>TNF RI</b>                |          |             |             |              |              |               |               |                |
| <b>Concentration (pg/ml)</b> | <b>0</b> | <b>55</b>   | <b>165</b>  | <b>494</b>   | <b>1481</b>  | <b>4444</b>   | <b>13333</b>  | <b>40000</b>   |
| <b>Signal-BKG</b>            | <b>0</b> | <b>552</b>  | <b>1312</b> | <b>3797</b>  | <b>7339</b>  | <b>11839</b>  | <b>17091</b>  | <b>18951</b>   |
| <b>Log (Concentration)</b>   |          | <b>1.74</b> | <b>2.22</b> | <b>2.69</b>  | <b>3.17</b>  | <b>3.65</b>   | <b>4.12</b>   | <b>4.60</b>    |
| <b>Log (Signal-BKG)</b>      |          | <b>2.74</b> | <b>3.12</b> | <b>3.58</b>  | <b>3.87</b>  | <b>4.07</b>   | <b>4.23</b>   | <b>4.28</b>    |
| Linear regression            | Slope    |             |             |              | Intercept    |               |               |                |
| log-log regression           | 2.95     |             |             |              | 0.00         |               |               |                |
|                              | 0.71     |             |             |              | 1.55         |               |               |                |
| <b>TNF RII</b>               |          |             |             |              |              |               |               |                |
| <b>Concentration (pg/ml)</b> | <b>0</b> | <b>55</b>   | <b>165</b>  | <b>494</b>   | <b>1481</b>  | <b>4444</b>   | <b>13333</b>  | <b>40000</b>   |
| <b>Signal-BKG</b>            | <b>0</b> | <b>1902</b> | <b>4800</b> | <b>9284</b>  | <b>13730</b> | <b>19884</b>  | <b>23442</b>  | <b>22765</b>   |
| <b>Log (Concentration)</b>   |          | <b>1.74</b> | <b>2.22</b> | <b>2.69</b>  | <b>3.17</b>  | <b>3.65</b>   | <b>4.12</b>   | <b>4.60</b>    |
| <b>Log (Signal-BKG)</b>      |          | <b>3.28</b> | <b>3.68</b> | <b>3.97</b>  | <b>4.14</b>  | <b>4.30</b>   | <b>4.37</b>   | <b>4.36</b>    |
| Linear regression            | Slope    |             |             |              | Intercept    |               |               |                |
| log-log regression           | 5.14     |             |             |              | 0.00         |               |               |                |
|                              | 0.52     |             |             |              | 2.46         |               |               |                |
| <b>Activin A</b>             |          |             |             |              |              |               |               |                |
| <b>Concentration (pg/ml)</b> | <b>0</b> | <b>137</b>  | <b>412</b>  | <b>1235</b>  | <b>3704</b>  | <b>11111</b>  | <b>33333</b>  | <b>100000</b>  |
| <b>Signal-BKG</b>            | <b>0</b> | <b>14</b>   | <b>83</b>   | <b>376</b>   | <b>2918</b>  | <b>8005</b>   | <b>9323</b>   | <b>11249</b>   |
| <b>Log (Concentration)</b>   |          | <b>2.14</b> | <b>2.61</b> | <b>3.09</b>  | <b>3.57</b>  | <b>4.05</b>   | <b>4.52</b>   | <b>5.00</b>    |
| <b>Log (Signal-BKG)</b>      |          | <b>1.16</b> | <b>1.92</b> | <b>2.57</b>  | <b>3.47</b>  | <b>3.90</b>   | <b>3.97</b>   | <b>4.05</b>    |
| Linear regression            | Slope    |             |             |              | Intercept    |               |               |                |
| log-log regression           | 0.72     |             |             |              | 0.00         |               |               |                |
|                              | 1.48     |             |             |              | -1.96        |               |               |                |
| <b>AgRP</b>                  |          |             |             |              |              |               |               |                |
| <b>Concentration (pg/ml)</b> | <b>0</b> | <b>14</b>   | <b>41</b>   | <b>123</b>   | <b>370</b>   | <b>1111</b>   | <b>3333</b>   | <b>10000</b>   |
| <b>Signal-BKG</b>            | <b>0</b> | <b>16</b>   | <b>25</b>   | <b>52</b>    | <b>180</b>   | <b>574</b>    | <b>2120</b>   | <b>5744</b>    |
| <b>Log (Concentration)</b>   |          | <b>1.14</b> | <b>1.61</b> | <b>2.09</b>  | <b>2.57</b>  | <b>3.05</b>   | <b>3.52</b>   | <b>4.00</b>    |
| <b>Log (Signal-BKG)</b>      |          |             | <b>1.40</b> | <b>1.72</b>  | <b>2.26</b>  | <b>2.76</b>   | <b>3.33</b>   | <b>3.76</b>    |
| Linear regression            | Slope    |             |             |              | Intercept    |               |               |                |
| log-log regression           | 0.58     |             |             |              | 0.00         |               |               |                |
|                              | 1.02     |             |             |              | -0.34        |               |               |                |
| <b>ANG</b>                   |          |             |             |              |              |               |               |                |
| <b>Concentration (pg/ml)</b> | <b>0</b> | <b>3</b>    | <b>8</b>    | <b>25</b>    | <b>74</b>    | <b>222</b>    | <b>667</b>    | <b>2000</b>    |
| <b>Signal-BKG</b>            | <b>0</b> | <b>25</b>   | <b>98</b>   | <b>290</b>   | <b>827</b>   | <b>2052</b>   | <b>4807</b>   | <b>10645</b>   |
| <b>Log (Concentration)</b>   |          | <b>0.44</b> | <b>0.92</b> | <b>1.39</b>  | <b>1.87</b>  | <b>2.35</b>   | <b>2.82</b>   | <b>3.30</b>    |
| <b>Log (Signal-BKG)</b>      |          | <b>1.39</b> | <b>1.99</b> | <b>2.46</b>  | <b>2.92</b>  | <b>3.31</b>   | <b>3.68</b>   | <b>4.03</b>    |
| Linear regression            | Slope    |             |             |              | Intercept    |               |               |                |
| log-log regression           | 5.56     |             |             |              | 0.00         |               |               |                |
|                              | 0.91     |             |             |              | 1.13         |               |               |                |
| <b>ANG-1</b>                 |          |             |             |              |              |               |               |                |
| <b>Concentration (pg/ml)</b> | <b>0</b> | <b>55</b>   | <b>165</b>  | <b>494</b>   | <b>1481</b>  | <b>4444</b>   | <b>13333</b>  | <b>40000</b>   |
| <b>Signal-BKG</b>            | <b>0</b> | <b>17</b>   | <b>64</b>   | <b>171</b>   | <b>346</b>   | <b>1005</b>   | <b>2612</b>   | <b>7226</b>    |
| <b>Log (Concentration)</b>   |          | <b>1.74</b> | <b>2.22</b> | <b>2.69</b>  | <b>3.17</b>  | <b>3.65</b>   | <b>4.12</b>   | <b>4.60</b>    |
| <b>Log (Signal-BKG)</b>      |          | <b>1.23</b> | <b>1.81</b> | <b>2.23</b>  | <b>2.54</b>  | <b>3.00</b>   | <b>3.42</b>   | <b>3.86</b>    |
| Linear regression            | Slope    |             |             |              | Intercept    |               |               |                |
| log-log regression           | 0.18     |             |             |              | 0.00         |               |               |                |
|                              | 0.89     |             |             |              | -0.24        |               |               |                |
| <b>Angiostatin</b>           |          |             |             |              |              |               |               |                |
| <b>Concentration (pg/ml)</b> | <b>0</b> | <b>1372</b> | <b>4115</b> | <b>12346</b> | <b>37037</b> | <b>111111</b> | <b>333333</b> | <b>1000000</b> |
| <b>Signal-BKG</b>            | <b>0</b> | <b>22</b>   | <b>57</b>   | <b>177</b>   | <b>552</b>   | <b>1499</b>   | <b>4024</b>   | <b>8975</b>    |
| <b>Log (Concentration)</b>   |          | <b>3.14</b> | <b>3.61</b> | <b>4.09</b>  | <b>4.57</b>  | <b>5.05</b>   | <b>5.52</b>   | <b>6.00</b>    |
| <b>Log (Signal-BKG)</b>      |          | <b>1.34</b> | <b>1.75</b> | <b>2.25</b>  | <b>2.74</b>  | <b>3.18</b>   | <b>3.60</b>   | <b>3.95</b>    |
| Linear regression            | Slope    |             |             |              | Intercept    |               |               |                |
| log-log regression           | 0.01     |             |             |              | 0.00         |               |               |                |
|                              | 0.93     |             |             |              | -1.57        |               |               |                |
| <b>Catheprin S</b>           |          |             |             |              |              |               |               |                |

|                              |          |             |             |             |             |             |              |              |
|------------------------------|----------|-------------|-------------|-------------|-------------|-------------|--------------|--------------|
| <b>Concentration (pg/ml)</b> | <b>0</b> | <b>14</b>   | <b>41</b>   | <b>123</b>  | <b>370</b>  | <b>1111</b> | <b>3333</b>  | <b>10000</b> |
| <b>Signal-BKG</b>            | <b>0</b> | <b>13</b>   | <b>54</b>   | <b>101</b>  | <b>237</b>  | <b>595</b>  | <b>1744</b>  | <b>4667</b>  |
| <b>Log (Concentration)</b>   |          | <b>1.14</b> | <b>1.61</b> | <b>2.09</b> | <b>2.57</b> | <b>3.05</b> | <b>3.52</b>  | <b>4.00</b>  |
| <b>Log (Signal-BKG)</b>      |          | <b>1.11</b> | <b>1.73</b> | <b>2.00</b> | <b>2.37</b> | <b>2.77</b> | <b>3.24</b>  | <b>3.67</b>  |
| Linear regression            | Slope    |             |             |             |             | Intercept   |              |              |
| log-log regression           | 0.47     |             |             |             |             | 0.00        |              |              |
|                              | 0.86     |             |             |             |             | 0.21        |              |              |
| <b>CD 40</b>                 |          |             |             |             |             |             |              |              |
| <b>Concentration (pg/ml)</b> | <b>0</b> | <b>14</b>   | <b>41</b>   | <b>123</b>  | <b>370</b>  | <b>1111</b> | <b>3333</b>  | <b>10000</b> |
| <b>Signal-BKG</b>            | <b>0</b> | <b>9</b>    | <b>49</b>   | <b>93</b>   | <b>215</b>  | <b>421</b>  | <b>1028</b>  | <b>2422</b>  |
| <b>Log (Concentration)</b>   |          | <b>1.14</b> | <b>1.61</b> | <b>2.09</b> | <b>2.57</b> | <b>3.05</b> | <b>3.52</b>  | <b>4.00</b>  |
| <b>Log (Signal-BKG)</b>      |          | <b>1.69</b> | <b>1.97</b> | <b>2.33</b> | <b>2.62</b> | <b>3.01</b> | <b>3.38</b>  | <b>3.38</b>  |
| Linear regression            | Slope    |             |             |             |             | Intercept   |              |              |
| log-log regression           | 0.25     |             |             |             |             | 0.00        |              |              |
|                              | 0.71     |             |             |             |             | 0.50        |              |              |
| <b>Cripto-1</b>              |          |             |             |             |             |             |              |              |
| <b>Concentration (pg/ml)</b> | <b>0</b> | <b>14</b>   | <b>41</b>   | <b>123</b>  | <b>370</b>  | <b>1111</b> | <b>3333</b>  | <b>10000</b> |
| <b>Signal-BKG</b>            | <b>0</b> | <b>5</b>    | <b>20</b>   | <b>77</b>   | <b>517</b>  | <b>2286</b> | <b>9782</b>  | <b>18857</b> |
| <b>Log (Concentration)</b>   |          | <b>1.14</b> | <b>1.61</b> | <b>2.09</b> | <b>2.57</b> | <b>3.05</b> | <b>3.52</b>  | <b>4.00</b>  |
| <b>Log (Signal-BKG)</b>      |          | <b>0.66</b> | <b>1.29</b> | <b>1.89</b> | <b>2.71</b> | <b>3.36</b> | <b>3.99</b>  | <b>4.28</b>  |
| Linear regression            | Slope    |             |             |             |             | Intercept   |              |              |
| log-log regression           | 2.83     |             |             |             |             | 0.00        |              |              |
|                              | 1.42     |             |             |             |             | -0.99       |              |              |
| <b>DAN</b>                   |          |             |             |             |             |             |              |              |
| <b>Concentration (pg/ml)</b> | <b>0</b> | <b>55</b>   | <b>165</b>  | <b>494</b>  | <b>1481</b> | <b>4444</b> | <b>13333</b> | <b>40000</b> |
| <b>Signal-BKG</b>            | <b>0</b> | <b>4</b>    | <b>13</b>   | <b>25</b>   | <b>86</b>   | <b>214</b>  | <b>674</b>   | <b>1265</b>  |
| <b>Log (Concentration)</b>   |          | <b>1.74</b> | <b>2.22</b> | <b>2.69</b> | <b>3.17</b> | <b>3.65</b> | <b>4.12</b>  | <b>4.60</b>  |
| <b>Log (Signal-BKG)</b>      |          | <b>0.65</b> | <b>1.11</b> | <b>1.39</b> | <b>1.93</b> | <b>2.33</b> | <b>2.83</b>  | <b>3.10</b>  |
| Linear regression            | Slope    |             |             |             |             | Intercept   |              |              |
| log-log regression           | 0.03     |             |             |             |             | 0.00        |              |              |
|                              | 0.88     |             |             |             |             | -0.88       |              |              |
| <b>DKK-1</b>                 |          |             |             |             |             |             |              |              |
| <b>Concentration (pg/ml)</b> | <b>0</b> | <b>110</b>  | <b>329</b>  | <b>988</b>  | <b>2963</b> | <b>8889</b> | <b>26667</b> | <b>80000</b> |
| <b>Signal-BKG</b>            | <b>1</b> | <b>1</b>    | <b>9</b>    | <b>16</b>   | <b>27</b>   | <b>53</b>   | <b>117</b>   | <b>394</b>   |
| <b>Log (Concentration)</b>   |          | <b>2.04</b> | <b>2.52</b> | <b>2.99</b> | <b>3.47</b> | <b>3.95</b> | <b>4.43</b>  | <b>4.90</b>  |
| <b>Log (Signal-BKG)</b>      |          | <b>0.94</b> | <b>1.19</b> | <b>1.42</b> | <b>1.73</b> | <b>2.07</b> | <b>2.60</b>  | <b>2.60</b>  |
| Linear regression            | Slope    |             |             |             |             | Intercept   |              |              |
| log-log regression           | 0.00     |             |             |             |             | 0.00        |              |              |
|                              | 0.67     |             |             |             |             | -0.84       |              |              |
| <b>E-Cadherin</b>            |          |             |             |             |             |             |              |              |
| <b>Concentration (pg/ml)</b> | <b>0</b> | <b>110</b>  | <b>329</b>  | <b>988</b>  | <b>2963</b> | <b>8889</b> | <b>26667</b> | <b>80000</b> |
| <b>Signal-BKG</b>            | <b>0</b> | <b>44</b>   | <b>105</b>  | <b>230</b>  | <b>552</b>  | <b>1037</b> | <b>1666</b>  | <b>2398</b>  |
| <b>Log (Concentration)</b>   |          | <b>2.04</b> | <b>2.52</b> | <b>2.99</b> | <b>3.47</b> | <b>3.95</b> | <b>4.43</b>  | <b>4.90</b>  |
| <b>Log (Signal-BKG)</b>      |          | <b>1.65</b> | <b>2.02</b> | <b>2.36</b> | <b>2.74</b> | <b>3.02</b> | <b>3.22</b>  | <b>3.38</b>  |
| Linear regression            | Slope    |             |             |             |             | Intercept   |              |              |
| log-log regression           | 0.13     |             |             |             |             | 0.00        |              |              |
|                              | 0.72     |             |             |             |             | 0.19        |              |              |
| <b>EpCAM</b>                 |          |             |             |             |             |             |              |              |
| <b>Concentration (pg/ml)</b> | <b>0</b> | <b>27</b>   | <b>82</b>   | <b>247</b>  | <b>741</b>  | <b>2222</b> | <b>6667</b>  | <b>20000</b> |
| <b>Signal-BKG</b>            | <b>0</b> | <b>63</b>   | <b>194</b>  | <b>468</b>  | <b>1209</b> | <b>2539</b> | <b>6610</b>  | <b>9534</b>  |
| <b>Log (Concentration)</b>   |          | <b>1.44</b> | <b>1.92</b> | <b>2.39</b> | <b>2.87</b> | <b>3.35</b> | <b>3.82</b>  | <b>4.30</b>  |
| <b>Log (Signal-BKG)</b>      |          | <b>1.80</b> | <b>2.29</b> | <b>2.67</b> | <b>3.08</b> | <b>3.40</b> | <b>3.82</b>  | <b>3.98</b>  |
| Linear regression            | Slope    |             |             |             |             | Intercept   |              |              |
| log-log regression           | 1.01     |             |             |             |             | 0.00        |              |              |
|                              | 0.83     |             |             |             |             | 0.66        |              |              |
| <b>FAS L</b>                 |          |             |             |             |             |             |              |              |
| <b>Concentration (pg/ml)</b> | <b>0</b> | <b>3</b>    | <b>8</b>    | <b>25</b>   | <b>74</b>   | <b>222</b>  | <b>667</b>   | <b>2000</b>  |
| <b>Signal-BKG</b>            | <b>0</b> | <b>29</b>   | <b>59</b>   | <b>110</b>  | <b>300</b>  | <b>607</b>  | <b>1480</b>  | <b>3235</b>  |
| <b>Log (Concentration)</b>   |          | <b>0.44</b> | <b>0.92</b> | <b>1.39</b> | <b>1.87</b> | <b>2.35</b> | <b>2.82</b>  | <b>3.30</b>  |
| <b>Log (Signal-BKG)</b>      |          | <b>1.46</b> | <b>1.77</b> | <b>2.04</b> | <b>2.48</b> | <b>2.78</b> | <b>3.17</b>  | <b>3.51</b>  |
| Linear regression            | Slope    |             |             |             |             | Intercept   |              |              |
| log-log regression           | 1.69     |             |             |             |             | 0.00        |              |              |
|                              | 0.73     |             |             |             |             | 1.10        |              |              |

| <b>Fcr RIB/C</b>             |          |             |             |             |             |              |              |               |
|------------------------------|----------|-------------|-------------|-------------|-------------|--------------|--------------|---------------|
| <b>Concentration (pg/ml)</b> | <b>0</b> | <b>14</b>   | <b>41</b>   | <b>123</b>  | <b>370</b>  | <b>1111</b>  | <b>3333</b>  | <b>10000</b>  |
| <b>Signal-BKG</b>            | <b>0</b> | <b>5</b>    | <b>13</b>   | <b>41</b>   | <b>194</b>  | <b>746</b>   | <b>2795</b>  | <b>5006</b>   |
| <b>Log (Concentration)</b>   |          | <b>1.14</b> | <b>1.61</b> | <b>2.09</b> | <b>2.57</b> | <b>3.05</b>  | <b>3.52</b>  | <b>4.00</b>   |
| <b>Log (Signal-BKG)</b>      |          | <b>0.71</b> | <b>1.11</b> | <b>1.61</b> | <b>2.29</b> | <b>2.87</b>  | <b>3.45</b>  | <b>3.70</b>   |
| Linear regression            | Slope    |             |             |             | Intercept   |              |              |               |
| log-log regression           | 0.82     |             |             |             | 0.00        |              |              |               |
|                              | 1.17     |             |             |             | -0.73       |              |              |               |
| <b>Follistatin</b>           |          |             |             |             |             |              |              |               |
| <b>Concentration (pg/ml)</b> | <b>0</b> | <b>55</b>   | <b>165</b>  | <b>494</b>  | <b>1481</b> | <b>4444</b>  | <b>13333</b> | <b>40000</b>  |
| <b>Signal-BKG</b>            | <b>0</b> | <b>55</b>   | <b>129</b>  | <b>410</b>  | <b>1009</b> | <b>2445</b>  | <b>8533</b>  | <b>16183</b>  |
| <b>Log (Concentration)</b>   |          | <b>1.74</b> | <b>2.22</b> | <b>2.69</b> | <b>3.17</b> | <b>3.65</b>  | <b>4.12</b>  | <b>4.60</b>   |
| <b>Log (Signal-BKG)</b>      |          | <b>1.74</b> | <b>2.11</b> | <b>2.61</b> | <b>3.00</b> | <b>3.39</b>  | <b>3.93</b>  | <b>4.21</b>   |
| Linear regression            | Slope    |             |             |             | Intercept   |              |              |               |
| log-log regression           | 0.43     |             |             |             | 0.00        |              |              |               |
|                              | 0.88     |             |             |             | 0.20        |              |              |               |
| <b>Galectin-7</b>            |          |             |             |             |             |              |              |               |
| <b>Concentration (pg/ml)</b> | <b>0</b> | <b>137</b>  | <b>412</b>  | <b>1235</b> | <b>3704</b> | <b>11111</b> | <b>33333</b> | <b>100000</b> |
| <b>Signal-BKG</b>            | <b>0</b> | <b>13</b>   | <b>86</b>   | <b>181</b>  | <b>586</b>  | <b>1279</b>  | <b>3787</b>  | <b>5633</b>   |
| <b>Log (Concentration)</b>   |          | <b>2.14</b> | <b>2.61</b> | <b>3.09</b> | <b>3.57</b> | <b>4.05</b>  | <b>4.52</b>  | <b>5.00</b>   |
| <b>Log (Signal-BKG)</b>      |          | <b>1.13</b> | <b>1.93</b> | <b>2.26</b> | <b>2.77</b> | <b>3.11</b>  | <b>3.58</b>  | <b>3.75</b>   |
| Linear regression            | Slope    |             |             |             | Intercept   |              |              |               |
| log-log regression           | 0.11     |             |             |             | 0.00        |              |              |               |
|                              | 0.97     |             |             |             | -0.78       |              |              |               |
| <b>ICAM-2</b>                |          |             |             |             |             |              |              |               |
| <b>Concentration (pg/ml)</b> | <b>0</b> | <b>137</b>  | <b>412</b>  | <b>1235</b> | <b>3704</b> | <b>11111</b> | <b>33333</b> | <b>100000</b> |
| <b>Signal-BKG</b>            | <b>0</b> | <b>13</b>   | <b>42</b>   | <b>110</b>  | <b>334</b>  | <b>648</b>   | <b>1709</b>  | <b>3558</b>   |
| <b>Log (Concentration)</b>   |          | <b>2.14</b> | <b>2.61</b> | <b>3.09</b> | <b>3.57</b> | <b>4.05</b>  | <b>4.52</b>  | <b>5.00</b>   |
| <b>Log (Signal-BKG)</b>      |          | <b>1.11</b> | <b>1.63</b> | <b>2.04</b> | <b>2.52</b> | <b>2.81</b>  | <b>3.23</b>  | <b>3.55</b>   |
| Linear regression            | Slope    |             |             |             | Intercept   |              |              |               |
| log-log regression           | 0.04     |             |             |             | 0.00        |              |              |               |
|                              | 0.85     |             |             |             | -0.61       |              |              |               |
| <b>IL-13 R1</b>              |          |             |             |             |             |              |              |               |
| <b>Concentration (pg/ml)</b> | <b>0</b> | <b>14</b>   | <b>41</b>   | <b>123</b>  | <b>370</b>  | <b>1111</b>  | <b>3333</b>  | <b>10000</b>  |
| <b>Signal-BKG</b>            | <b>0</b> | <b>2</b>    | <b>9</b>    | <b>22</b>   | <b>32</b>   | <b>70</b>    | <b>309</b>   | <b>717</b>    |
| <b>Log (Concentration)</b>   |          | <b>1.14</b> | <b>1.61</b> | <b>2.09</b> | <b>2.57</b> | <b>3.05</b>  | <b>3.52</b>  | <b>4.00</b>   |
| <b>Log (Signal-BKG)</b>      |          | <b>0.38</b> | <b>0.96</b> | <b>1.34</b> | <b>1.51</b> | <b>1.85</b>  | <b>2.49</b>  | <b>2.86</b>   |
| Linear regression            | Slope    |             |             |             | Intercept   |              |              |               |
| log-log regression           | 0.07     |             |             |             | 0.00        |              |              |               |
|                              | 0.82     |             |             |             | -0.49       |              |              |               |
| <b>IL-13 R2</b>              |          |             |             |             |             |              |              |               |
| <b>Concentration (pg/ml)</b> | <b>0</b> | <b>27</b>   | <b>82</b>   | <b>247</b>  | <b>741</b>  | <b>2222</b>  | <b>6667</b>  | <b>20000</b>  |
| <b>Signal-BKG</b>            | <b>0</b> | <b>13</b>   | <b>30</b>   | <b>21</b>   | <b>41</b>   | <b>103</b>   | <b>373</b>   | <b>921</b>    |
| <b>Log (Concentration)</b>   |          | <b>1.44</b> | <b>1.92</b> | <b>2.39</b> | <b>2.87</b> | <b>3.35</b>  | <b>3.82</b>  | <b>4.30</b>   |
| <b>Log (Signal-BKG)</b>      |          |             | <b>1.33</b> | <b>1.61</b> | <b>2.01</b> | <b>2.57</b>  | <b>2.96</b>  |               |
| Linear regression            | Slope    |             |             |             | Intercept   |              |              |               |
| log-log regression           | 0.05     |             |             |             | 0.00        |              |              |               |
|                              | 0.89     |             |             |             | -0.87       |              |              |               |
| <b>IL-17B</b>                |          |             |             |             |             |              |              |               |
| <b>Concentration (pg/ml)</b> | <b>0</b> | <b>55</b>   | <b>165</b>  | <b>494</b>  | <b>1481</b> | <b>4444</b>  | <b>13333</b> | <b>40000</b>  |
| <b>Signal-BKG</b>            | <b>0</b> | <b>1</b>    | <b>8</b>    | <b>22</b>   | <b>44</b>   | <b>100</b>   | <b>283</b>   | <b>458</b>    |
| <b>Log (Concentration)</b>   |          | <b>1.74</b> | <b>2.22</b> | <b>2.69</b> | <b>3.17</b> | <b>3.65</b>  | <b>4.12</b>  | <b>4.60</b>   |
| <b>Log (Signal-BKG)</b>      |          |             | <b>0.90</b> | <b>1.33</b> | <b>1.64</b> | <b>2.00</b>  | <b>2.45</b>  | <b>2.66</b>   |
| Linear regression            | Slope    |             |             |             | Intercept   |              |              |               |
| log-log regression           | 0.02     |             |             |             | 0.00        |              |              |               |
|                              | 0.79     |             |             |             | -0.84       |              |              |               |
| <b>IL-2 Ra</b>               |          |             |             |             |             |              |              |               |
| <b>Concentration (pg/ml)</b> | <b>0</b> | <b>14</b>   | <b>41</b>   | <b>123</b>  | <b>370</b>  | <b>1111</b>  | <b>3333</b>  | <b>10000</b>  |
| <b>Signal-BKG</b>            | <b>0</b> | <b>21</b>   | <b>70</b>   | <b>183</b>  | <b>440</b>  | <b>1067</b>  | <b>3126</b>  | <b>5433</b>   |
| <b>Log (Concentration)</b>   |          | <b>1.14</b> | <b>1.61</b> | <b>2.09</b> | <b>2.57</b> | <b>3.05</b>  | <b>3.52</b>  | <b>4.00</b>   |
| <b>Log (Signal-BKG)</b>      |          | <b>1.33</b> | <b>1.84</b> | <b>2.26</b> | <b>2.64</b> | <b>3.03</b>  | <b>3.50</b>  | <b>3.74</b>   |
| Linear regression            | Slope    |             |             |             | Intercept   |              |              |               |
|                              | 0.94     |             |             |             | 0.00        |              |              |               |

|                       |       |      |      |      |      |           |       |        |
|-----------------------|-------|------|------|------|------|-----------|-------|--------|
| log-log regression    | 0.88  |      |      |      | 0.38 |           |       |        |
| <b>IL-2 Rb</b>        |       |      |      |      |      |           |       |        |
| Concentration (pg/ml) | 0     | 137  | 412  | 1235 | 3704 | 11111     | 33333 | 100000 |
| Signal-BKG            | 0     | 1    | 26   | 50   | 184  | 482       | 1185  | 1472   |
| Log (Concentration)   |       | 2.14 | 2.61 | 3.09 | 3.57 | 4.05      | 4.52  | 5.00   |
| Log (Signal-BKG)      |       |      | 1.42 | 1.70 | 2.26 | 2.68      | 3.07  | 3.17   |
| Linear regression     | Slope |      |      |      |      | Intercept |       |        |
| log-log regression    | 0.04  |      |      |      |      | 0.00      |       |        |
|                       | 0.90  |      |      |      |      | -0.99     |       |        |
| <b>IL-23</b>          |       |      |      |      |      |           |       |        |
| Concentration (pg/ml) | 0     | 55   | 165  | 494  | 1481 | 4444      | 13333 | 40000  |
| Signal-BKG            | 0     | 310  | 813  | 2198 | 5915 | 11503     | 20643 | 50557  |
| Log (Concentration)   |       | 1.74 | 2.22 | 2.69 | 3.17 | 3.65      | 4.12  | 4.60   |
| Log (Signal-BKG)      |       | 2.49 | 2.91 | 3.34 | 3.77 | 4.06      | 4.31  | 4.70   |
| Linear regression     | Slope |      |      |      |      | Intercept |       |        |
| log-log regression    | 1.31  |      |      |      |      | 0.00      |       |        |
|                       | 0.76  |      |      |      |      | 1.24      |       |        |
| <b>LAP</b>            |       |      |      |      |      |           |       |        |
| Concentration (pg/ml) | 0     | 5    | 16   | 49   | 148  | 444       | 1333  | 4000   |
| Signal-BKG            | 0     | 43   | 105  | 215  | 535  | 1516      | 5667  | 12621  |
| Log (Concentration)   |       | 0.74 | 1.22 | 1.69 | 2.17 | 2.65      | 3.12  | 3.60   |
| Log (Signal-BKG)      |       | 1.63 | 2.02 | 2.33 | 2.73 | 3.18      | 3.75  | 4.10   |
| Linear regression     | Slope |      |      |      |      | Intercept |       |        |
| log-log regression    | 3.27  |      |      |      |      | 0.00      |       |        |
|                       | 0.88  |      |      |      |      | 0.92      |       |        |
| <b>NrCAM</b>          |       |      |      |      |      |           |       |        |
| Concentration (pg/ml) | 0     | 27   | 82   | 247  | 741  | 2222      | 6667  | 20000  |
| Signal-BKG            | 0     | 10   | 56   | 113  | 317  | 682       | 2222  | 3397   |
| Log (Concentration)   |       | 1.44 | 1.92 | 2.39 | 2.87 | 3.35      | 3.82  | 4.30   |
| Log (Signal-BKG)      |       | 1.02 | 1.75 | 2.05 | 2.50 | 2.83      | 3.35  | 3.53   |
| Linear regression     | Slope |      |      |      |      | Intercept |       |        |
| log-log regression    | 0.33  |      |      |      |      | 0.00      |       |        |
|                       | 0.92  |      |      |      |      | -0.17     |       |        |
| <b>PAI-I</b>          |       |      |      |      |      |           |       |        |
| Concentration (pg/ml) | 0     | 55   | 165  | 494  | 1481 | 4444      | 13333 | 40000  |
| Signal-BKG            | 0     | 24   | 68   | 163  | 577  | 995       | 1678  | 2077   |
| Log (Concentration)   |       | 1.74 | 2.22 | 2.69 | 3.17 | 3.65      | 4.12  | 4.60   |
| Log (Signal-BKG)      |       | 1.38 | 1.83 | 2.21 | 2.76 | 3.00      | 3.22  | 3.32   |
| Linear regression     | Slope |      |      |      |      | Intercept |       |        |
| log-log regression    | 0.24  |      |      |      |      | 0.00      |       |        |
|                       | 0.87  |      |      |      |      | -0.11     |       |        |
| <b>PDGF-AB</b>        |       |      |      |      |      |           |       |        |
| Concentration (pg/ml) | 0     | 14   | 41   | 123  | 370  | 1111      | 3333  | 10000  |
| Signal-BKG            | 0     | 7    | 22   | 43   | 154  | 362       | 1546  | 3022   |
| Log (Concentration)   |       | 1.14 | 1.61 | 2.09 | 2.57 | 3.05      | 3.52  | 4.00   |
| Log (Signal-BKG)      |       | 0.83 | 1.35 | 1.63 | 2.19 | 2.56      | 3.19  | 3.48   |
| Linear regression     | Slope |      |      |      |      | Intercept |       |        |
| log-log regression    | 0.32  |      |      |      |      | 0.00      |       |        |
|                       | 0.94  |      |      |      |      | -0.24     |       |        |
| <b>Resistin</b>       |       |      |      |      |      |           |       |        |
| Concentration (pg/ml) | 0     | 27   | 82   | 247  | 741  | 2222      | 6667  | 20000  |
| Signal-BKG            | 0     | 95   | 609  | 1917 | 5838 | 11095     | 19273 | 16719  |
| Log (Concentration)   |       | 1.44 | 1.92 | 2.39 | 2.87 | 3.35      | 3.82  | 4.30   |
| Log (Signal-BKG)      |       |      | 2.78 | 3.28 | 3.77 | 4.05      | 4.28  | 4.22   |
| Linear regression     | Slope |      |      |      |      | Intercept |       |        |
| log-log regression    | 3.16  |      |      |      |      | 0.00      |       |        |
|                       | 0.79  |      |      |      |      | 1.37      |       |        |
| <b>SDF-1b</b>         |       |      |      |      |      |           |       |        |
| Concentration (pg/ml) | 0     | 55   | 165  | 494  | 1481 | 4444      | 13333 | 40000  |
| Signal-BKG            | 5     | 1    | 4    | 6    | 21   | 67        | 137   | 584    |
| Log (Concentration)   |       | 1.74 | 2.22 | 2.69 | 3.17 | 3.65      | 4.12  | 4.60   |
| Log (Signal-BKG)      |       | 0.00 | 0.61 | 0.75 | 1.32 | 1.83      | 2.14  | 2.77   |
|                       | Slope |      |      |      |      | Intercept |       |        |

|                       |       |      |      |      |           |       |       |        |
|-----------------------|-------|------|------|------|-----------|-------|-------|--------|
| Linear regression     | 0.01  |      |      |      | 0.00      |       |       |        |
| log-log regression    | 0.93  |      |      |      | -1.61     |       |       |        |
| <b>sgp130</b>         |       |      |      |      |           |       |       |        |
| Concentration (pg/ml) | 0     | 110  | 329  | 988  | 2963      | 8889  | 26667 | 80000  |
| Signal-BKG            | 0     | 25   | 70   | 132  | 285       | 557   | 1199  | 1638   |
| Log (Concentration)   |       | 2.04 | 2.52 | 2.99 | 3.47      | 3.95  | 4.43  | 4.90   |
| Log (Signal-BKG)      |       | 1.40 | 1.84 | 2.12 | 2.46      | 2.75  | 3.08  | 3.21   |
| Linear regression     | Slope |      |      |      | Intercept |       |       |        |
| log-log regression    | 0.05  |      |      |      | 0.00      |       |       |        |
|                       | 0.69  |      |      |      | 0.06      |       |       |        |
| <b>Shh N</b>          |       |      |      |      |           |       |       |        |
| Concentration (pg/ml) | 0     | 55   | 165  | 494  | 1481      | 4444  | 13333 | 40000  |
| Signal-BKG            | 0     | 9    | 35   | 90   | 251       | 919   | 3435  | 5450   |
| Log (Concentration)   |       | 1.74 | 2.22 | 2.69 | 3.17      | 3.65  | 4.12  | 4.60   |
| Log (Signal-BKG)      |       | 0.96 | 1.54 | 1.95 | 2.40      | 2.96  | 3.54  | 3.74   |
| Linear regression     | Slope |      |      |      | Intercept |       |       |        |
| log-log regression    | 0.25  |      |      |      | 0.00      |       |       |        |
|                       | 1.05  |      |      |      | -0.87     |       |       |        |
| <b>Siglec-5</b>       |       |      |      |      |           |       |       |        |
| Concentration (pg/ml) | 0     | 14   | 41   | 123  | 370       | 1111  | 3333  | 10000  |
| Signal-BKG            | 0     | 33   | 92   | 210  | 532       | 1669  | 4921  | 14138  |
| Log (Concentration)   |       | 1.14 | 1.61 | 2.09 | 2.57      | 3.05  | 3.52  | 4.00   |
| Log (Signal-BKG)      |       | 1.52 | 1.96 | 2.32 | 2.73      | 3.22  | 3.69  | 4.15   |
| Linear regression     | Slope |      |      |      | Intercept |       |       |        |
| log-log regression    | 1.42  |      |      |      | 0.00      |       |       |        |
|                       | 0.92  |      |      |      | 0.44      |       |       |        |
| <b>ST2</b>            |       |      |      |      |           |       |       |        |
| Concentration (pg/ml) | 0     | 5    | 16   | 49   | 148       | 444   | 1333  | 4000   |
| Signal-BKG            | 0     | 18   | 31   | 84   | 214       | 492   | 1390  | 2920   |
| Log (Concentration)   |       | 0.74 | 1.22 | 1.69 | 2.17      | 2.65  | 3.12  | 3.60   |
| Log (Signal-BKG)      |       | 1.25 | 1.49 | 1.93 | 2.33      | 2.69  | 3.14  | 3.47   |
| Linear regression     | Slope |      |      |      | Intercept |       |       |        |
| log-log regression    | 0.77  |      |      |      | 0.00      |       |       |        |
|                       | 0.80  |      |      |      | 0.59      |       |       |        |
| <b>TGF-b2</b>         |       |      |      |      |           |       |       |        |
| Concentration (pg/ml) | 0     | 55   | 165  | 494  | 1481      | 4444  | 13333 | 40000  |
| Signal-BKG            | 8     | 1    | 14   | 31   | 55        | 167   | 710   | 1302   |
| Log (Concentration)   |       | 1.74 | 2.22 | 2.69 | 3.17      | 3.65  | 4.12  | 4.60   |
| Log (Signal-BKG)      |       |      | 1.13 | 1.49 | 1.74      | 2.22  | 2.85  | 3.11   |
| Linear regression     | Slope |      |      |      | Intercept |       |       |        |
| log-log regression    | 0.03  |      |      |      | 0.00      |       |       |        |
|                       | 0.87  |      |      |      | -0.87     |       |       |        |
| <b>Tie-2</b>          |       |      |      |      |           |       |       |        |
| Concentration (pg/ml) | 0     | 14   | 41   | 123  | 370       | 1111  | 3333  | 10000  |
| Signal-BKG            | 0     | 11   | 25   | 36   | 96        | 302   | 1172  | 2650   |
| Log (Concentration)   |       | 1.14 | 1.61 | 2.09 | 2.57      | 3.05  | 3.52  | 4.00   |
| Log (Signal-BKG)      |       | 1.03 | 1.39 | 1.55 | 1.98      | 2.48  | 3.07  | 3.42   |
| Linear regression     | Slope |      |      |      | Intercept |       |       |        |
| log-log regression    | 0.27  |      |      |      | 0.00      |       |       |        |
|                       | 0.86  |      |      |      | -0.07     |       |       |        |
| <b>TPO</b>            |       |      |      |      |           |       |       |        |
| Concentration (pg/ml) | 0     | 274  | 823  | 2469 | 7407      | 22222 | 66667 | 200000 |
| Signal-BKG            | 0     | 4    | 8    | 22   | 70        | 515   | 2859  | 7174   |
| Log (Concentration)   |       | 2.44 | 2.92 | 3.39 | 3.87      | 4.35  | 4.82  | 5.30   |
| Log (Signal-BKG)      |       |      | 0.92 | 1.34 | 1.84      | 2.71  | 3.46  | 3.86   |
| Linear regression     | Slope |      |      |      | Intercept |       |       |        |
| log-log regression    | 0.04  |      |      |      | 0.00      |       |       |        |
|                       | 1.31  |      |      |      | -3.04     |       |       |        |
| <b>TRAIL-R4</b>       |       |      |      |      |           |       |       |        |
| Concentration (pg/ml) | 0     | 11   | 33   | 99   | 296       | 889   | 2667  | 8000   |
| Signal-BKG            | 0     | 10   | 22   | 59   | 153       | 355   | 1225  | 2489   |
| Log (Concentration)   |       | 1.04 | 1.52 | 1.99 | 2.47      | 2.95  | 3.43  | 3.90   |
| Log (Signal-BKG)      |       | 0.99 | 1.34 | 1.77 | 2.19      | 2.55  | 3.09  | 3.40   |

|                              |          |             |             |             |             |             |              |              |           |
|------------------------------|----------|-------------|-------------|-------------|-------------|-------------|--------------|--------------|-----------|
| Linear regression            | Slope    |             |             |             |             |             |              |              | Intercept |
| log-log regression           | 0.33     |             |             |             |             |             |              |              | 0.00      |
|                              | 0.86     |             |             |             |             |             |              |              | 0.06      |
| <b>TREM-1</b>                |          |             |             |             |             |             |              |              |           |
| <b>Concentration (pg/ml)</b> | <b>0</b> | <b>27</b>   | <b>82</b>   | <b>247</b>  | <b>741</b>  | <b>2222</b> | <b>6667</b>  | <b>20000</b> |           |
| <b>Signal-BKG</b>            | <b>0</b> | <b>36</b>   | <b>107</b>  | <b>249</b>  | <b>591</b>  | <b>1217</b> | <b>3267</b>  | <b>5328</b>  |           |
| <b>Log (Concentration)</b>   |          | <b>1.44</b> | <b>1.92</b> | <b>2.39</b> | <b>2.87</b> | <b>3.35</b> | <b>3.82</b>  | <b>4.30</b>  |           |
| <b>Log (Signal-BKG)</b>      |          | <b>1.55</b> | <b>2.03</b> | <b>2.40</b> | <b>2.77</b> | <b>3.09</b> | <b>3.51</b>  | <b>3.73</b>  |           |
| Linear regression            | Slope    |             |             |             |             |             |              |              | Intercept |
| log-log regression           | 0.50     |             |             |             |             |             |              |              | 0.00      |
|                              | 0.80     |             |             |             |             |             |              |              | 0.46      |
| <b>VEGF-C</b>                |          |             |             |             |             |             |              |              |           |
| <b>Concentration (pg/ml)</b> | <b>0</b> | <b>27</b>   | <b>82</b>   | <b>247</b>  | <b>741</b>  | <b>2222</b> | <b>6667</b>  | <b>20000</b> |           |
| <b>Signal-BKG</b>            | <b>0</b> | <b>5</b>    | <b>25</b>   | <b>87</b>   | <b>397</b>  | <b>976</b>  | <b>2124</b>  | <b>2582</b>  |           |
| <b>Log (Concentration)</b>   |          | <b>1.44</b> | <b>1.92</b> | <b>2.39</b> | <b>2.87</b> | <b>3.35</b> | <b>3.82</b>  | <b>4.30</b>  |           |
| <b>Log (Signal-BKG)</b>      |          | <b>0.72</b> | <b>1.40</b> | <b>1.94</b> | <b>2.60</b> | <b>2.99</b> | <b>3.33</b>  | <b>3.41</b>  |           |
| Linear regression            | Slope    |             |             |             |             |             |              |              | Intercept |
| log-log regression           | 0.45     |             |             |             |             |             |              |              | 0.00      |
|                              | 1.20     |             |             |             |             |             |              |              | -0.95     |
| <b>VEGF R1</b>               |          |             |             |             |             |             |              |              |           |
| <b>Concentration (pg/ml)</b> | <b>0</b> | <b>55</b>   | <b>165</b>  | <b>494</b>  | <b>1481</b> | <b>4444</b> | <b>13333</b> | <b>40000</b> |           |
| <b>Signal-BKG</b>            | <b>0</b> | <b>4</b>    | <b>8</b>    | <b>26</b>   | <b>81</b>   | <b>198</b>  | <b>589</b>   | <b>1414</b>  |           |
| <b>Log (Concentration)</b>   |          | <b>1.74</b> | <b>2.22</b> | <b>2.69</b> | <b>3.17</b> | <b>3.65</b> | <b>4.12</b>  | <b>4.60</b>  |           |
| <b>Log (Signal-BKG)</b>      |          | <b>0.63</b> | <b>0.88</b> | <b>1.42</b> | <b>1.91</b> | <b>2.30</b> | <b>2.77</b>  | <b>3.15</b>  |           |
| Linear regression            | Slope    |             |             |             |             |             |              |              | Intercept |
| log-log regression           | 0.04     |             |             |             |             |             |              |              | 0.00      |
|                              | 0.91     |             |             |             |             |             |              |              | -1.03     |



**Supplemental Table 4. Quantitative results for individual patients pre-Retisert.** Cytokines concentrations are listed in pg/ml.

| Stage     | Control (ERM/Mac Hole) |          |          |          | NIV      |          |          |          |          |          |          |          | QC    |           |
|-----------|------------------------|----------|----------|----------|----------|----------|----------|----------|----------|----------|----------|----------|-------|-----------|
| Patient   | 1                      | 2        | 3        | 4        | 5        | 6        | 7        | 8        | 9        | 10       | 11       | 12       | LOD   | MAX       |
| BLC       | 51.71                  | 13.67    | 14.89    | 32.24    | 29.87    | 22.94    | 79.73    | 113.03   | 705.10   | 14.37    | 2971.28  | 7465.95  | 17.73 | 3000.00   |
| Eotaxin   | 0.00                   | 0.00     | 6.96     | 13.97    | 0.00     | 0.00     | 0.00     | 0.00     | 15.33    | 0.00     | 15.38    | 41.10    | 13.06 | 6000.00   |
| Eotaxin-2 | 17.15                  | 7.69     | 55.34    | 14.14    | 17.79    | 5.14     | 42.20    | 31.80    | 212.78   | 13.47    | 187.29   | 220.24   | 4.69  | 1500.00   |
| G-CSF     | 0.00                   | 0.00     | 0.00     | 0.00     | 91.70    | 0.00     | 0.00     | 0.00     | 173.38   | 0.00     | 181.36   | 25.07    | 22.54 | 30000.00  |
| GM-CSF    | 0.00                   | 0.00     | 0.00     | 0.00     | 0.00     | 0.00     | 0.00     | 0.00     | 0.00     | 0.00     | 0.00     | 0.00     | 4.32  | 1500.00   |
| I-309     | 0.00                   | 0.00     | 0.00     | 0.00     | 6.31     | 0.00     | 0.00     | 0.00     | 12.02    | 0.00     | 0.00     | 0.00     | 11.34 | 6000.00   |
| ICAM-1    | 2789.57                | 802.04   | 2146.05  | 1851.97  | 6419.18  | 3054.08  | 5560.33  | 7215.14  | 9307.76  | 4532.59  | 8696.62  | 4728.25  | 78.00 | 150000.00 |
| IFNg      | 0.00                   | 0.00     | 0.00     | 0.00     | 0.00     | 0.00     | 0.00     | 0.00     | 0.00     | 0.00     | 0.00     | 0.00     | 16.12 | 3000.00   |
| IL-1a     | 5.95                   | 0.00     | 0.00     | 0.00     | 0.00     | 6.15     | 6.81     | 7.80     | 6.92     | 0.00     | 6.59     | 0.00     | 11.51 | 3000.00   |
| IL-1b     | 0.00                   | 0.00     | 0.00     | 0.00     | 0.00     | 0.00     | 0.00     | 0.00     | 0.00     | 0.00     | 0.00     | 0.00     | 1.84  | 1500.00   |
| IL-1ra    | 4.99                   | 9.27     | 0.00     | 4.64     | 0.00     | 423.58   | 27.54    | 14.63    | 79.83    | 81.22    | 24.17    | 4.86     | 7.00  | 3000.00   |
| IL-2      | 0.00                   | 0.00     | 0.00     | 0.00     | 0.00     | 0.00     | 0.00     | 0.00     | 0.00     | 0.00     | 0.00     | 0.00     | 20.81 | 3000.00   |
| IL-4      | 0.00                   | 0.00     | 0.00     | 0.00     | 0.00     | 0.00     | 0.00     | 0.00     | 0.00     | 0.00     | 0.00     | 0.00     | 9.85  | 3000.00   |
| IL-5      | 0.00                   | 0.00     | 0.00     | 0.00     | 0.00     | 0.00     | 0.00     | 0.00     | 0.00     | 0.00     | 0.00     | 0.00     | 26.68 | 6000.00   |
| IL-6      | 0.00                   | 12.01    | 7.48     | 11.97    | 810.76   | 31.88    | 99.46    | 149.13   | 1443.55  | 42.46    | 154.60   | 307.79   | 13.95 | 3000.00   |
| IL-6sR    | 15.37                  | 0.00     | 13.04    | 10.41    | 87.93    | 61.14    | 138.45   | 388.45   | 432.78   | 184.93   | 821.88   | 157.73   | 11.00 | 15000.00  |
| IL-7      | 0.00                   | 0.00     | 14.80    | 0.00     | 35.58    | 0.00     | 0.00     | 19.17    | 0.00     | 0.00     | 0.00     | 0.00     | 20.42 | 6000.00   |
| IL-8      | 3.80                   | 3.09     | 0.00     | 7.85     | 10.17    | 6.78     | 21.29    | 43.99    | 240.21   | 3.26     | 37.18    | 38.04    | 3.63  | 750.00    |
| IL-10     | 0.00                   | 0.00     | 0.00     | 0.00     | 0.00     | 0.00     | 0.00     | 0.00     | 0.00     | 0.00     | 0.00     | 0.00     | 7.66  | 6000.00   |
| IL-11     | 0.00                   | 0.00     | 0.00     | 0.00     | 0.00     | 0.00     | 0.00     | 0.00     | 0.00     | 0.00     | 0.00     | 0.00     | 64.81 | 30000.00  |
| IL-12p40  | 0.00                   | 0.00     | 0.00     | 12.75    | 30.16    | 0.00     | 11.61    | 23.67    | 50.58    | 12.41    | 20.55    | 29.90    | 18.76 | 15000.00  |
| IL-12p70  | 0.00                   | 0.00     | 0.00     | 0.00     | 0.00     | 0.00     | 0.00     | 0.00     | 0.00     | 0.00     | 0.00     | 0.00     | 2.01  | 750.00    |
| IL-13     | 0.00                   | 0.00     | 0.00     | 0.00     | 0.00     | 0.00     | 0.00     | 0.00     | 0.00     | 0.00     | 0.00     | 0.00     | 3.57  | 1500.00   |
| IL-15     | 27.14                  | 17.26    | 17.73    | 83.82    | 0.00     | 48.80    | 46.70    | 19.89    | 61.43    | 0.00     | 38.31    | 21.98    | 19.00 | 6000.00   |
| IL-16     | 18.62                  | 0.00     | 0.00     | 20.02    | 16.17    | 12.73    | 0.00     | 16.96    | 49.25    | 0.00     | 22.13    | 0.00     | 24.60 | 7500.00   |
| IL-17     | 0.00                   | 0.00     | 0.00     | 0.00     | 0.00     | 0.00     | 0.00     | 0.00     | 0.00     | 0.00     | 0.00     | 0.00     | 20.05 | 6000.00   |
| MCP-1     | 3739.44                | 2267.24  | 3236.37  | 3121.99  | 2028.19  | 1711.99  | 3341.02  | 3962.44  | 4648.84  | 2263.56  | 3821.56  | 4214.09  | 83.47 | 15000.00  |
| MCSF      | 0.00                   | 0.00     | 0.00     | 0.00     | 0.00     | 0.00     | 0.00     | 0.00     | 0.00     | 0.00     | 0.00     | 0.00     | 6.92  | 6000.00   |
| MIG       | 508.04                 | 167.65   | 400.50   | 1784.42  | 423.27   | 78.15    | 259.40   | 1022.60  | 984.34   | 116.92   | 1616.86  | 3400.04  | 35.00 | 7500.00   |
| MIP-1a    | 0.00                   | 0.00     | 0.00     | 65.23    | 0.00     | 84.93    | 58.44    | 53.79    | 145.06   | 0.00     | 132.73   | 174.62   | 72.30 | 15000.00  |
| MIP-1b    | 23.20                  | 9.30     | 14.11    | 16.94    | 16.45    | 9.29     | 23.97    | 53.08    | 178.08   | 10.31    | 99.70    | 178.03   | 13.62 | 6000.00   |
| MIP-1d    | 97.68                  | 9.49     | 89.45    | 324.85   | 343.74   | 62.67    | 278.40   | 489.75   | 1011.44  | 427.30   | 902.46   | 571.33   | 7.77  | 15000.00  |
| PDGF-BB   | 0.00                   | 0.00     | 0.00     | 0.00     | 15.97    | 3.48     | 5.60     | 11.99    | 25.16    | 3.12     | 3.82     | 18.53    | 3.16  | 3000.00   |
| RANTES    | 0.00                   | 0.00     | 0.00     | 0.00     | 0.00     | 0.00     | 0.00     | 0.00     | 366.81   | 0.00     | 0.00     | 0.00     | 88.00 | 30000.00  |
| TIMP-1    | 12456.30               | 10137.88 | 9610.70  | 10970.56 | 10563.48 | 17616.62 | 16677.11 | 16079.49 | 16229.83 | 15111.46 | 16999.88 | 13236.84 | 17.21 | 60000.00  |
| TIMP-2    | 13353.26               | 11026.06 | 13263.49 | 15039.36 | 15238.15 | 19387.23 | 18755.88 | 17694.65 | 14734.38 | 18241.27 | 22263.10 | 15018.31 | 56.99 | 60000.00  |
| TNFa      | 0.00                   | 0.00     | 0.00     | 0.00     | 0.00     | 0.00     | 0.00     | 0.00     | 0.00     | 0.00     | 0.00     | 0.00     | 14.39 | 3000.00   |

|                |          |          |          |          |          |          |          |          |           |          |          |          |         |           |
|----------------|----------|----------|----------|----------|----------|----------|----------|----------|-----------|----------|----------|----------|---------|-----------|
| <b>TNFb</b>    | 0.00     | 0.00     | 0.00     | 0.00     | 0.00     | 0.00     | 0.00     | 0.00     | 0.00      | 0.00     | 0.00     | 0.00     | 28.59   | 30000.00  |
| <b>TNF RI</b>  | 1223.02  | 712.00   | 1382.57  | 1190.55  | 3867.38  | 1292.95  | 1636.10  | 2939.34  | 5124.63   | 1824.54  | 4820.00  | 4098.77  | 40.35   | 60000.00  |
| <b>TNF RII</b> | 161.90   | 51.23    | 117.90   | 89.98    | 1351.10  | 194.22   | 586.90   | 1462.24  | 2385.78   | 440.78   | 1715.48  | 962.77   | 20.21   | 60000.00  |
| <b>AR</b>      | 0.00     | 0.00     | 0.00     | 27.16    | 0.00     | 0.00     | 0.00     | 0.00     | 0.00      | 0.00     | 0.00     | 0.00     | 50.63   | 15000.00  |
| <b>BDNF</b>    | 0.00     | 0.00     | 0.00     | 0.00     | 0.00     | 0.00     | 0.00     | 0.00     | 0.00      | 0.00     | 0.00     | 0.00     | 13.68   | 3000.00   |
| <b>bFGF</b>    | 105.57   | 119.85   | 0.00     | 0.00     | 0.00     | 208.99   | 0.00     | 106.23   | 120.25    | 196.19   | 112.72   | 0.00     | 121.00  | 30000.00  |
| <b>BMP-4</b>   | 0.00     | 0.00     | 0.00     | 0.00     | 0.00     | 0.00     | 0.00     | 0.00     | 174.92    | 0.00     | 127.45   | 407.38   | 181.13  | 150000.00 |
| <b>BMP-5</b>   | 7410.16  | 15835.38 | 8730.3   | 3882.13  | 1337.27  | 3120.31  | 0.00     | 3423.09  | 3538.83   | 3076.05  | 7739.52  | 3209.34  | 1620.00 | 150000.00 |
| <b>BMP-7</b>   | 5213.11  | 3530.90  | 1013.44  | 4330.78  | 1062.63  | 900.76   | 0.00     | 964.10   | 2333.28   | 1476.75  | 3993.94  | 1471.22  | 1366.13 | 60000.00  |
| <b>b-NGF</b>   | 0.00     | 0.00     | 0.00     | 0.00     | 0.00     | 0.00     | 0.00     | 0.00     | 0.00      | 0.00     | 0.00     | 0.00     | 14.93   | 15000.00  |
| <b>EGF</b>     | 1.22     | 0.00     | 0.00     | 0.83     | 0.00     | 0.00     | 0.00     | 0.00     | 2.56      | 0.61     | 0.00     | 1.43     | 1.04    | 300.00    |
| <b>EGF R</b>   | 1718.43  | 760.89   | 1260.80  | 1134.39  | 3044.10  | 1663.59  | 1821.05  | 3305.00  | 3096.08   | 2788.73  | 3494.02  | 2166.17  | 26.47   | 15000.00  |
| <b>EG-VEGF</b> | 53.86    | 0.00     | 0.00     | 37.90    | 0.00     | 0.00     | 0.00     | 0.00     | 0.00      | 0.00     | 0.00     | 0.00     | 55.17   | 15000.00  |
| <b>FGF-4</b>   | 1481.07  | 408.92   | 0.00     | 950.60   | 0.00     | 0.00     | 0.00     | 479.16   | 531.47    | 428.07   | 0.00     | 503.37   | 740.41  | 150000.00 |
| <b>FGF-7</b>   | 0.00     | 0.00     | 0.00     | 0.00     | 0.00     | 0.00     | 0.00     | 0.00     | 39.63     | 0.00     | 16.24    | 54.47    | 23.14   | 15000.00  |
| <b>GDF-15</b>  | 572.88   | 85.36    | 244.45   | 526.56   | 857.98   | 278.40   | 532.16   | 950.20   | 941.01    | 569.67   | 1144.26  | 955.79   | 3.40    | 3000.00   |
| <b>GDNF</b>    | 42.63    | 0.00     | 0.00     | 22.32    | 0.00     | 0.00     | 0.00     | 29.29    | 0.00      | 46.82    | 23.75    | 0.00     | 38.63   | 6000.00   |
| <b>GH</b>      | 0.00     | 0.00     | 26.57    | 28.97    | 0.00     | 0.00     | 0.00     | 0.00     | 0.00      | 0.00     | 0.00     | 0.00     | 51.01   | 15000.00  |
| <b>HB-EGF</b>  | 0.00     | 0.00     | 0.00     | 0.00     | 0.00     | 0.00     | 0.00     | 0.00     | 0.00      | 0.00     | 0.00     | 0.00     | 29.54   | 15000.00  |
| <b>HGF</b>     | 5864.14  | 3502.80  | 6140.94  | 5861.09  | 18405.86 | 5232.60  | 6262.72  | 20650.13 | 9885.16   | 9360.16  | 2300.61  | 4508.58  | 19.01   | 6000.00   |
| <b>IGFBP-1</b> | 194.18   | 93.94    | 161.56   | 1354.68  | 1719.93  | 137.15   | 149.96   | 165.64   | 3652.24   | 1275.08  | 1703.98  | 2596.85  | 26.59   | 7500.00   |
| <b>IGFBP-2</b> | 9975.16  | 11490.25 | 8133.68  | 10477.45 | 12080.37 | 11924.11 | 11445.95 | 19255.53 | 14212.53  | 14290.79 | 18979.65 | 12808.24 | 141.15  | 30000.00  |
| <b>IGFBP-3</b> | 5899.53  | 816.27   | 3984.33  | 8415.69  | 11278.91 | 1528.11  | 3064.54  | 14541.12 | 145109.20 | 6187.55  | 36893.82 | 63106.17 | 947.11  | 300000.00 |
| <b>IGFBP-4</b> | 18482.93 | 4683.38  | 3505.95  | 5616.64  | 7185.41  | 964.00   | 890.18   | 11095.79 | 13409.57  | 2288.43  | 3726.23  | 8217.37  | 1127.42 | 300000.00 |
| <b>IGFBP-6</b> | 60813.30 | 78191.58 | 55545.76 | 51258.65 | 48994.24 | 23409.25 | 21777.96 | 50815.71 | 52822.37  | 28175.82 | 77101.76 | 64931.85 | 414.82  | 150000.00 |
| <b>IGF-I</b>   | 0.00     | 0.00     | 0.00     | 108.34   | 0.00     | 0.00     | 0.00     | 548.01   | 62.63     | 222.11   | 203.13   | 0.00     | 123.00  | 30000.00  |
| <b>Insulin</b> | 994.92   | 298.75   | 694.13   | 675.47   | 997.36   | 570.62   | 0.00     | 1040.95  | 1076.64   | 299.23   | 881.80   | 59.74    | 112.00  | 30000.00  |
| <b>MCF R</b>   | 3474.12  | 1498.35  | 3303.14  | 3709.03  | 13132.34 | 4358.33  | 8954.96  | 25562.36 | 22322.23  | 10397.18 | 29090.23 | 16248.24 | 58.83   | 60000.00  |
| <b>NGF R</b>   | 107.98   | 25.38    | 93.33    | 80.41    | 254.63   | 125.52   | 92.59    | 254.11   | 279.07    | 194.29   | 223.34   | 206.41   | 40.18   | 15000.00  |
| <b>NT-3</b>    | 0.00     | 0.00     | 0.00     | 72.19    | 64.80    | 0.00     | 0.00     | 0.00     | 84.36     | 0.00     | 0.00     | 74.72    | 128.69  | 60000.00  |
| <b>NT-4</b>    | 78.57    | 0.00     | 0.00     | 18.94    | 0.00     | 0.00     | 0.00     | 33.56    | 64.11     | 0.00     | 32.55    | 20.80    | 34.75   | 15000.00  |
| <b>OPG</b>     | 1808.48  | 798.09   | 2481.61  | 2888.00  | 4662.12  | 2289.34  | 2360.25  | 3102.64  | 4242.43   | 2433.91  | 3036.96  | 4084.39  | 13.38   | 6000.00   |
| <b>PDGF-AA</b> | 228.23   | 88.70    | 440.19   | 370.77   | 1214.43  | 288.40   | 349.34   | 1709.08  | 912.62    | 371.50   | 89.23    | 865.45   | 14.69   | 15000.00  |
| <b>PIGF</b>    | 0.00     | 0.00     | 0.00     | 3.52     | 0.00     | 8.00     | 0.00     | 5.44     | 100.64    | 8.17     | 8.82     | 32.80    | 6.76    | 6000.00   |
| <b>SCF</b>     | 0.00     | 0.00     | 0.00     | 0.00     | 0.00     | 0.00     | 0.00     | 0.00     | 8.93      | 0.00     | 9.49     | 0.00     | 12.02   | 15000.00  |
| <b>SCF R</b>   | 873.21   | 135.68   | 887.68   | 949.79   | 2122.60  | 420.41   | 749.42   | 3495.58  | 10803.96  | 1773.09  | 8460.17  | 5430.87  | 95.84   | 30000.00  |
| <b>TGFa</b>    | 15.21    | 0.00     | 16.87    | 45.15    | 0.00     | 0.00     | 0.00     | 0.00     | 29.60     | 0.00     | 31.58    | 32.46    | 19.56   | 15000.00  |
| <b>TGFb1</b>   | 4239.95  | 0.00     | 2245.55  | 2963.00  | 2431.76  | 0.00     | 0.00     | 1952.59  | 1974.54   | 1337.88  | 835.45   | 891.34   | 1163.12 | 150000.00 |

|                     |         |          |          |          |          |          |          |          |          |          |          |          |         |           |
|---------------------|---------|----------|----------|----------|----------|----------|----------|----------|----------|----------|----------|----------|---------|-----------|
| <b>TGFb3</b>        | 0.00    | 0.00     | 0.00     | 0.00     | 0.00     | 0.00     | 0.00     | 0.00     | 0.00     | 0.00     | 0.00     | 0.00     | 137.80  | 60000.00  |
| <b>VEGF</b>         | 41.67   | 0.00     | 0.00     | 481.21   | 29.31    | 82.91    | 37.92    | 71.35    | 9268.50  | 255.40   | 93.27    | 3011.90  | 43.83   | 15000.00  |
| <b>VEGF R2</b>      | 4627.73 | 889.92   | 2875.98  | 2684.11  | 5085.60  | 2847.57  | 1976.98  | 4905.08  | 1836.68  | 3477.09  | 916.40   | 1260.48  | 27.44   | 15000.00  |
| <b>VEGF R3</b>      | 0.00    | 0.00     | 0.00     | 0.00     | 0.00     | 0.00     | 0.00     | 0.00     | 0.00     | 0.00     | 92.48    | 82.54    | 94.73   | 60000.00  |
| <b>VEGF-D</b>       | 0.00    | 0.00     | 0.00     | 0.00     | 0.00     | 0.00     | 0.00     | 0.00     | 0.00     | 0.00     | 0.00     | 0.00     | 48.08   | 30000.00  |
| <b>6Ckine</b>       | 0.00    | 590.95   | 705.15   | 1242.03  | 713.33   | 213.44   | 0.00     | 587.21   | 550.79   | 262.93   | 445.53   | 723.53   | 403.78  | 60000.00  |
| <b>Axl</b>          | 0.00    | 0.00     | 14.46    | 56.86    | 40.00    | 130.76   | 119.05   | 191.50   | 86.42    | 199.45   | 149.48   | 20.50    | 19.14   | 6000.00   |
| <b>BTC</b>          | 724.47  | 619.26   | 2549.19  | 4993.43  | 931.73   | 6827.14  | 3305.92  | 4975.93  | 1542.63  | 4660.58  | 6298.39  | 2965.11  | 1235.00 | 150000.00 |
| <b>CCL28</b>        | 0.00    | 0.00     | 207.00   | 841.34   | 202.61   | 0.00     | 0.00     | 0.00     | 0.00     | 0.00     | 0.00     | 0.00     | 217.07  | 60000.00  |
| <b>CTACK</b>        | 0.00    | 0.00     | 0.00     | 253.68   | 0.00     | 0.00     | 0.00     | 0.00     | 117.42   | 0.00     | 263.19   | 147.95   | 183.60  | 75000.00  |
| <b>CXCL16</b>       | 5695.09 | 7333.95  | 11373.22 | 9039.06  | 11417.18 | 15094.77 | 12359.94 | 16358.44 | 17210.86 | 14584.99 | 15975.64 | 14166.28 | 80.42   | 30000.00  |
| <b>ENA-78</b>       | 0.00    | 0.00     | 57.46    | 133.76   | 96.53    | 0.00     | 0.00     | 42.45    | 190.49   | 0.00     | 69.25    | 65.16    | 71.91   | 15000.00  |
| <b>Eotaxin-3</b>    | 0.00    | 0.00     | 60.40    | 303.03   | 0.00     | 219.91   | 91.81    | 191.37   | 90.86    | 396.31   | 112.32   | 1046.32  | 115.48  | 30000.00  |
| <b>GCP-2</b>        | 0.00    | 0.00     | 0.00     | 71.97    | 21.52    | 0.00     | 0.00     | 0.00     | 168.07   | 0.00     | 0.00     | 0.00     | 30.63   | 15000.00  |
| <b>GRO</b>          | 54.28   | 101.46   | 162.31   | 295.32   | 97.85    | 145.45   | 62.89    | 33.03    | 819.68   | 69.64    | 103.93   | 310.81   | 14.83   | 1500.00   |
| <b>HCC-1</b>        | 724.86  | 542.98   | 1483.30  | 1528.03  | 1381.85  | 1232.76  | 1696.47  | 2019.80  | 1913.70  | 2170.39  | 1757.08  | 1947.73  | 16.93   | 6000.00   |
| <b>HCC-4</b>        | 692.31  | 497.81   | 1151.35  | 1012.57  | 1353.09  | 44.39    | 365.99   | 2783.64  | 2270.85  | 980.96   | 2687.11  | 3278.62  | 22.25   | 15000.00  |
| <b>IL-9</b>         | 0.00    | 0.00     | 0.00     | 957.62   | 0.00     | 0.00     | 0.00     | 2449.06  | 0.00     | 937.13   | 922.36   | 0.00     | 1465.55 | 300000.00 |
| <b>IL-17F</b>       | 0.00    | 0.00     | 0.00     | 0.00     | 0.00     | 0.00     | 0.00     | 0.00     | 0.00     | 0.00     | 0.00     | 0.00     | 92.04   | 150000.00 |
| <b>IL-18 BPa</b>    | 0.00    | 0.00     | 389.22   | 2468.23  | 443.99   | 0.00     | 0.00     | 330.70   | 0.00     | 275.51   | 353.78   | 0.00     | 478.42  | 90000.00  |
| <b>IL-28A</b>       | 0.00    | 0.00     | 152.56   | 705.88   | 114.44   | 0.00     | 0.00     | 0.00     | 0.00     | 0.00     | 0.00     | 0.00     | 104.53  | 15000.00  |
| <b>IL-29</b>        | 0.00    | 0.00     | 0.00     | 740.54   | 0.00     | 0.00     | 0.00     | 0.00     | 0.00     | 0.00     | 0.00     | 0.00     | 493.75  | 150000.00 |
| <b>IL-31</b>        | 0.00    | 0.00     | 0.00     | 75.29    | 0.00     | 0.00     | 0.00     | 0.00     | 0.00     | 0.00     | 0.00     | 0.00     | 48.91   | 60000.00  |
| <b>IP-10</b>        | 224.77  | 67.10    | 119.62   | 839.76   | 336.11   | 40.33    | 333.43   | 3230.65  | 3170.68  | 150.27   | 318.15   | 1195.92  | 56.65   | 15000.00  |
| <b>I-TAC</b>        | 0.00    | 0.00     | 0.00     | 65.23    | 0.00     | 0.00     | 0.00     | 0.00     | 0.00     | 0.00     | 0.00     | 0.00     | 32.05   | 15000.00  |
| <b>LIF</b>          | 0.00    | 0.00     | 0.00     | 81.29    | 0.00     | 0.00     | 0.00     | 71.73    | 63.33    | 0.00     | 0.00     | 0.00     | 100.88  | 19500.00  |
| <b>LIGHT</b>        | 0.00    | 0.00     | 49.92    | 256.36   | 0.00     | 0.00     | 0.00     | 69.57    | 61.18    | 63.54    | 0.00     | 0.00     | 98.27   | 15000.00  |
| <b>Lymphotactin</b> | 0.00    | 0.00     | 0.00     | 0.00     | 0.00     | 0.00     | 0.00     | 0.00     | 0.00     | 0.00     | 0.00     | 0.00     | 367.23  | 150000.00 |
| <b>MCP-2</b>        | 9.94    | 0.00     | 18.58    | 32.91    | 22.23    | 0.00     | 19.96    | 45.27    | 52.85    | 13.22    | 30.59    | 47.56    | 6.74    | 3000.00   |
| <b>MCP-3</b>        | 0.00    | 147.48   | 44.37    | 210.10   | 0.00     | 0.00     | 0.00     | 49.73    | 0.00     | 0.00     | 0.00     | 0.00     | 82.32   | 30000.00  |
| <b>MCP-4</b>        | 0.00    | 0.00     | 0.00     | 10.78    | 0.00     | 0.00     | 0.00     | 0.00     | 0.00     | 0.00     | 0.00     | 13.78    | 10.23   | 15000.00  |
| <b>MDC</b>          | 45.89   | 0.00     | 88.52    | 342.98   | 86.60    | 0.00     | 0.00     | 222.33   | 1279.93  | 0.00     | 662.77   | 882.89   | 29.43   | 15000.00  |
| <b>MIF</b>          | 2206.13 | 49924.47 | 1429.78  | 16340.03 | 3411.83  | 2092.28  | 1783.21  | 2636.31  | 8236.97  | 10121.40 | 7103.25  | 6100.83  | 911.42  | 150000.00 |
| <b>MIP-3a</b>       | 0.00    | 0.00     | 70.74    | 330.32   | 187.45   | 0.00     | 0.00     | 0.00     | 219.66   | 0.00     | 20.70    | 31.58    | 35.49   | 15000.00  |
| <b>MIP-3b</b>       | 123.70  | 0.00     | 277.38   | 342.34   | 0.00     | 0.00     | 225.99   | 501.20   | 60.63    | 179.32   | 850.10   | 2241.35  | 82.81   | 30000.00  |
| <b>MPIF-1</b>       | 0.00    | 0.00     | 0.00     | 1459.65  | 828.66   | 0.00     | 0.00     | 2275.78  | 7248.95  | 759.67   | 5004.59  | 10939.83 | 856.90  | 300000.00 |
| <b>MSPa</b>         | 0.00    | 0.00     | 415.27   | 1047.66  | 0.00     | 0.00     | 0.00     | 800.12   | 767.88   | 574.21   | 28093.04 | 529.99   | 611.34  | 150000.00 |
| <b>NAP-2</b>        | 7042.16 | 12763.02 | 8426.46  | 14664.15 | 26564.17 | 1961.43  | 12699.11 | 29649.12 | 40010.58 | 16689.87 | 35079.52 | 29676.54 | 112.89  | 30000.00  |

|             |          |           |          |          |          |          |          |           |           |          |          |          |        |          |
|-------------|----------|-----------|----------|----------|----------|----------|----------|-----------|-----------|----------|----------|----------|--------|----------|
| OPN         | 60917.57 | 103777.42 | 71272.78 | 64086.44 | 69557.07 | 82195.31 | 70380.07 | 101045.16 | 61237.69  | 96403.60 | 5078.88  | 69228.26 | 259.88 | 15000.00 |
| PARC        | 9810.56  | 9263.60   | 10438.53 | 11311.77 | 8414.69  | 1870.04  | 9425.11  | 15064.94  | 13587.72  | 6832.72  | 12861.48 | 12366.35 | 89.99  | 15000.00 |
| PF4         | 502.69   | 1363.10   | 2615.45  | 3826.70  | 1523.31  | 0.00     | 0.00     | 212.63    | 7059.86   | 341.54   | 151.05   | 1636.34  | 127.19 | 15000.00 |
| SDF-1a      | 0.00     | 353.58    | 344.46   | 2002.92  | 417.44   | 0.00     | 0.00     | 448.32    | 0.00      | 926.73   | 0.00     | 1871.10  | 606.97 | 15000.00 |
| TARC        | 0.00     | 0.00      | 0.00     | 32.05    | 0.00     | 0.00     | 0.00     | 0.00      | 0.00      | 0.00     | 0.00     | 16.01    | 18.58  | 15000.00 |
| TECK        | 0.00     | 0.00      | 0.00     | 637.01   | 335.59   | 0.00     | 0.00     | 0.00      | 1681.47   | 396.20   | 0.00     | 761.25   | 630.29 | 15000.00 |
| TSLP        | 0.00     | 0.00      | 0.00     | 257.26   | 0.00     | 0.00     | 0.00     | 0.00      | 0.00      | 113.70   | 0.00     | 0.00     | 142.52 | 60000.00 |
| 4-1BB       | 0.00     | 0.00      | 0.00     | 0.00     | 0.00     | 0.00     | 0.00     | 0.00      | 0.00      | 0.00     | 0.00     | 0.00     | 17.45  | 15000.00 |
| ALCAM       | 16.67    | 0.00      | 20.42    | 0.00     | 127.83   | 52.51    | 84.24    | 208.22    | 341.88    | 96.70    | 714.25   | 93.99    | 17.43  | 15000.00 |
| B7-1        | 0.00     | 0.00      | 0.00     | 0.00     | 0.00     | 0.00     | 0.00     | 0.00      | 0.00      | 0.00     | 0.00     | 0.00     | 15.95  | 15000.00 |
| BCMA        | 373.11   | 279.06    | 716.35   | 2231.85  | 1274.27  | 54.11    | 384.19   | 1220.50   | 1914.68   | 623.30   | 2879.26  | 3194.57  | 35.00  | 30000.00 |
| CD14        | 6800.97  | 7065.40   | 8166.31  | 7515.04  | 9172.78  | 9616.77  | 8838.01  | 6286.18   | 7911.16   | 10576.28 | 7318.74  | 8837.11  | 24.42  | 15000.00 |
| CD30        | 0.00     | 0.00      | 0.00     | 0.00     | 0.00     | 0.00     | 0.00     | 0.00      | 0.00      | 0.00     | 0.00     | 0.00     | 37.15  | 15000.00 |
| CD40 L      | 0.00     | 0.00      | 18.47    | 0.00     | 0.00     | 0.00     | 8.37     | 10.31     | 8.92      | 9.24     | 43.47    | 22.73    | 15.80  | 15000.00 |
| CEACAM-1    | 41.31    | 38.50     | 323.89   | 176.58   | 437.86   | 61.42    | 128.36   | 633.29    | 1112.04   | 265.83   | 438.59   | 365.54   | 24.00  | 15000.00 |
| DR6         | 6.64     | 0.00      | 0.00     | 12.87    | 5.08     | 0.00     | 0.00     | 10.03     | 13.09     | 8.82     | 0.00     | 0.00     | 6.00   | 6000.00  |
| Dtk         | 83.88    | 58.99     | 112.29   | 239.05   | 852.79   | 79.14    | 76.02    | 477.41    | 1252.22   | 191.66   | 419.25   | 435.33   | 34.00  | 30000.00 |
| Endoglin    | 0.00     | 0.00      | 0.00     | 8.43     | 7.63     | 0.00     | 0.00     | 7.64      | 67.32     | 0.00     | 20.80    | 23.02    | 10.84  | 6000.00  |
| ErbB3       | 39.78    | 41.99     | 0.00     | 105.97   | 150.91   | 132.03   | 157.98   | 635.70    | 436.30    | 181.26   | 1462.28  | 263.03   | 75.00  | 30000.00 |
| E-Selectin  | 253.15   | 37.19     | 68.11    | 526.93   | 411.08   | 65.35    | 238.07   | 1237.25   | 16841.58  | 253.40   | 1759.22  | 1317.04  | 68.00  | 60000.00 |
| Fas         | 0.00     | 0.00      | 0.00     | 5.43     | 66.48    | 10.39    | 20.79    | 78.51     | 65.96     | 39.18    | 258.28   | 58.39    | 10.55  | 3000.00  |
| Flt-3L      | 29.94    | 29.83     | 24.35    | 60.58    | 78.18    | 10.19    | 24.93    | 87.98     | 173.86    | 29.36    | 71.84    | 117.35   | 5.13   | 3000.00  |
| GITR        | 11.86    | 20.81     | 0.00     | 27.92    | 14.26    | 0.00     | 10.74    | 22.42     | 0.00      | 8.30     | 0.00     | 0.00     | 15.00  | 15000.00 |
| HVEM        | 185.20   | 200.94    | 377.46   | 328.48   | 445.67   | 102.01   | 138.38   | 220.06    | 378.64    | 144.65   | 165.42   | 199.34   | 53.89  | 60000.00 |
| ICAM-3      | 0.00     | 0.00      | 0.00     | 0.00     | 0.00     | 0.00     | 0.00     | 0.00      | 0.00      | 0.00     | 0.00     | 0.00     | 139.73 | 15000.00 |
| IL-1 R4     | 0.00     | 10.32     | 0.00     | 12.42    | 19.27    | 0.00     | 0.00     | 61.94     | 26.07     | 15.12    | 0.00     | 0.00     | 19.49  | 6000.00  |
| IL-1 RI     | 0.00     | 0.00      | 0.00     | 0.00     | 0.00     | 0.00     | 0.00     | 0.00      | 0.00      | 0.00     | 0.00     | 0.00     | 18.52  | 6000.00  |
| IL-2 Rg     | 0.00     | 0.00      | 0.00     | 0.00     | 0.00     | 0.00     | 0.00     | 270.23    | 0.00      | 0.00     | 0.00     | 0.00     | 57.52  | 15000.00 |
| IL-10 Rb    | 0.00     | 0.00      | 9.96     | 18.07    | 0.00     | 0.00     | 0.00     | 0.00      | 0.00      | 0.00     | 28.95    | 47.47    | 16.82  | 6000.00  |
| IL-17R      | 0.00     | 0.00      | 0.00     | 0.00     | 0.00     | 0.00     | 0.00     | 19.81     | 0.00      | 0.00     | 0.00     | 0.00     | 23.81  | 15000.00 |
| IL-21R      | 60.58    | 0.00      | 131.06   | 95.52    | 87.65    | 0.00     | 0.00     | 389.63    | 0.00      | 83.52    | 0.00     | 0.00     | 78.00  | 30000.00 |
| LIMPII      | 161.80   | 212.41    | 236.72   | 513.78   | 321.10   | 56.04    | 32.23    | 241.43    | 264.57    | 103.09   | 9.60     | 92.87    | 15.00  | 6000.00  |
| Lipocalin-2 | 86.94    | 80.72     | 118.17   | 154.06   | 355.12   | 218.72   | 300.28   | 301.85    | 304.51    | 333.89   | 382.95   | 351.96   | 1.76   | 1500.00  |
| L-Selectin  | 7766.79  | 2266.32   | 7631.07  | 11897.75 | 55334.20 | 3625.38  | 23358.02 | 74097.02  | 131321.09 | 31910.37 | 97941.23 | 99366.51 | 422.00 | 15000.00 |
| LYVE-1      | 879.46   | 643.49    | 549.20   | 658.59   | 1229.23  | 586.58   | 899.94   | 1176.91   | 1385.38   | 792.51   | 755.56   | 1134.45  | 8.96   | 3000.00  |
| MICA        | 0.00     | 0.00      | 0.00     | 0.00     | 0.00     | 0.00     | 0.00     | 0.00      | 0.00      | 0.00     | 0.00     | 0.00     | 37.12  | 15000.00 |
| MICB        | 0.00     | 0.00      | 0.00     | 99.28    | 0.00     | 0.00     | 0.00     | 98.44     | 86.58     | 70.28    | 0.00     | 0.00     | 77.21  | 22500.00 |
| NRG1-b1     | 0.00     | 0.00      | 0.00     | 0.00     | 0.00     | 0.00     | 0.00     | 0.00      | 0.00      | 0.00     | 0.00     | 0.00     | 18.38  | 22500.00 |
| PDGF Rb     | 0.00     | 0.00      | 0.00     | 0.00     | 0.00     | 0.00     | 0.00     | 56.07     | 82.35     | 0.00     | 131.84   | 0.00     | 90.01  | 15000.00 |

|                         |              |             |             |              |               |             |              |              |               |              |               |               |             |                |
|-------------------------|--------------|-------------|-------------|--------------|---------------|-------------|--------------|--------------|---------------|--------------|---------------|---------------|-------------|----------------|
|                         |              |             |             |              |               |             |              |              |               |              |               |               |             | 00             |
| <b>PECAM-1</b>          | 172.2<br>9   | 122.66      | 164.2<br>6  | 58.19        | 200.86        | 62.40       | 143.0<br>3   | 221.13       | 525.17        | 213.1<br>4   | 0.00          | 196.49        | 81.00       | 30000.0<br>0   |
| <b>RAGE</b>             | 38.94        | 7.13        | 11.85       | 72.87        | 90.77         | 0.00        | 7.52         | 121.68       | 179.96        | 26.09        | 55.40         | 446.56        | 12.34       | 15000.0<br>0   |
| <b>TIM-1</b>            | 0.00         | 0.00        | 22.31       | 66.55        | 0.00          | 14.95       | 12.70        | 0.00         | 39.74         | 0.00         | 0.00          | 0.00          | 25.07       | 15000.0<br>0   |
| <b>TRAIL R3</b>         | 26.87        | 9.97        | 25.73       | 16.33        | 338.05        | 118.1<br>5  | 214.6<br>1   | 363.27       | 761.14        | 245.0<br>1   | 617.39        | 228.78        | 11.15       | 7500.00        |
| <b>Trappin-2</b>        | 2336.<br>94  | 1473.3<br>2 | 2629.<br>92 | 2390.<br>55  | 3685.8<br>9   | 956.6<br>4  | 2358.<br>01  | 3446.7<br>7  | 3829.7<br>0   | 2458.<br>57  | 3585.5<br>6   | 3569.3<br>6   | 59.84       | 15000.0<br>0   |
| <b>uPAR</b>             | 284.4<br>8   | 123.19      | 453.8<br>7  | 583.3<br>0   | 4756.9<br>3   | 338.4<br>9  | 497.3<br>7   | 2415.8<br>3  | 10030.<br>96  | 673.0<br>8   | 1961.1<br>9   | 3635.6<br>4   | 91.02       | 60000.0<br>0   |
| <b>VCAM-1</b>           | 13838<br>.81 | 4056.0<br>7 | 1465.<br>99 | 8446.<br>08  | 29469.<br>36  | 5800.<br>18 | 12934<br>.41 | 32913.<br>23 | 156659<br>.16 | 15527<br>.68 | 320703<br>.90 | 114148<br>.13 | 889.0<br>0  | 300000.<br>00  |
| <b>XEDAR</b>            | 0.00         | 0.00        | 0.00        | 0.00         | 0.00          | 0.00        | 0.00         | 0.00         | 0.00          | 0.00         | 0.00          | 0.00          | 37.11       | 15000.0<br>0   |
| <b>Activin A</b>        | 335.4<br>9   | 487.69      | 384.1<br>9  | 418.8<br>7   | 241.68        | 0.00        | 281.3<br>2   | 396.01       | 362.72        | 347.6<br>3   | 788.77        | 345.41        | 468.1<br>1  | 150000.<br>00  |
| <b>AgRP</b>             | 83.78        | 277.22      | 616.0<br>5  | 406.0<br>4   | 1788.6<br>7   | 410.4<br>5  | 276.7<br>6   | 612.40       | 334.38        | 707.6<br>6   | 1170.6<br>1   | 622.45        | 69.42       | 15000.0<br>0   |
| <b>ANG</b>              | 1757.<br>70  | 2213.7<br>9 | 2399.<br>57 | 2077.<br>64  | 2117.7<br>2   | 2445.<br>91 | 2140.<br>61  | 1897.5<br>5  | 1926.8<br>2   | 2696.<br>13  | 2112.2<br>1   | 1995.2<br>1   | 3.21        | 3000.00        |
| <b>ANG-1</b>            | 168.7<br>5   | 334.64      | 127.1<br>5  | 272.7<br>6   | 186.04        | 200.7<br>0  | 43.98        | 218.86       | 219.83        | 166.2<br>3   | 454.19        | 406.06        | 68.81       | 60000.0<br>0   |
| <b>Angiostat<br/>in</b> | 3836.<br>08  | 0.00        | 8016.<br>68 | 14697<br>.39 | 55793.<br>13  | 2926.<br>30 | 22933<br>.80 | 70255.<br>27 | 531575<br>.64 | 48177<br>.85 | 643933<br>.48 | 223806<br>.24 | 5509.<br>34 | 150000<br>0.00 |
| <b>Cathepri<br/>n S</b> | 5739.<br>65  | 3549.4<br>5 | 5764.<br>57 | 4867.<br>74  | 6407.6<br>7   | 1420.<br>92 | 4862.<br>20  | 10446.<br>17 | 8179.6<br>4   | 5532.<br>98  | 7514.4<br>1   | 11902.<br>28  | 18.12       | 15000.0<br>0   |
| <b>CD 40</b>            | 10.95        | 14.13       | 0.00        | 0.00         | 21.38         | 22.84       | 12.70        | 38.13        | 10.77         | 12.56        | 79.76         | 44.82         | 6.31        | 15000.0<br>0   |
| <b>Cripto-1</b>         | 745.9<br>4   | 968.62      | 1191.<br>77 | 730.1<br>6   | 842.69        | 201.9<br>0  | 47.27        | 302.75       | 83.19         | 392.4<br>1   | 94.20         | 73.83         | 40.45       | 15000.0<br>0   |
| <b>DAN</b>              | 383.4<br>3   | 29.18       | 206.1<br>6  | 57.65        | 77.42         | 43.16       | 50.41        | 318.22       | 354.65        | 222.3<br>6   | 785.05        | 563.97        | 57.36       | 60000.0<br>0   |
| <b>DKK-1</b>            | 4079.<br>13  | 3300.0<br>5 | 4993.<br>13 | 3201.<br>52  | 272828<br>.78 | 5650.<br>90 | 770.2<br>0   | 6188.2<br>9  | 291023<br>.49 | 2379.<br>35  | 50175.<br>35  | 127741<br>.50 | 493.1<br>3  | 120000.<br>00  |
| <b>E-<br/>Cadherin</b>  | 0.00         | 0.00        | 0.00        | 0.00         | 137.43        | 53.40       | 0.00         | 0.00         | 0.00          | 0.00         | 150.88        | 0.00          | 101.9<br>4  | 120000.<br>00  |
| <b>EpCAM</b>            | 0.00         | 0.00        | 0.00        | 30.85        | 14.60         | 0.00        | 0.00         | 48.92        | 17.39         | 0.00         | 36.03         | 19.43         | 21.27       | 30000.0<br>0   |
| <b>FAS L</b>            | 0.00         | 0.00        | 0.00        | 3.11         | 10.14         | 2.20        | 0.00         | 13.28        | 7.28          | 0.00         | 13.82         | 9.36          | 3.72        | 3000.00        |
| <b>Fcr<br/>RIIB/C</b>   | 1418.<br>21  | 1070.2<br>7 | 993.2<br>6  | 554.7<br>4   | 115.49        | 73.83       | 369.9<br>0   | 466.15       | 841.59        | 30.77        | 1429.7<br>3   | 763.28        | 34.87       | 15000.0<br>0   |
| <b>Follistati<br/>n</b> | 120.1<br>1   | 1648.8<br>0 | 95.49       | 278.0<br>7   | 1268.1<br>0   | 108.2<br>7  | 317.9<br>9   | 263.61       | 4924.4<br>3   | 57.98        | 3992.5<br>4   | 5690.8<br>7   | 82.72       | 60000.0<br>0   |
| <b>Galectin-<br/>7</b>  | 172.2<br>5   | 0.00        | 0.00        | 252.8<br>0   | 146.82        | 185.3<br>7  | 0.00         | 212.27       | 573.95        | 129.5<br>5   | 1146.6<br>4   | 717.80        | 162.3<br>6  | 150000.<br>00  |
| <b>ICAM-2</b>           | 4148.<br>52  | 1094.1<br>7 | 1669.<br>08 | 3296.<br>75  | 6377.3<br>4   | 621.7<br>2  | 2150.<br>50  | 8815.2<br>0  | 16784.<br>72  | 2462.<br>63  | 23628.<br>95  | 8121.6<br>9   | 457.4<br>1  | 150000.<br>00  |
| <b>IL-13 R1</b>         | 79.94        | 0.00        | 0.00        | 35.38        | 99.30         | 0.00        | 0.00         | 0.00         | 0.00          | 0.00         | 61.51         | 128.54        | 39.84       | 15000.0<br>0   |
| <b>IL-13 R2</b>         | 0.00         | 0.00        | 0.00        | 469.6<br>6   | 0.00          | 400.4<br>6  | 1498.<br>14  | 557.53       | 934.39        | 0.00         | 2284.7<br>0   | 390.41        | 607.8<br>3  | 30000.0<br>0   |
| <b>IL-17B</b>           | 495.5<br>6   | 0.00        | 0.00        | 0.00         | 517.07        | 90.26       | 0.00         | 0.00         | 533.48        | 0.00         | 587.79        | 551.47        | 75.31       | 60000.0<br>0   |
| <b>IL-2 Ra</b>          | 22.98        | 0.00        | 12.89       | 27.96        | 21.62         | 0.00        | 0.00         | 28.06        | 43.77         | 0.00         | 64.54         | 25.64         | 21.62       | 15000.0<br>0   |
| <b>IL-2 Rb</b>          | 0.00         | 0.00        | 0.00        | 0.00         | 322.01        | 0.00        | 0.00         | 437.86       | 481.95        | 0.00         | 865.53        | 0.00          | 517.8<br>2  | 150000.<br>00  |
| <b>IL-23</b>            | 0.00         | 0.00        | 0.00        | 0.00         | 0.00          | 0.00        | 0.00         | 0.00         | 0.00          | 0.00         | 0.00          | 0.00          | 46.33       | 60000.0<br>0   |
| <b>LAP</b>              | 76.89        | 24.03       | 71.65       | 148.5<br>5   | 123.62        | 12.27       | 45.25        | 181.21       | 1166.1<br>1   | 37.39        | 668.58        | 687.39        | 10.38       | 6000.00        |
| <b>NrCAM</b>            | 9747.<br>39  | 8960.1<br>0 | 7281.<br>00 | 8835.<br>88  | 11311.<br>49  | 3696.<br>54 | 3919.<br>73  | 7864.0<br>3  | 3590.4<br>3   | 5563.<br>49  | 1833.8<br>9   | 569.22        | 37.58       | 30000.0<br>0   |
| <b>PAI-I</b>            | 1030.<br>52  | 352.03      | 157.9<br>1  | 972.4<br>8   | 4451.3<br>8   | 4272.<br>66 | 3619.<br>42  | 4331.9<br>2  | 6192.7<br>6   | 4000.<br>18  | 7603.4<br>9   | 2124.7<br>4   | 112.5<br>2  | 60000.0<br>0   |
| <b>PDGF-AB</b>          | 146.7<br>1   | 45.45       | 0.00        | 157.3<br>5   | 274.25        | 42.01       | 40.35        | 357.90       | 518.29        | 98.79        | 791.78        | 221.77        | 61.86       | 15000.0<br>0   |
| <b>Resistin</b>         | 23.98        | 3.76        | 16.38       | 196.2<br>0   | 2358.4<br>4   | 3.74        | 25.28        | 99.03        | 3905.5<br>5   | 24.28        | 374.86        | 388.98        | 5.35        | 30000.0<br>0   |
| <b>SDF-1b</b>           | 1181.<br>38  | 645.86      | 0.00        | 1264.<br>13  | 2743.5<br>5   | 1674.<br>05 | 1312.<br>83  | 2069.2<br>9  | 1516.1<br>6   | 738.3<br>2   | 1225.9<br>7   | 2180.8<br>7   | 248.0<br>0  | 60000.0<br>0   |

|                 |              |              |              |              |              |              |              |              |              |              |              |              |             |               |
|-----------------|--------------|--------------|--------------|--------------|--------------|--------------|--------------|--------------|--------------|--------------|--------------|--------------|-------------|---------------|
| <b>sgp130</b>   | 19139<br>.37 | 14271.<br>54 | 12811<br>.11 | 18288<br>.39 | 21007.<br>40 | 18191<br>.17 | 12623<br>.46 | 22067.<br>44 | 16467.<br>99 | 11629<br>.50 | 13114.<br>38 | 8979.0<br>3  | 146.9<br>5  | 120000.<br>00 |
| <b>Shh N</b>    | 150.3<br>0   | 52.93        | 143.1<br>6   | 84.24        | 309.49       | 65.63        | 57.44        | 166.19       | 94.21        | 79.36        | 141.30       | 113.30       | 95.65       | 60000.0<br>0  |
| <b>Siglec-5</b> | 4982.<br>86  | 5792.6<br>7  | 10556<br>.07 | 11513<br>.31 | 48720.<br>13 | 11314<br>.37 | 5879.<br>78  | 38305.<br>19 | 41830.<br>21 | 18619<br>.65 | 41594.<br>90 | 29929.<br>65 | 22.15       | 15000.0<br>0  |
| <b>ST2</b>      | 12.58        | 0.00         | 0.00         | 0.00         | 15.84        | 0.00         | 0.00         | 15.36        | 26.45        | 0.00         | 25.29        | 10.09        | 10.84       | 6000.00       |
| <b>TGF-b2</b>   | 1761.<br>58  | 2237.4<br>6  | 642.0<br>4   | 1144.<br>09  | 1596.6<br>7  | 1589.<br>42  | 1442.<br>49  | 1984.1<br>3  | 315.76       | 384.3<br>9   | 547.14       | 695.20       | 98.12       | 60000.0<br>0  |
| <b>Tie-2</b>    | 0.00         | 0.00         | 0.00         | 0.00         | 58.60        | 0.00         | 0.00         | 0.00         | 0.00         | 0.00         | 120.87       | 0.00         | 41.00       | 15000.0<br>0  |
| <b>TPO</b>      | 2075.<br>99  | 0.00         | 0.00         | 0.00         | 2436.0<br>4  | 3060.<br>06  | 2164.<br>49  | 1171.2<br>4  | 2865.2<br>1  | 1057.<br>36  | 2449.3<br>1  | 1902.5<br>6  | 1525.<br>86 | 30000.<br>00  |
| <b>TRAIL-R4</b> | 17.14        | 17.22        | 0.00         | 0.00         | 21.26        | 0.00         | 13.37        | 32.66        | 24.66        | 17.73        | 48.69        | 33.22        | 26.25       | 12000.0<br>0  |
| <b>TREM-1</b>   | 0.00         | 0.00         | 0.00         | 0.00         | 0.00         | 0.00         | 0.00         | 0.00         | 83.59        | 0.00         | 97.74        | 0.00         | 39.51       | 30000.0<br>0  |
| <b>VEGF-C</b>   | 721.4<br>9   | 508.92       | 426.8<br>2   | 501.7<br>9   | 900.26       | 451.3<br>6   | 331.8<br>2   | 934.36       | 392.53       | 535.4<br>1   | 304.96       | 198.34       | 47.99       | 30000.0<br>0  |
| <b>VEGF R1</b>  | 41855<br>.51 | 57701.<br>90 | 45868<br>.64 | 47718<br>.85 | 80703.<br>03 | 61226<br>.38 | 42189<br>.35 | 89231.<br>69 | 77506.<br>17 | 53023<br>.80 | 11994.<br>28 | 26297.<br>44 | 120.7<br>4  | 60000.0<br>0  |

**Supplemental Table 5. Clinical outcomes of bevacizumab injection.** Abbreviations: VH – vitreous hemorrhage, HM – hand motion, CF – counts fingers.

| Case    |                 | Pre-Injection |          | Post-Injection |          |
|---------|-----------------|---------------|----------|----------------|----------|
| Patient | Baseline Acuity | Visual Acuity | VH Grade | Visual Acuity  | VH Grade |
| 1       | 20/40           | 20/70         | +2       | 20/40          | +0       |
| 2       | 20/150          | 20/200        | +3       | 20/150         | +0       |
| 3       | 20/80           | HM            | +4       | 20/80          | +0       |
| 4       | 20/40           | 20/200        | +3       | 20/40          | +0       |
| 5       | 20/400          | HM            | +4       | 20/400         | +0       |
| 6       | 20/600          | CF            | +4       | 20/600         | +0       |
| 7       | 20/30           | 20/60         | +2       | 20/30          | +0       |

**Supplemental Table 6. Clinical outcomes of methotrexate injection.**

| <b>Case</b>    | <b>Anterior Chamber Cells</b> |                       | <b>Anterior Chamber Flare</b> |                       |
|----------------|-------------------------------|-----------------------|-------------------------------|-----------------------|
| <b>Patient</b> | <b>Pre-Injection</b>          | <b>Post-Injection</b> | <b>Pre-Injection</b>          | <b>Post-Injection</b> |
| 1              | +4                            | +1                    | +3                            | +2                    |
| 2              | +3                            | +0.5                  | +3                            | +1                    |
| 3              | +3.5                          | +0.5                  | +2                            | +2                    |
| 4              | +2                            | +0                    | +1                            | +1                    |
| 5              | +3                            | +1                    | +2                            | +1                    |



**Supplemental Table 7. Quantitative results for individual patients post-Retisert.** Cytokines concentrations are listed in pg/ml.

| Stage<br>Patient | Post-Retisert |          |           | QC      |           |
|------------------|---------------|----------|-----------|---------|-----------|
|                  | 6             | 7        | 8         | LOD     | MAX       |
| BLC              | 24.80         | 28.50    | 423.30    | 17.73   | 3000.00   |
| Eotaxin          | 0.00          | 0.00     | 6.40      | 13.06   | 6000.00   |
| Eotaxin-2        | 9.20          | 7.40     | 53.10     | 4.69    | 1500.00   |
| G-CSF            | 114.40        | 44.20    | 150.60    | 22.54   | 30000.00  |
| GM-CSF           | 0.00          | 0.00     | 0.00      | 4.32    | 1500.00   |
| I-309            | 8.60          | 0.00     | 27.70     | 11.34   | 6000.00   |
| ICAM-1           | 5730.40       | 3017.70  | 9211.00   | 78.00   | 150000.00 |
| IFNg             | 0.00          | 0.00     | 0.00      | 16.12   | 3000.00   |
| IL-1a            | 18.60         | 3.00     | 0.00      | 11.51   | 3000.00   |
| IL-1b            | 0.00          | 0.00     | 0.80      | 1.84    | 1500.00   |
| IL-1ra           | 0.00          | 49.90    | 0.00      | 7.00    | 3000.00   |
| IL-2             | 34.40         | 35.70    | 0.00      | 20.81   | 3000.00   |
| IL-4             | 0.00          | 0.00     | 0.00      | 9.85    | 3000.00   |
| IL-5             | 0.00          | 0.00     | 0.00      | 26.68   | 6000.00   |
| IL-6             | 172.80        | 197.00   | 1564.10   | 13.95   | 3000.00   |
| IL-6sR           | 0.00          | 0.00     | 0.00      | 11.00   | 15000.00  |
| IL-7             | 22.00         | 45.40    | 21.50     | 20.42   | 6000.00   |
| IL-8             | 22.00         | 26.30    | 108.10    | 3.63    | 750.00    |
| IL-10            | 0.00          | 0.00     | 0.00      | 7.66    | 6000.00   |
| IL-11            | 69.20         | 27.90    | 33.30     | 64.81   | 30000.00  |
| IL-12p40         | 0.00          | 0.00     | 0.00      | 18.76   | 15000.00  |
| IL-12p70         | 1.80          | 0.00     | 0.00      | 2.01    | 750.00    |
| IL-13            | 0.00          | 0.00     | 0.00      | 3.57    | 1500.00   |
| IL-15            | 0.00          | 122.60   | 80.70     | 19.00   | 6000.00   |
| IL-16            | 29.80         | 8.50     | 48.40     | 24.60   | 7500.00   |
| IL-17            | 10.20         | 0.00     | 5.40      | 20.05   | 6000.00   |
| MCP-1            | 951.80        | 1190.10  | 512.60    | 83.47   | 15000.00  |
| MCSF             | 73.60         | 7.90     | 1.80      | 6.92    | 6000.00   |
| MIG              | 326.80        | 314.40   | 423.30    | 35.00   | 7500.00   |
| MIP-1a           | 978.40        | 238.90   | 127.20    | 72.30   | 15000.00  |
| MIP-1b           | 0.00          | 0.00     | 153.60    | 13.62   | 6000.00   |
| MIP-1d           | 471.60        | 142.20   | 181.70    | 7.77    | 15000.00  |
| PDGF-BB          | 5.20          | 1.60     | 5.70      | 3.16    | 3000.00   |
| RANTES           | 0.00          | 0.00     | 0.00      | 88.00   | 300000.00 |
| TIMP-1           | 28516.60      | 11693.10 | 14518.50  | 17.21   | 60000.00  |
| TIMP-2           | 34679.40      | 13328.90 | 17911.30  | 56.99   | 60000.00  |
| TNFa             | 55.60         | 19.60    | 26.10     | 14.39   | 3000.00   |
| TNfb             | 0.00          | 0.00     | 0.00      | 28.59   | 30000.00  |
| TNF RI           | 2368.00       | 2378.90  | 4314.40   | 40.35   | 60000.00  |
| TNF RII          | 374.40        | 276.40   | 1032.80   | 20.21   | 60000.00  |
| AR               | 0.00          | 0.00     | 0.00      | 50.63   | 15000.00  |
| BDNF             | 0.00          | 0.00     | 0.00      | 13.68   | 3000.00   |
| bFGF             | 0.00          | 0.00     | 0.00      | 121.00  | 30000.00  |
| BMP-4            | 0.00          | 0.00     | 0.00      | 181.13  | 150000.00 |
| BMP-5            | 0.00          | 0.00     | 0.00      | 1620.00 | 150000.00 |
| BMP-7            | 0.00          | 0.00     | 0.00      | 1366.13 | 60000.00  |
| b-NGF            | 0.00          | 0.00     | 0.00      | 14.93   | 15000.00  |
| EGF              | 0.00          | 0.00     | 0.00      | 1.04    | 300.00    |
| EGF R            | 5058.20       | 2452.30  | 2208.40   | 26.47   | 15000.00  |
| EG-VEGF          | 0.00          | 0.00     | 0.00      | 55.17   | 15000.00  |
| FGF-4            | 0.00          | 0.00     | 0.00      | 740.41  | 150000.00 |
| FGF-7            | 0.00          | 0.00     | 0.00      | 23.14   | 15000.00  |
| GDF-15           | 903.80        | 1228.20  | 1146.70   | 3.40    | 3000.00   |
| GDNF             | 0.00          | 0.00     | 0.00      | 38.63   | 6000.00   |
| GH               | 0.00          | 0.00     | 0.00      | 51.01   | 15000.00  |
| HB-EGF           | 0.00          | 0.00     | 0.00      | 29.54   | 15000.00  |
| HGF              | 10045.80      | 9332.80  | 6656.90   | 19.01   | 6000.00   |
| IGFBP-1          | 1163.00       | 1446.20  | 793.90    | 26.59   | 7500.00   |
| IGFBP-2          | 31824.60      | 18038.60 | 17200.50  | 141.15  | 30000.00  |
| IGFBP-3          | 13836.80      | 28644.50 | 111671.80 | 947.11  | 300000.00 |

|                     |           |           |          |         |           |
|---------------------|-----------|-----------|----------|---------|-----------|
| <b>IGFBP-4</b>      | 7553.20   | 18762.00  | 20886.90 | 1127.42 | 300000.00 |
| <b>IGFBP-6</b>      | 91699.60  | 72033.00  | 64453.10 | 414.82  | 150000.00 |
| <b>IGF-I</b>        | 0.00      | 0.00      | 0.00     | 123.00  | 30000.00  |
| <b>Insulin</b>      | 0.00      | 0.00      | 0.00     | 112.00  | 30000.00  |
| <b>MCF R</b>        | 13345.00  | 4681.30   | 6365.00  | 58.83   | 60000.00  |
| <b>NGF R</b>        | 2744.60   | 1415.00   | 1722.20  | 40.18   | 15000.00  |
| <b>NT-3</b>         | 0.00      | 0.00      | 0.00     | 128.69  | 60000.00  |
| <b>NT-4</b>         | 0.00      | 47.90     | 7.60     | 34.75   | 15000.00  |
| <b>OPG</b>          | 5602.20   | 4491.50   | 4279.30  | 13.38   | 6000.00   |
| <b>PDGF-AA</b>      | 560.80    | 299.50    | 232.00   | 14.69   | 15000.00  |
| <b>PIGF</b>         | 29.80     | 5.30      | 78.40    | 6.76    | 6000.00   |
| <b>SCF</b>          | 0.00      | 0.00      | 0.00     | 12.02   | 15000.00  |
| <b>SCF R</b>        | 1350.80   | 748.10    | 1077.70  | 95.84   | 30000.00  |
| <b>TGFa</b>         | 0.00      | 14.50     | 21.10    | 19.56   | 15000.00  |
| <b>TGFb1</b>        | 0.00      | 0.00      | 0.00     | 1163.12 | 150000.00 |
| <b>TGFb3</b>        | 0.00      | 0.00      | 0.00     | 137.80  | 60000.00  |
| <b>VEGF</b>         | 107.40    | 43.20     | 4336.40  | 43.83   | 15000.00  |
| <b>VEGF R2</b>      | 9993.00   | 10274.30  | 1190.00  | 27.44   | 15000.00  |
| <b>VEGF R3</b>      | 0.00      | 0.00      | 0.00     | 94.73   | 60000.00  |
| <b>VEGF-D</b>       | 0.00      | 0.00      | 0.00     | 48.08   | 30000.00  |
| <b>6Ckine</b>       | 352.20    | 220.30    | 0.00     | 403.78  | 60000.00  |
| <b>Axl</b>          | 809.40    | 334.30    | 13.90    | 19.14   | 6000.00   |
| <b>BTC</b>          | 673.00    | 1328.10   | 0.00     | 1235.00 | 150000.00 |
| <b>CCL28</b>        | 255.60    | 117.60    | 0.00     | 217.07  | 60000.00  |
| <b>CTACK</b>        | 0.00      | 21.40     | 0.00     | 183.60  | 75000.00  |
| <b>CXCL16</b>       | 9628.00   | 5986.30   | 5447.90  | 80.42   | 30000.00  |
| <b>ENA-78</b>       | 68.20     | 96.50     | 40.60    | 71.91   | 15000.00  |
| <b>Eotaxin-3</b>    | 0.00      | 0.00      | 0.00     | 115.48  | 30000.00  |
| <b>GCP-2</b>        | 19.00     | 109.40    | 153.70   | 30.63   | 15000.00  |
| <b>GRO</b>          | 280.40    | 492.80    | 258.40   | 14.83   | 1500.00   |
| <b>HCC-1</b>        | 2477.40   | 1050.50   | 1152.80  | 16.93   | 6000.00   |
| <b>HCC-4</b>        | 291.00    | 1096.50   | 539.20   | 22.25   | 15000.00  |
| <b>IL-9</b>         | 0.00      | 96.80     | 0.00     | 1465.55 | 300000.00 |
| <b>IL-17F</b>       | 0.00      | 0.00      | 0.00     | 92.04   | 150000.00 |
| <b>IL-18 BPa</b>    | 0.00      | 319.70    | 0.00     | 478.42  | 90000.00  |
| <b>IL-28A</b>       | 0.00      | 10.00     | 0.00     | 104.53  | 15000.00  |
| <b>IL-29</b>        | 0.00      | 396.60    | 0.00     | 493.75  | 150000.00 |
| <b>IL-31</b>        | 0.00      | 216.10    | 37.10    | 48.91   | 60000.00  |
| <b>IP-10</b>        | 152.80    | 225.80    | 904.90   | 56.65   | 15000.00  |
| <b>I-TAC</b>        | 0.00      | 0.00      | 5.80     | 32.05   | 15000.00  |
| <b>LIF</b>          | 0.00      | 47.00     | 33.50    | 100.88  | 19500.00  |
| <b>LIGHT</b>        | 0.00      | 17.20     | 0.00     | 98.27   | 15000.00  |
| <b>Lymphotactin</b> | 0.00      | 69.80     | 0.00     | 367.23  | 150000.00 |
| <b>MCP-2</b>        | 10.60     | 3.90      | 15.00    | 6.74    | 3000.00   |
| <b>MCP-3</b>        | 0.00      | 0.00      | 0.00     | 82.32   | 30000.00  |
| <b>MCP-4</b>        | 21.80     | 22.00     | 0.00     | 10.23   | 15000.00  |
| <b>MDC</b>          | 16.20     | 26.40     | 251.50   | 29.43   | 15000.00  |
| <b>MIF</b>          | 383.80    | 424.80    | 6022.40  | 911.42  | 150000.00 |
| <b>MIP-3a</b>       | 31.40     | 75.50     | 365.00   | 35.49   | 15000.00  |
| <b>MIP-3b</b>       | 71.60     | 130.70    | 124.00   | 82.81   | 30000.00  |
| <b>MPIF-1</b>       | 19.60     | 40.30     | 33.00    | 856.90  | 300000.00 |
| <b>MSPa</b>         | 0.00      | 93.00     | 289.10   | 611.34  | 150000.00 |
| <b>NAP-2</b>        | 1474.20   | 790.30    | 4865.90  | 112.89  | 30000.00  |
| <b>OPN</b>          | 715831.60 | 433823.60 | 6722.30  | 259.88  | 150000.00 |
| <b>PARC</b>         | 4030.00   | 20365.10  | 23047.60 | 89.99   | 15000.00  |
| <b>PF4</b>          | 0.00      | 110.10    | 1369.10  | 127.19  | 150000.00 |
| <b>SDF-1a</b>       | 90.60     | 155.30    | 38.30    | 606.97  | 150000.00 |
| <b>TARC</b>         | 0.00      | 8.60      | 0.00     | 18.58   | 15000.00  |
| <b>TECK</b>         | 0.00      | 165.50    | 0.00     | 630.29  | 150000.00 |
| <b>TSLP</b>         | 0.00      | 41.10     | 4.80     | 142.52  | 60000.00  |
| <b>4-1BB</b>        | 0.00      | 0.00      | 23.90    | 17.45   | 15000.00  |
| <b>ALCAM</b>        | 103.40    | 19.80     | 78.80    | 17.43   | 15000.00  |
| <b>B7-1</b>         | 0.00      | 0.00      | 0.00     | 15.95   | 15000.00  |
| <b>BCMA</b>         | 1125.40   | 1332.30   | 2901.10  | 35.00   | 30000.00  |
| <b>CD14</b>         | 25996.80  | 12102.70  | 14834.50 | 24.42   | 15000.00  |
| <b>CD30</b>         | 93.40     | 52.80     | 75.10    | 37.15   | 15000.00  |

|             |          |          |          |         |            |
|-------------|----------|----------|----------|---------|------------|
| CD40 L      | 0.00     | 0.00     | 17.40    | 15.80   | 15000.00   |
| CEACAM-1    | 445.60   | 287.50   | 1396.40  | 24.00   | 15000.00   |
| DR6         | 68.00    | 18.90    | 42.40    | 6.00    | 6000.00    |
| Dtk         | 179.60   | 241.80   | 541.80   | 34.00   | 30000.00   |
| Endoglin    | 0.00     | 0.00     | 8.70     | 10.84   | 6000.00    |
| ErbB3       | 151.60   | 163.20   | 144.90   | 75.00   | 30000.00   |
| E-Selectin  | 0.00     | 36.70    | 122.50   | 68.00   | 60000.00   |
| Fas         | 43.80    | 31.90    | 43.90    | 10.55   | 3000.00    |
| Flt-3L      | 27.60    | 37.40    | 23.40    | 5.13    | 3000.00    |
| GITR        | 0.00     | 0.00     | 0.00     | 15.00   | 15000.00   |
| HVEM        | 671.40   | 481.80   | 391.40   | 53.89   | 60000.00   |
| ICAM-3      | 0.00     | 0.00     | 0.00     | 139.73  | 150000.00  |
| IL-1 R4     | 0.00     | 6.90     | 94.70    | 19.49   | 6000.00    |
| IL-1 RI     | 0.00     | 0.00     | 0.00     | 18.52   | 6000.00    |
| IL-2 Rg     | 0.00     | 0.00     | 0.00     | 57.52   | 15000.00   |
| IL-10 Rb    | 0.00     | 0.00     | 0.00     | 16.82   | 6000.00    |
| IL-17R      | 0.00     | 0.00     | 0.00     | 23.81   | 15000.00   |
| IL-21R      | 0.00     | 0.00     | 0.00     | 78.00   | 30000.00   |
| LIMPII      | 306.00   | 384.80   | 250.10   | 15.00   | 6000.00    |
| Lipocalin-2 | 713.80   | 615.40   | 1204.80  | 1.76    | 1500.00    |
| L-Selectin  | 9582.20  | 6058.40  | 28515.60 | 422.00  | 150000.00  |
| LYVE-1      | 3236.00  | 3281.00  | 2944.00  | 8.96    | 3000.00    |
| MICA        | 0.00     | 0.00     | 0.00     | 37.12   | 15000.00   |
| MICB        | 0.00     | 0.00     | 0.00     | 77.21   | 22500.00   |
| NRG1-b1     | 0.00     | 0.00     | 0.00     | 18.38   | 22500.00   |
| PDGF Rb     | 0.00     | 0.00     | 0.00     | 90.01   | 150000.00  |
| PECAM-1     | 0.00     | 0.00     | 115.90   | 81.00   | 30000.00   |
| RAGE        | 53.00    | 55.60    | 95.90    | 12.34   | 15000.00   |
| TIM-1       | 23.60    | 27.80    | 56.50    | 25.07   | 15000.00   |
| TRAIL R3    | 286.00   | 229.80   | 390.50   | 11.15   | 7500.00    |
| Trappin-2   | 4517.20  | 3139.50  | 3952.20  | 59.84   | 15000.00   |
| uPAR        | 1051.60  | 585.50   | 6480.50  | 91.02   | 60000.00   |
| VCAM-1      | 30851.80 | 17130.10 | 6337.20  | 889.00  | 300000.00  |
| XEDAR       | 0.00     | 0.00     | 0.00     | 37.11   | 15000.00   |
| Activin A   | 365.60   | 386.20   | 753.80   | 468.11  | 150000.00  |
| AgRP        | 770.80   | 730.00   | 470.50   | 69.42   | 15000.00   |
| ANG         | 2243.20  | 761.40   | 825.10   | 3.21    | 3000.00    |
| ANG-1       | 494.00   | 368.20   | 888.50   | 68.81   | 60000.00   |
| Angiostatin | 18116.00 | 16714.60 | 52822.90 | 5509.34 | 1500000.00 |
| Cathepsin S | 5460.60  | 4425.10  | 6105.10  | 18.12   | 15000.00   |
| CD 40       | 14.00    | 63.10    | 255.60   | 6.31    | 15000.00   |
| Cripto-1    | 843.60   | 747.50   | 268.70   | 40.45   | 15000.00   |
| DAN         | 761.80   | 4241.30  | 11295.30 | 57.36   | 60000.00   |
| DKK-1       | 2377.00  | 7334.80  | 14742.80 | 493.13  | 120000.00  |
| E-Cadherin  | 1425.80  | 2928.90  | 6805.60  | 101.94  | 120000.00  |
| EpCAM       | 21.00    | 56.30    | 265.10   | 21.27   | 30000.00   |
| FAS L       | 0.00     | 7.50     | 30.40    | 3.72    | 3000.00    |
| Fcr RIIB/C  | 111.20   | 133.50   | 1741.20  | 34.87   | 15000.00   |
| Follistatin | 675.80   | 866.10   | 38796.50 | 82.72   | 60000.00   |
| Galectin-7  | 213.20   | 662.50   | 1507.30  | 162.36  | 150000.00  |
| ICAM-2      | 3687.60  | 3303.60  | 20566.20 | 457.41  | 150000.00  |
| IL-13 R1    | 416.40   | 667.80   | 2302.40  | 39.84   | 15000.00   |
| IL-13 R2    | 772.20   | 1210.80  | 3483.70  | 607.83  | 30000.00   |
| IL-17B      | 271.20   | 596.00   | 1802.70  | 75.31   | 60000.00   |
| IL-2 Ra     | 45.80    | 131.90   | 244.30   | 21.62   | 15000.00   |
| IL-2 Rb     | 0.00     | 394.10   | 1271.70  | 517.82  | 150000.00  |
| IL-23       | 0.00     | 0.00     | 0.00     | 46.33   | 60000.00   |
| LAP         | 85.60    | 79.60    | 238.50   | 10.38   | 6000.00    |
| NrCAM       | 9994.20  | 8256.90  | 4364.60  | 37.58   | 30000.00   |
| PAI-I       | 7183.00  | 3298.20  | 6164.80  | 112.52  | 60000.00   |
| PDGF-AB     | 62.60    | 100.00   | 273.10   | 61.86   | 15000.00   |
| Resistin    | 140.20   | 506.20   | 63185.40 | 5.35    | 30000.00   |
| SDF-1b      | 139.00   | 167.90   | 461.30   | 248.00  | 60000.00   |
| sgp130      | 20640.20 | 10583.80 | 13772.40 | 146.95  | 120000.00  |
| Shh N       | 205.00   | 373.30   | 810.10   | 95.65   | 60000.00   |
| Siglec-5    | 10366.80 | 11487.20 | 23185.00 | 22.15   | 15000.00   |

|                 |          |          |          |         |           |
|-----------------|----------|----------|----------|---------|-----------|
| <b>ST2</b>      | 0.00     | 28.80    | 157.60   | 10.84   | 6000.00   |
| <b>TGF-b2</b>   | 2335.20  | 3504.10  | 10351.40 | 98.12   | 60000.00  |
| <b>Tie-2</b>    | 218.20   | 219.30   | 512.00   | 41.00   | 15000.00  |
| <b>TPO</b>      | 5185.40  | 5430.20  | 8276.20  | 1525.86 | 300000.00 |
| <b>TRAIL-R4</b> | 40.20    | 52.50    | 194.90   | 26.25   | 12000.00  |
| <b>TREM-1</b>   | 0.00     | 28.20    | 62.00    | 39.51   | 30000.00  |
| <b>VEGF-C</b>   | 1651.60  | 1006.30  | 978.80   | 47.99   | 30000.00  |
| <b>VEGF R1</b>  | 81929.40 | 47182.10 | 44876.30 | 120.74  | 60000.00  |

**Supplemental Table 8. Cytokines that decrease following Retisert treatment.** Cytokines concentrations are listed in pg/ml. Cytokines that underwent a -1.0-fold change (highlighted) were significantly decreased following Retisert treatment.

| Stage<br>Cytokine | NIV             |               | Post-Retisert   |               |             |
|-------------------|-----------------|---------------|-----------------|---------------|-------------|
|                   | Average (pg/ml) | STDEV (pg/ml) | Average (pg/ml) | STDEV (pg/ml) | Fold Change |
| IL-12p40          | 42.4            | 18.7          | 0.0             | 0.0           | -1.0        |
| RANTES            | 59.7            | 157.9         | 0.0             | 0.0           | -1.0        |
| bFGF              | 256.6           | 263.3         | 0.0             | 0.0           | -1.0        |
| BMP-4             | 131.4           | 180.0         | 0.0             | 0.0           | -1.0        |
| BMP-5             | 7475.1          | 6361.4        | 0.0             | 0.0           | -1.0        |
| BMP-7             | 3407.0          | 3199.7        | 0.0             | 0.0           | -1.0        |
| EGF               | 0.9             | 1.2           | 0.0             | 0.0           | -1.0        |
| FGF-4             | 473.5           | 529.6         | 0.0             | 0.0           | -1.0        |
| FGF-7             | 19.9            | 26.1          | 0.0             | 0.0           | -1.0        |
| GDNF              | 36.1            | 53.3          | 0.0             | 0.0           | -1.0        |
| IGF-I             | 328.9           | 441.4         | 0.0             | 0.0           | -1.0        |
| Insulin           | 1304.0          | 873.0         | 0.0             | 0.0           | -1.0        |
| NT-3              | 34.8            | 45.6          | 0.0             | 0.0           | -1.0        |
| SCF               | 4.7             | 9.0           | 0.0             | 0.0           | -1.0        |
| TGFb1             | 2239.6          | 1662.9        | 0.0             | 0.0           | -1.0        |
| VEGF R3           | 44.0            | 86.3          | 0.0             | 0.0           | -1.0        |
| Eotaxin-3         | 562.2           | 452.7         | 0.0             | 0.0           | -1.0        |
| MCP-3             | 14.1            | 37.4          | 0.0             | 0.0           | -1.0        |
| GITR              | 17.7            | 20.0          | 0.0             | 0.0           | -1.0        |
| IL-2 Rg           | 76.8            | 203.1         | 0.0             | 0.0           | -1.0        |
| IL-10 Rb          | 16.9            | 29.9          | 0.0             | 0.0           | -1.0        |
| IL-17R            | 5.6             | 14.9          | 0.0             | 0.0           | -1.0        |
| IL-21R            | 159.5           | 289.5         | 0.0             | 0.0           | -1.0        |
| MICB              | 71.3            | 98.1          | 0.0             | 0.0           | -1.0        |
| PDGF Rb           | 75.1            | 120.8         | 0.0             | 0.0           | -1.0        |
| MPIF-1            | 5587.6          | 5310.2        | 31.0            | 8.6           | -1.0        |
| MSPa              | 10419.6         | 25558.8       | 127.4           | 120.5         | -1.0        |
| E-Selectin        | 4214.8          | 6844.8        | 53.1            | 51.3          | -1.0        |
| IL-9              | 1406.4          | 1983.5        | 32.3            | 45.6          | -1.0        |
| NAP-2             | 49994.3         | 25002.9       | 2376.8          | 1782.1        | -1.0        |
| BLC               | 2315.1          | 3539.3        | 158.9           | 187.0         | -0.9        |
| CTACK             | 131.8           | 236.6         | 7.1             | 10.1          | -0.9        |
| BTC               | 10897.2         | 7385.0        | 667.0           | 542.2         | -0.9        |
| DKK-1             | 132150.6        | 144332.6      | 8151.5          | 5081.2        | -0.9        |
| IL-1ra            | 248.6           | 440.2         | 16.6            | 23.5          | -0.9        |
| SDF-1b            | 3691.3          | 1296.7        | 256.1           | 145.6         | -0.9        |
| Angiostatin       | 404343.6        | 559105.4      | 29217.8         | 16701.1       | -0.9        |
| TECK              | 601.9           | 757.6         | 55.2            | 78.0          | -0.9        |
| PECAM-1           | 397.6           | 243.5         | 38.6            | 54.6          | -0.9        |
| VCAM-1            | 182898.1        | 273266.8      | 18106.4         | 10031.8       | -0.9        |
| LIGHT             | 56.2            | 79.8          | 5.7             | 8.1           | -0.9        |
| SDF-1a            | 849.5           | 1103.3        | 94.7            | 47.9          | -0.9        |
| MIP-3b            | 962.5           | 960.2         | 108.8           | 26.4          | -0.9        |
| L-Selectin        | 126502.7        | 72934.7       | 14718.7         | 9861.4        | -0.9        |
| Endoglin          | 24.9            | 29.9          | 2.9             | 4.1           | -0.9        |
| MCP-1             | 7526.0          | 3351.7        | 884.8           | 280.6         | -0.9        |
| SCF R             | 8110.6          | 6889.9        | 1058.9          | 246.4         | -0.9        |
| ALCAM             | 502.4           | 573.6         | 67.3            | 35.1          | -0.9        |
| Eotaxin-2         | 172.9           | 162.5         | 23.2            | 21.1          | -0.9        |
| ErbB3             | 1033.2          | 1197.7        | 153.2           | 7.6           | -0.9        |
| MDC               | 642.5           | 721.5         | 98.0            | 108.6         | -0.8        |
| Eotaxin           | 13.8            | 19.2          | 2.1             | 3.0           | -0.8        |
| MCP-2             | 58.4            | 31.5          | 9.8             | 4.6           | -0.8        |
| IL-28A            | 18.2            | 48.3          | 3.3             | 4.7           | -0.8        |
| CD40 L            | 31.0            | 36.1          | 5.8             | 8.2           | -0.8        |
| HCC-4             | 3398.6          | 2300.2        | 642.2           | 336.8         | -0.8        |
| MIF               | 11983.9         | 9355.7        | 2277.0          | 2648.5        | -0.8        |
| CXCL16            | 35574.4         | 14521.7       | 7020.7          | 1856.7        | -0.8        |
| MIG               | 1785.0          | 1530.3        | 354.8           | 48.7          | -0.8        |

|             |          |         |         |         |      |
|-------------|----------|---------|---------|---------|------|
| IP-10       | 2022.9   | 2325.8  | 427.8   | 338.7   | -0.8 |
| LAP         | 636.2    | 650.8   | 134.6   | 73.5    | -0.8 |
| PDGF-BB     | 19.7     | 7.8     | 4.2     | 1.8     | -0.8 |
| Flt-3L      | 137.0    | 61.8    | 29.5    | 5.9     | -0.8 |
| MCF R       | 36214.0  | 21457.9 | 8130.4  | 3750.8  | -0.8 |
| Fas         | 173.1    | 209.6   | 39.9    | 5.6     | -0.8 |
| 6Ckine      | 826.4    | 378.6   | 190.8   | 145.3   | -0.8 |
| ANG         | 5454.7   | 2712.9  | 1276.6  | 684.0   | -0.8 |
| PDGF-AB     | 616.0    | 638.3   | 145.2   | 91.7    | -0.8 |
| MIP-1d      | 1102.9   | 667.5   | 265.2   | 146.9   | -0.8 |
| TNF RII     | 2322.4   | 1274.0  | 561.2   | 335.9   | -0.8 |
| Siglec-5    | 59678.8  | 28024.1 | 15013.0 | 5796.6  | -0.7 |
| PDGF-AA     | 1438.6   | 996.8   | 364.1   | 141.8   | -0.7 |
| PF4         | 1882.7   | 2854.2  | 493.1   | 621.1   | -0.7 |
| IL-18 BPa   | 402.3    | 418.2   | 106.6   | 150.7   | -0.7 |
| TSLP        | 47.4     | 125.3   | 15.3    | 18.3    | -0.7 |
| Catheprin S | 15064.6  | 6364.9  | 5330.3  | 692.0   | -0.6 |
| HCC-1       | 4290.6   | 1958.5  | 1560.2  | 649.9   | -0.6 |
| TRAIL R3    | 790.7    | 429.4   | 302.1   | 66.6    | -0.6 |
| Dtk         | 835.6    | 449.4   | 321.1   | 158.1   | -0.6 |
| RAGE        | 176.7    | 154.9   | 68.2    | 19.6    | -0.6 |
| MIP-1b      | 127.5    | 93.2    | 51.2    | 72.4    | -0.6 |
| sgp130      | 37043.2  | 15802.8 | 14998.8 | 4196.1  | -0.6 |
| AgRP        | 1617.3   | 880.7   | 657.1   | 133.0   | -0.6 |
| HGF         | 21170.6  | 13000.2 | 8678.5  | 1458.8  | -0.6 |
| ICAM-1      | 14327.6  | 6317.0  | 5986.4  | 2534.9  | -0.6 |
| IGFBP-1     | 2546.9   | 1791.4  | 1134.4  | 267.1   | -0.6 |
| TNF RI      | 6692.9   | 2695.1  | 3020.4  | 915.0   | -0.5 |
| VEGF R1     | 128020.0 | 66627.7 | 57995.9 | 16949.7 | -0.5 |
| TIMP-1      | 38925.6  | 19447.2 | 18242.7 | 7355.7  | -0.5 |
| TIMP-2      | 45084.5  | 22620.0 | 21973.2 | 9177.3  | -0.5 |
| PAI-I       | 11202.0  | 5532.0  | 5548.7  | 1644.7  | -0.5 |
| ICAM-2      | 18026.2  | 19008.6 | 9185.8  | 8048.7  | -0.5 |
| EGF R       | 6247.3   | 2495.1  | 3239.6  | 1289.8  | -0.5 |
| NT-4        | 34.3     | 39.0    | 18.5    | 21.0    | -0.5 |
| uPAR        | 4960.3   | 3508.4  | 2705.9  | 2675.8  | -0.5 |
| TGFa        | 20.5     | 30.1    | 11.9    | 8.8     | -0.4 |
| Fcr RIIB/C  | 1129.8   | 1178.7  | 662.0   | 763.2   | -0.4 |
| Trappin-2   | 6594.5   | 2501.2  | 3869.6  | 565.5   | -0.4 |
| IL-8        | 86.8     | 92.7    | 52.1    | 39.6    | -0.4 |
| Activin A   | 825.0    | 647.7   | 501.9   | 178.3   | -0.4 |
| IL-1a       | 11.7     | 10.3    | 7.2     | 8.2     | -0.4 |
| TREM-1      | 47.5     | 91.8    | 30.1    | 25.3    | -0.4 |
| GDF-15      | 1723.7   | 730.0   | 1092.9  | 137.8   | -0.4 |
| BCMA        | 2803.0   | 2181.8  | 1786.3  | 792.8   | -0.4 |
| IGFBP-2     | 34960.2  | 14976.6 | 22354.6 | 6705.1  | -0.4 |
| OPG         | 7142.2   | 1581.0  | 4791.0  | 580.1   | -0.3 |
| NrCAM       | 11219.7  | 6395.1  | 7538.6  | 2353.7  | -0.3 |
| VEGF        | 2159.8   | 3893.4  | 1495.7  | 2008.9  | -0.3 |
| PARC        | 22602.2  | 11675.2 | 15814.2 | 8404.4  | -0.3 |
